# Supplementary material for: Ni and Fe catalyzed cascade radical reactions of oxime esters with diselenides
Source: Royal Society of Chemistry journal article supplement (doi:10.1039/d2qo00586g), 2022-01-01

## Supporting Information

# Ni and Fe Catalyzed Cascade Radical Reactions of Oxime Esters with Diselenides

Linpeng Liu,<sup>a</sup> Yanyu Jian,<sup>a</sup> Weigao Hu,<sup>b</sup> Shaohu Zhao,<sup>a</sup> Zhang-Jie Shi,<sup>c,d</sup> Nicklas  
Selander<sup>b\*</sup> and Taigang Zhou<sup>a\*</sup>

<sup>a</sup>College of Chemistry and Chemical Engineering, Southwest Petroleum University, Xindu Rd. 8, Chengdu,  
Sichuan 610500, P. R. China

<sup>b</sup>Department of Organic Chemistry, Stockholm University, Arrhenius Laboratory, SE-106 91 Stockholm, Sweden

<sup>c</sup>Department of Chemistry, Fudan University, Shanghai 200438, China

<sup>d</sup>State Key Laboratory of Organometallic Chemistry, Shanghai Institute of Organic Chemistry, Shanghai 200032,  
China

Email: tgzhou@swpu.edu.cn

nicklas.selander@su.se

## Table of Contents

|                                                                               |            |
|-------------------------------------------------------------------------------|------------|
| <b>1. General Information</b> .....                                           | <b>S2</b>  |
| <b>2. Experimental Procedures</b> .....                                       | <b>S3</b>  |
| <b>2.1 Preparation of Oxime Ester Derivatives</b> .....                       | <b>S3</b>  |
| <b>2.2 Screening of reaction conditions</b> .....                             | <b>S8</b>  |
| <b>2.3 General procedure for the selenylation of oxime esters</b> .....       | <b>S13</b> |
| <b>2.4 Amplification reaction</b> .....                                       | <b>S14</b> |
| <b>3. Trapping the radical intermediate with TEMPO</b> .....                  | <b>S15</b> |
| <b>4. Spectral Data</b> .....                                                 | <b>S16</b> |
| <b>5. References</b> .....                                                    | <b>S31</b> |
| <b>6. <sup>1</sup>H, <sup>13</sup>C, and <sup>19</sup>F NMR Spectra</b> ..... | <b>S32</b> |

## 1. General Information

All reactions were carried out under argon atmosphere using standard Schlenk techniques. FeCl<sub>2</sub> was purchased from Bide Pharmatech. Other reagents were purchased from Adamas-beta<sup>®</sup> and Aladdin<sup>®</sup>. All commercial reagents were used as received.  $\gamma,\delta$ -Unsaturated oxime esters, cyclic ketoxime esters and aryl diselenides were prepared according to literature procedures using commercial reagents (Sect. 2.1). <sup>1</sup>H NMR and <sup>13</sup>C NMR spectra were recorded at room temperature on a Bruker 400 or a 600 MHz spectrometer. Chemical shifts ( $\delta$ ) are reported in ppm with the following abbreviations used for the observed multiplicities: s (singlet), d (doublet), t (triplet), q (quartet), br (broad), m (multiplet for unresolved lines). <sup>1</sup>H NMR chemical shifts were referenced to the residual solvent signal for CDCl<sub>3</sub> (7.26 ppm), and <sup>13</sup>C NMR chemical shifts were referenced to the solvent signal of CDCl<sub>3</sub> (77.16 ppm). Analytical TLC was performed on pre-coated silica gel plates. After elution, the plates were visualized by UV illumination at 254-360 nm and by staining with 5% PdCl<sub>2</sub> solvent (in 10% hydrochloric acid solvent). The crude products were purified by column chromatography using silica gel (200-300 mesh). GC analyses were performed on a Shimadzu Nexis GC-2030 equipped with an ZB-5MS plus column (30 mm  $\times$  0.32 mm  $\times$  0.50  $\mu$ m). HRMS analysis was performed on Shimadzu LCMS-ITTOF and Waters Vion IMS QToF. Isomeric ratios of the products were determined by <sup>1</sup>H NMR analysis of crude reaction mixtures.

## 2. Experimental Procedures

### 2.1 Preparation of Oxime Ester Derivatives

The oxime esters **1a-1u**, **4a-4l** (listed in Table S1) and aryl diselenides **2r-2w** (listed in Table S2) were synthesized according to literature procedures. Spectral data can be found in the following references: **1a-1b**<sup>[1, 2]</sup>, **1e**<sup>[3]</sup>, **1i-1j**<sup>[3]</sup>, **1l-1m**<sup>[3, 4]</sup>, **1o-1q**<sup>[5, 6]</sup>, **4a-4g**<sup>[7-9]</sup>, **4i-4k**<sup>[10-12]</sup>, **2r-2w**<sup>[13, 14]</sup>

**Table S1:** Oxime ester derivatives used in this study

|                                                                                         |                                                                                                                                            |                                           |                                           |
|-----------------------------------------------------------------------------------------|--------------------------------------------------------------------------------------------------------------------------------------------|-------------------------------------------|-------------------------------------------|
|                                                                                         |                                                                                                                                            |                                           |                                           |
| <b>1a</b> , R = COC <sub>6</sub> F <sub>5</sub><br><b>1aa</b> , R = Ac                  | <b>1b</b> , R = Cl<br><b>1c</b> , R = F<br><b>1d</b> , R = Me<br><b>1e</b> , R = OMe                                                       | <b>1f</b> , R = Cl<br><b>1g</b> , R = OMe | <b>1h</b> , R = Cl<br><b>1i</b> , R = OMe |
|                                                                                         |                                                                                                                                            |                                           |                                           |
| <b>1j</b>                                                                               | <b>1k</b> , X = S<br><b>1l</b> , X = O                                                                                                     | <b>1m</b>                                 | <b>1n</b>                                 |
|                                                                                         |                                                                                                                                            |                                           |                                           |
| <b>1o</b>                                                                               | <b>1p</b>                                                                                                                                  | <b>1q</b>                                 |                                           |
|                                                                                         |                                                                                                                                            |                                           |                                           |
| <b>4a</b> , R = H<br><b>4b</b> , R = Ph<br><b>4c</b> , R = OBn<br><b>4d</b> , R = COOEt | <b>4e</b> , R = Me, X = CH <sub>2</sub><br><b>4f</b> , R = Bn, X = CH <sub>2</sub><br><b>4g</b> , R = H, X = O<br><b>4h</b> , R = H, X = S | <b>4i</b> , R = Me<br><b>4j</b> , R = H   | <b>4k</b>                                 |
|                                                                                         |                                                                                                                                            |                                           |                                           |
| <b>4l</b>                                                                               |                                                                                                                                            |                                           |                                           |

**Table S2:** Aryl diselenides used in this study

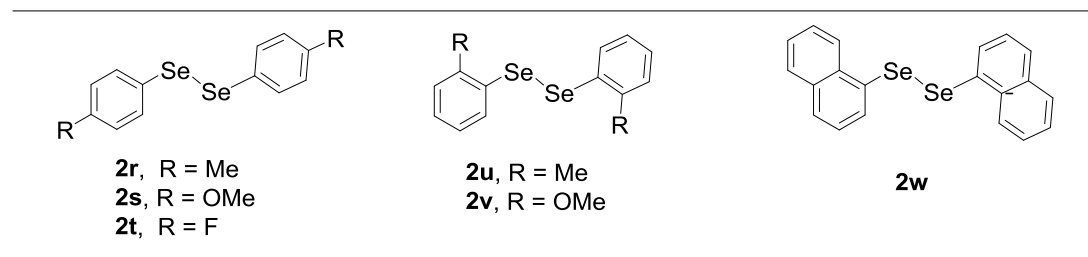

Synthesis of oxime esters **1c-1d**, **1f-1h**, **1k**

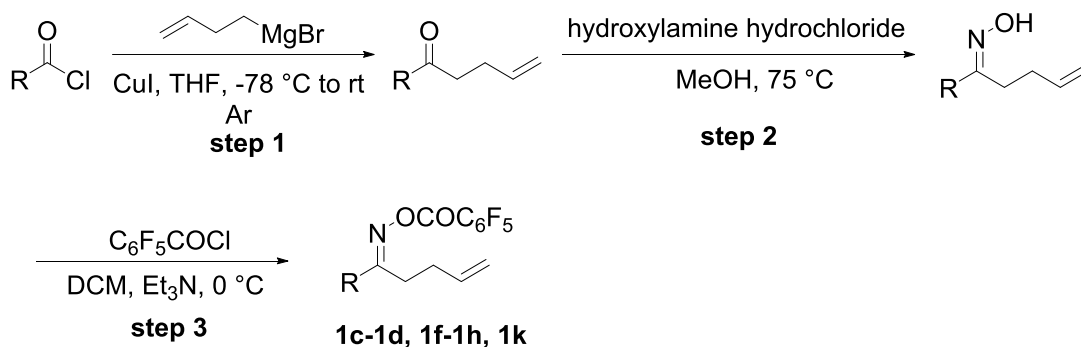

**Step 1:** A dry two-neck flask equipped with a stirring bar was charged with CuI (5mol%) and then the flask was refilled with argon. The acid chloride (1.1 equiv.) and THF (0.7 M) were subsequently added. The mixture was stirred at room temperature for a few minutes and then cooled down to  $-78\text{ }^{\circ}\text{C}$ . 3-Butenylmagnesium bromide (10 mmol, 0.5 M in THF) was added dropwise to the mixture. After completion, the reaction mixture was allowed to warm up to room temperature overnight. Then the reaction was quenched by adding saturated aqueous  $\text{NH}_4\text{Cl}$  solution and diluted with EA. The layers were separated, and the aqueous layer was extracted with EA. The combined organic layers were dried over  $\text{MgSO}_4$ , concentrated in *vacuo*. Purification of the crude product by column chromatography on silica gel provided the ketone.

**Step 2:** To hydroxylamine hydrochloride (1.2 equiv.) and sodium acetate (1.2 equiv.) was added the solution of alkenyl ketone in MeOH (0.3 M). The reaction mixture was heated to  $75\text{ }^{\circ}\text{C}$  and stirred overnight. The resulting mixture was cooled



down to room temperature, diluted with brine and extracted with EA. The organic layer was dried over  $\text{Na}_2\text{SO}_4$  and concentrated in *vacuo*. Purification of the crude product by column chromatography on silica gel provided the oxime.

**Step 3:** To a solution of  $\gamma,\delta$ -unsaturated oxime (1.0 equiv) in DCM (1.0 M) were added triethylamine (2.0 equiv) and  $\text{C}_6\text{F}_5\text{COCl}$  (1.2 equiv) at 0 °C. After stirring for 6 h, water was added and the mixture was diluted with EA. The organic layer was washed with water and dried over anhydrous  $\text{Na}_2\text{SO}_4$ . The solvent was removed in *vacuo* and the residue was subjected to column chromatography with the indicated eluent system to obtain  $\gamma,\delta$ -unsaturated oxime esters **1c-1d**, **1f-1h**, **1k**.

### Synthesis of compound **1n**

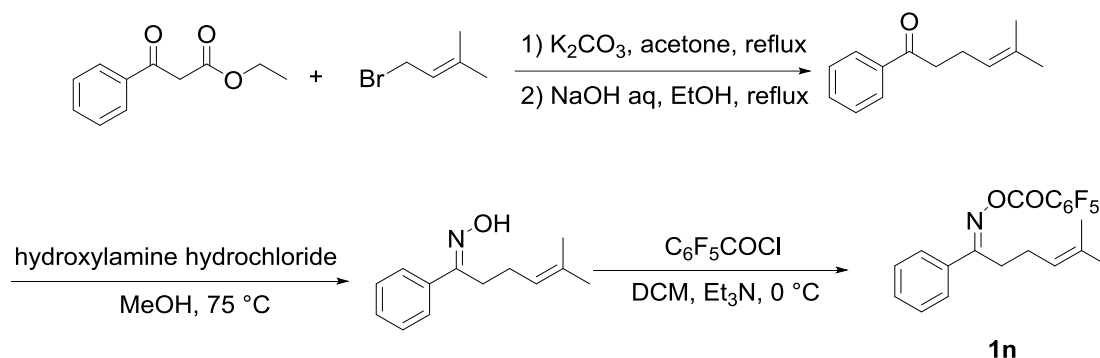

To a flask charged with potassium carbonate (1.2 equiv) was added a solution of ethyl benzoacetate (10 mmol) and 1-bromo-3-methylbut-2-ene (1.08 equiv) in acetone (0.4 M). The reaction mixture was heated at reflux overnight. After cooling, solids were removed by filtration and washed with acetone. The combined filtrates were concentrated in *vacuo*. Then the residue was dissolved in ethanol. 10 % Aqueous sodium hydroxide solution was added to the solution. The reaction mixture was heated at reflux for 3 h. After cooling, the mixture was extracted with EA. The combined organic layers were dried over  $\text{MgSO}_4$  and concentrated in *vacuo*. Purification of the crude product by column chromatography on silica gel provided 5-methyl-1-phenylhex-4-en-1-one.

To a flask charged with hydroxylamine hydrochloride (1.2 equiv.) and sodium acetate (1.2 equiv.) was added the solution of 5-methyl-1-phenylhex-4-en-1-one in

MeOH (0.3 M). The reaction mixture was heated to 75 °C and stirred overnight. The resulting mixture was cooled down to room temperature, diluted with brine and extracted with EA. The organic layer was dried over Na<sub>2</sub>SO<sub>4</sub> and concentrated in *vacuo*. Purification of the crude product by column chromatography on silica gel provided the 5-methyl-1-phenylhex-4-en-1-one oxime.

To a solution of 5-methyl-1-phenylhex-4-en-1-one oxime (1.0 equiv) in DCM (1.0 M) were added triethylamine (2.0 equiv) and C<sub>6</sub>F<sub>5</sub>COCl (1.2 equiv) at 0 °C. After stirring for 6 h, water was added and the mixture was diluted with EA. The organic layer was washed with water and dried over anhydrous Na<sub>2</sub>SO<sub>4</sub>. The solvent was removed in *vacuo* and the residue was subjected to column chromatography with the indicated eluent system to obtain 1-phenylhex-4-en-1-one *o*-perfluorobenzoyl oxime **1n**.

#### Synthesis of oxime ester **4h**

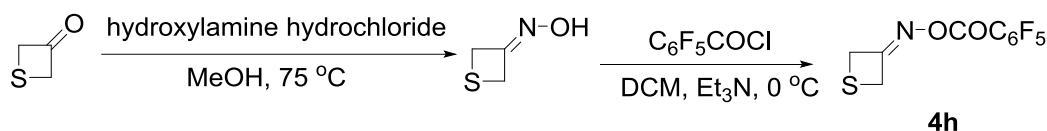

To a flask charged with hydroxylamine hydrochloride (1.2 equiv.) and sodium acetate (1.2 equiv.) was added a solution of thietan-3-one (10 mmol) in MeOH (0.3 M). The reaction mixture was heated to 75 °C and stirred overnight. The resulting mixture was cooled down to room temperature, diluted with brine and extracted with EA. The organic layer was dried over Na<sub>2</sub>SO<sub>4</sub> and concentrated in *vacuo*. Purification of the crude product by column chromatography on silica gel provided the thietan-3-one oxime.

To a solution of thietan-3-one oxime (1.0 equiv) in DCM (1.0 M) were added triethylamine (2.0 equiv) and C<sub>6</sub>F<sub>5</sub>COCl (1.2 equiv) at 0 °C. After stirring for 6 h, water was added and the mixture was diluted with EA. The organic layer was washed with water and dried over anhydrous Na<sub>2</sub>SO<sub>4</sub>. The solvent was removed in *vacuo* and the residue was subjected to column chromatography with the indicated eluent system

to obtain thietan-3-one *o*-perfluorobenzoyl oxime **4h**.

#### Synthesis of oxime ester **4i**

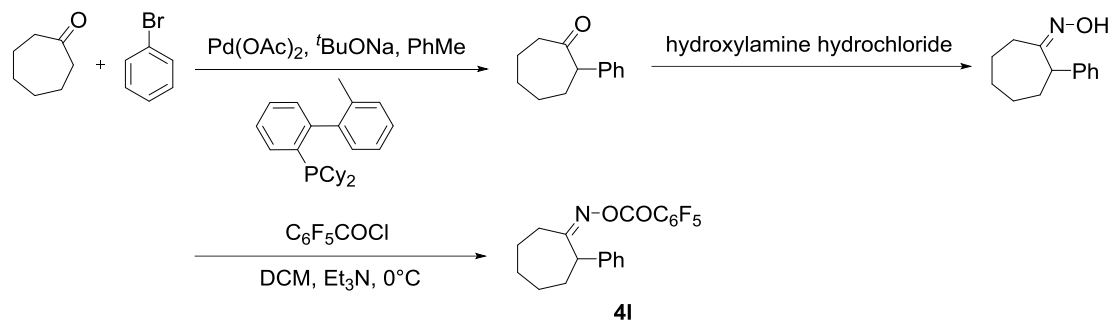

A 100 mL flame-dried schlenk tube was filled with argon,  $\text{Pd}(\text{OAc})_2$  (2.5 mol%), ligand (5 mol%),  $t\text{BuONa}$  (1.3 equiv.), ketone (10.0 mmol), aryl bromides (1.3 equiv) and toluene (1.0 M). The tube was then sealed and heated at  $45^\circ\text{C}$  under stirring for 12 hours, and finally quenched with  $\text{H}_2\text{O}$ . The resulting mixture was extracted with EA. The organic layer was dried over  $\text{Na}_2\text{SO}_4$  and concentrated in vacuo. Purification of the crude product by column chromatography on silica gel provided the 2-phenylcycloheptan-1-one.

To a flask charged with hydroxylamine hydrochloride (1.2 equiv.) and sodium acetate (1.2 equiv.) was added a solution of 2-phenylcycloheptan-1-one (1.0 equiv) in  $\text{MeOH}$  (0.3 M). The reaction mixture was heated to  $75^\circ\text{C}$  and stirred overnight. The resulting mixture was cooled down to room temperature, diluted with brine and extracted with EA. The organic layer was dried over  $\text{Na}_2\text{SO}_4$  and concentrated in *vacuo*. Purification of the crude product by column chromatography on silica gel provided the 2-phenylcycloheptan-1-one oxime.

To a solution of 2-phenylcycloheptan-1-one oxime (1.0 equiv) in  $\text{DCM}$  (1.0 M) were added triethylamine (2.0 equiv) and  $\text{C}_6\text{F}_5\text{COCl}$  (1.2 equiv) at  $0^\circ\text{C}$ . After stirring for 6 h, water was added and the mixture was diluted with EA. The organic layer was washed with water and dried over anhydrous  $\text{Na}_2\text{SO}_4$ . The solvent was removed in *vacuo* and the residue was subjected to column chromatography with the indicated eluent system to obtain thietan-3-one *o*-perfluorobenzoyl oxime **4i**.

## 2.2 Screening of reaction conditions

To a screw-cap vial equipped with a magnetic stirring bar were added catalyst (0.02 mmol), ligand (0.02 mmol) and solvent under argon. The mixture was stirred at 80 °C for 30 min. The  $\gamma,\delta$ -unsaturated *O*-acyloxime (0.20 mmol), aryl diselenide (0.15 mmol) and base (2.00 mmol) were added sequentially under argon. After the addition, the mixture was stirred at the specified temperature for the indicated reaction time. Then, the mixture was allowed to cool down to room temperature and the solvent was removed in *vacuo*. Then, the residue was re-dissolved and flushed through a glass pipette filled with silica gel inside (approx. 4.0 cm in length) using ethyl acetate (approx. 5.0 mL) as an eluent to remove the metal salt. Yields were determined by GC using *n*-dodecane as the internal calibration standard. The results are summarized in Tables S3-S8.

**Table S3 Screening of metal salts.**

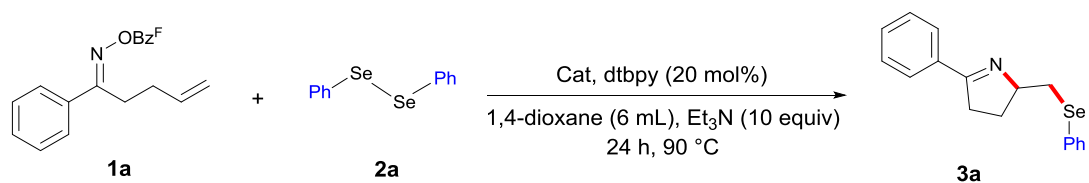

| Entry | Cat ( X mol%)                 | L     | GC Yield (%) |
|-------|-------------------------------|-------|--------------|
| 1     | No Cat                        | --    | N.P          |
| 2     | No Cat                        | dtbpy | N.P          |
| 3     | NiBr <sub>2</sub> (20)        | --    | 17           |
| 4     | NiBr <sub>2</sub> (20)        | dtbpy | 58           |
| 5     | AgSbF <sub>6</sub> (20)       | dtbpy | 40           |
| 6     | CuOAc (20)                    | dtbpy | 74           |
| 7     | FeCl <sub>2</sub> (20)        | dtbpy | 77           |
| 8     | FeCl <sub>3</sub> (20)        | dtbpy | 73           |
| 9     | Pd(OAc) <sub>2</sub> (20)     | dtbpy | 57           |
| 10    | Ni(OTf) <sub>2</sub> (20)     | dtbpy | 54           |
| 11    | NiCl <sub>2</sub> •glyme (20) | dtbpy | 21           |
| 12    | Ni(COD) <sub>2</sub> (20)     | dtbpy | 85           |
| 13    | Ni(COD) <sub>2</sub> (20)     | --    | 17           |
| 14    | Ni(COD) <sub>2</sub> (5)      | dtbpy | 38           |
| 15    | Ni(COD) <sub>2</sub> (10)     | dtbpy | 58           |
| 16    | Ni(COD) <sub>2</sub> (20)     | dtbpy | 64           |

## Table S4 Screening of Ligands

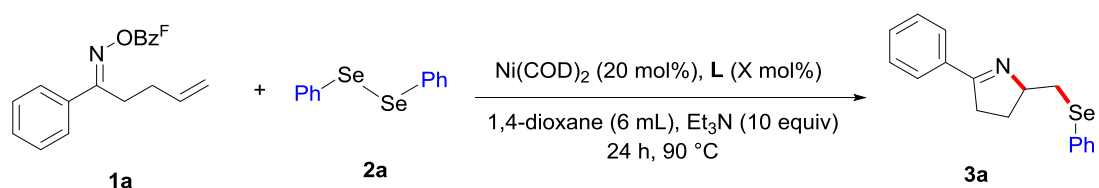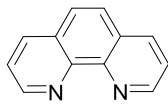

**L1**

**L1 (5 mol%): 78%**  
**L1 (10 mol%): 82%**  
**L1 (20 mol%): 90%**  
**L1 (30 mol%): 75%**

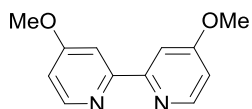

**L5 (20 mol%)**  
**50%**

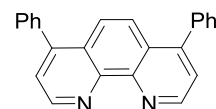

**L6 (20 mol%)**  
**44%**

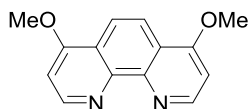

**L7 (20 mol%)**  
**13%**

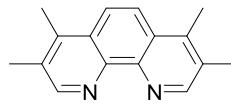

**L8 (20 mol%)**  
**34%**

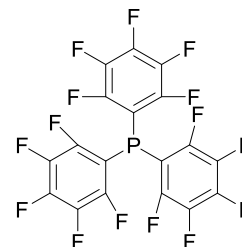

**L9 (20 mol%)**  
**29%**

**Table S5 Screening of bases.**

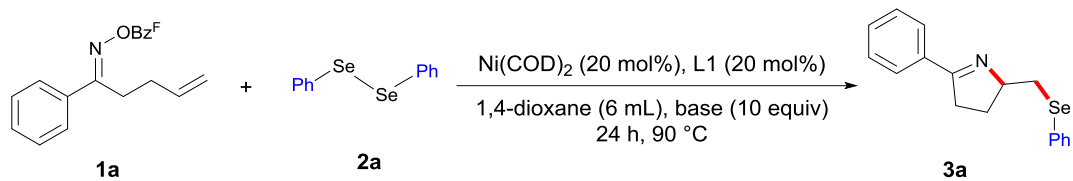

| Entry | Base                            | GC Yield (%) |
|-------|---------------------------------|--------------|
| 1     | None                            | /            |
| 2     | Et <sub>3</sub> N               | 90           |
| 3     | DBU                             | 7            |
| 4     | EDA                             | /            |
| 5     | <i>i</i> Pr <sub>2</sub> NEt    | 81           |
| 6     | TMEDA                           | 83           |
| 7     | K <sub>2</sub> CO <sub>3</sub>  | 25           |
| 8     | Na <sub>2</sub> CO <sub>3</sub> | 26           |
| 9     | Cs <sub>2</sub> CO <sub>3</sub> | 46           |
| 10    | <i>t</i> BuOK                   | /            |
| 11    | NaOH                            | 38           |
| 12    | Et <sub>3</sub> N (5 equiv)     | 74           |

**Table S6 Screening of solvents.**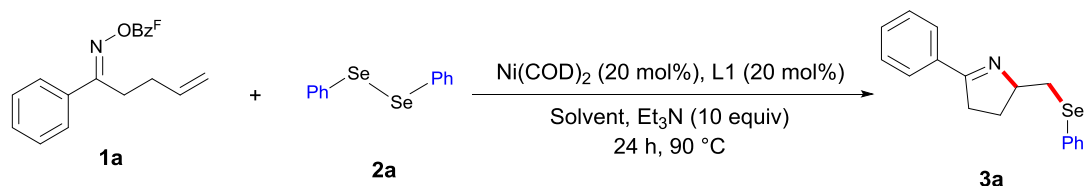

| Entry | Solvent (X mL)            | GC Yield (%) |
|-------|---------------------------|--------------|
| 1     | 1,4-dioxane (6 mL)        | 90           |
| 2     | DMF (6 mL)                | 7            |
| 3     | CH <sub>3</sub> CN (6 mL) | 12           |
| 4     | toluene (6 mL)            | 45           |
| 5     | THF (6 mL)                | 24           |
| 6     | DMSO (6 mL)               | 17           |
| 7     | DCM (6 mL)                | 18           |
| 8     | EA (6 mL)                 | 13           |
| 9     | NMP (6 mL)                | 19           |
| 10    | EtOH (6 mL)               | trace        |
| 11    | MeOH (6 mL)               | trace        |
| 12    | cyclohexane (6 mL)        | 6            |
| 13    | 1,4-dioxane (2 mL)        | 61           |
| 14    | 1,4-dioxane (4 mL)        | 79           |
| 15    | 1,4-dioxane (8 mL)        | 41           |

**Table S7 Screening equivalences of the diselenide 2a**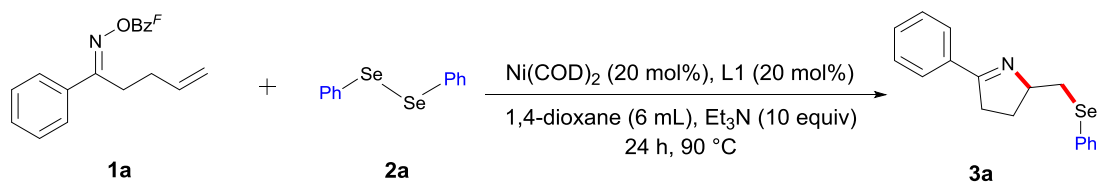

| Entry | 2a (X equiv) | GC Yield (%) <sup>b</sup> |
|-------|--------------|---------------------------|
| 1     | 0.5          | 58                        |
| 2     | 1.0          | 80                        |
| 3     | 1.5          | 90                        |
| 4     | 2.0          | 92                        |



**Table S8 Screening of reaction time and temperature**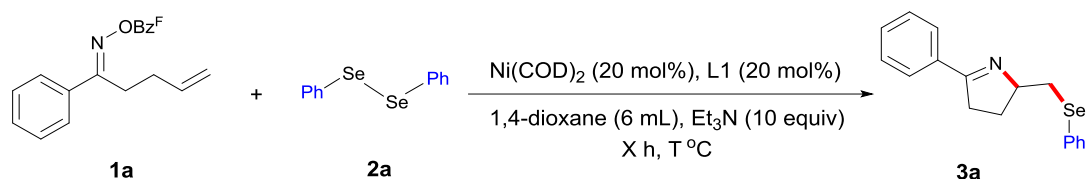

| Entry | Temperature (°C) | Time (h) | Conv (%) | GC Yield (%) |
|-------|------------------|----------|----------|--------------|
| 1     | r.t              | 24       | 1<       | /            |
| 2     | 40               | 24       | 17       | 10           |
| 3     | 60               | 24       | 21       | 14           |
| 4     | 80               | 24       | >99      | 85           |
| 5     | 90               | 24       | >99      | 90           |
| 6     | 90               | 6        | 89       | 86           |
| 7     | 90               | 12       | >99      | 90           |
| 8     | 90               | 36       | >99      | 89           |

### 2.3 General procedure for the selenylation of oxime esters

**Method A:** To a screw-cap vial equipped with a magnetic stirring bar were added Ni(COD)<sub>2</sub> (0.04 mmol, 11.0 mg, 0.2 equiv), **L1** (0.04 mmol, 7.2 mg, 0.2 equiv) and 1,4-dioxane (6 mL) under argon. The mixture was stirred at 80 °C for 30 min. Then, oxime esters (0.20 mmol, 1.0 equiv), aryl diselenides (0.30 mmol, 1.5 equiv) and Et<sub>3</sub>N (2.00 mmol, 202.4 mg, 10.0 equiv) were added sequentially under argon. After the addition, the reaction mixture was stirred at 90 °C for 12 h. Then, the mixture was allowed to cool down to room temperature and the solvent was removed *in vacuo*. The crude products were purified by column chromatography.

**Method B:** To a screw-cap vial equipped with a magnetic stirring bar were added FeCl<sub>2</sub> (0.04 mmol, 5.1 mg, 0.2 equiv), **L1** (0.04 mmol, 7.2 mg, 0.2 equiv) and 1,4-dioxane (6 mL) under argon. The mixture was stirred at 80 °C for 30 min. Then, the oxime esters (0.20 mmol, 1.0 equiv), aryl diselenides (0.30 mmol, 1.5 equiv) and Et<sub>3</sub>N (2.00 mmol, 202.4 mg, 10.0 equiv) were added sequentially under argon. After

the addition, the reaction mixture was stirred at 90 °C for 24 h. Then, the mixture was allowed to cool down to room temperature and the solvent was removed *in vacuo*. The crude products were purified by column chromatography.

## 2.4 Procedure for reactions performed at a larger scale

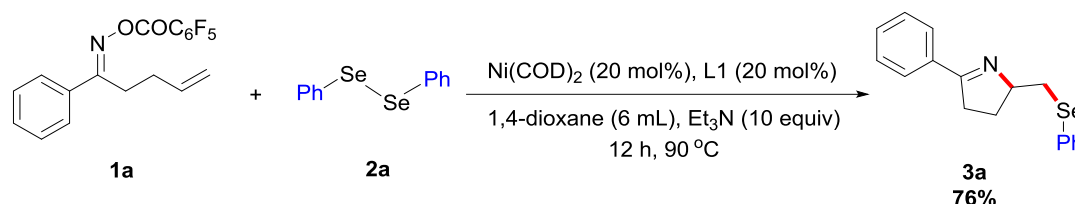

To a screw-cap vial equipped with a magnetic stirring bar were added Ni(COD)<sub>2</sub> (0.16 mmol, 44.0 mg, 0.2 equiv), **L1** (0.16 mmol, 28.8 mg, 0.2 equiv) and 1,4-dioxane (24 mL) under argon. The mixture was stirred at 80 °C for 30 min. Then,  $\gamma,\delta$ -unsaturated oxime ester **1a** (0.80 mmol, 1.0 equiv), aryl diselenide **2a** (1.20 mmol, 1.5 equiv) and Et<sub>3</sub>N (8.00 mmol, 809.5 mg, 10.0 equiv) were added sequentially under argon. After the addition, the reaction mixture was stirred at 90 °C for 12 h. Then, the mixture was allowed to cool down to room temperature and the solvent was removed *in vacuo*. The crude products were purified by column chromatography. The isolated yield of **3a** is 76%.

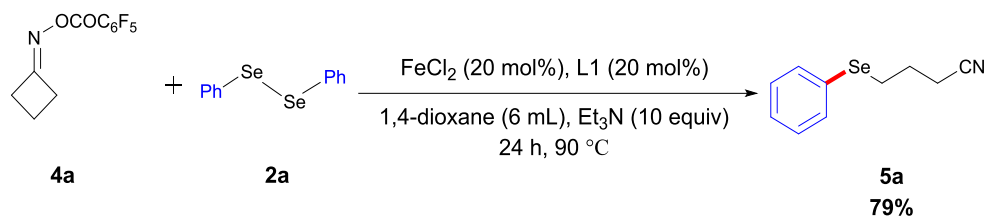

To a screw-cap vial equipped with a magnetic stirring bar were added FeCl<sub>2</sub> (0.2 mmol, 25.4 mg, 0.2 equiv), **L1** (0.2 mmol, 36.0 mg, 0.2 equiv) and 1,4-dioxane (30 mL) under argon. The mixture was stirred at 80 °C for 30 min. Then, the cycloketoxime ester **4a** (1.0 mmol, 1.0 equiv), aryl diselenide **2a** (1.5 mmol, 1.5 equiv) and Et<sub>3</sub>N (10.0 mmol, 1.01 g, 10.0 equiv) were added sequentially under argon. After the addition, the reaction mixture was stirred at 90 °C for 24 h. Then, the mixture was allowed to cool down to room temperature and the solvent was removed *in vacuo*.

The crude products were purified by column chromatography. The isolated yield of **5a** is 79%.

### 3. Trapping the radical intermediate with TEMPO

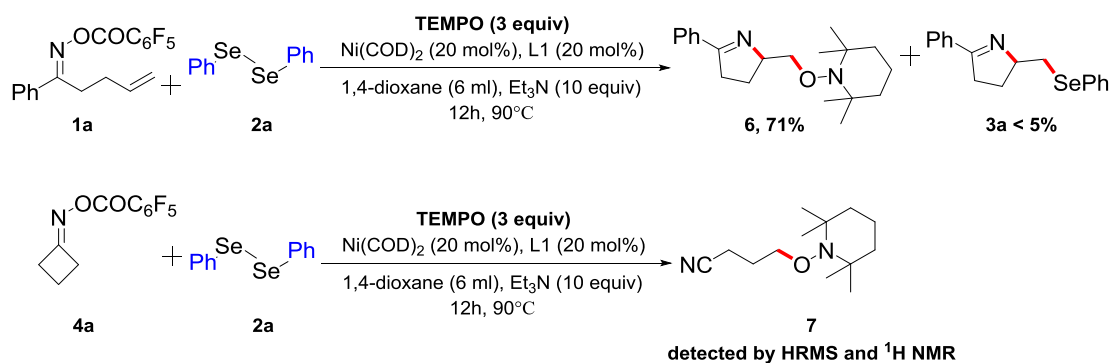

To a screw-cap vial equipped with a magnetic stirring bar were added Ni(COD)<sub>2</sub> (0.04 mmol, 20.0 mol%), **L1** (0.04 mmol, 20.0 mol%) and 1,4-dioxane (6.0 mL) under argon. The mixture was stirred at 80 °C for 30 min. Then, oxime ester (0.20 mmol, 1.0 equiv), **2a** (0.30 mmol, 1.5 equiv), Et<sub>3</sub>N (2.00 mmol, 10.0 equiv) and TEMPO (0.60 mmol, 3 equiv) were added sequentially under argon. After the addition, the reaction mixture was stirred at 90 °C for 12 h. Then, the mixture was allowed to cool down to room temperature and the solvent was removed in *vacuo*. The crude products were purified by column chromatography to yield **6** in 71% yield. However, compound **7** decomposed during purification. The mass of compound **7** was detected by HRMS.

#### 4-((2,2,6,6-tetramethylpiperidin-1-yl)oxy)butanenitrile (**7**)

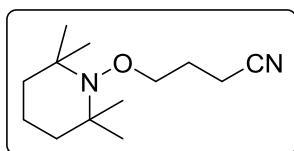

**HRMS** (ESI):  $m/z$  calcd for C<sub>14</sub>H<sub>13</sub>NSe [M+H]<sup>+</sup> 225.1966, found 225.1958.

## 4. Spectral Data

### 1-(4-Fluorophenyl)pent-4-en-1-one O-perfluorobenzoyl oxime (1c)

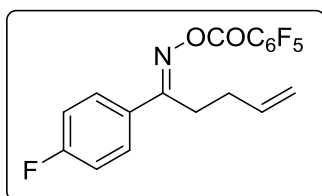

**1c:** ( 59%, 2.2 g, white solid; m.p. 68-70 °C);  $^1\text{H NMR}$  (400 MHz, Chloroform-*d*)  $\delta$  7.76 (dd,  $J = 8.9, 5.3$  Hz, 2H), 7.13 (t,  $J = 8.6$  Hz, 2H), 5.78 (td,  $J = 16.9, 6.6$  Hz, 1H), 5.08 – 4.98 (m, 2H), 3.02 – 2.93 (m, 2H), 2.38 – 2.27 (m, 2H);  $^{13}\text{C NMR}$  (151 MHz, Chloroform-*d*)  $\delta$  167.1, 164.6 (d,  $J = 251.9$  Hz), 156.4, 146.5 (d,  $J = 27.0$  Hz), 144.6 (d,  $J = 78.5$  Hz), 142.8 (d,  $J = 36.1$  Hz), 138.7 (d,  $J = 34.4$  Hz), 137.0 (d,  $J = 34.6$  Hz), 136.0, 129.7 (d,  $J = 8.7$  Hz), 129.2 (d,  $J = 3.3$  Hz), 116.2, 116.0 (d,  $J = 21.9$  Hz), 107.0 (d,  $J = 35.9$  Hz), 30.7, 28.1;  $^{19}\text{F NMR}$  (376 MHz, Chloroform-*d*)  $\delta$  -108.65, -136.51 – -137.94 (m), -147.29 (tt,  $J = 21.0, 5.0$  Hz), -159.59 – -159.76 (m); **HRMS** (ESI):  $m/z$  calcd for  $\text{C}_{18}\text{H}_{11}\text{F}_6\text{NO}_2$   $[\text{M}+\text{Na}]^+$  410.0591, found 410.0590.

### 1-(*p*-tolyl)pent-4-en-1-one O-perfluorobenzoyl oxime (1d)

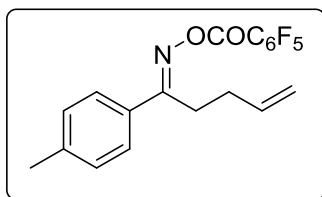

**1d:** ( 78%, 3.0 g, white solid; m.p. 43-45 °C);  $^1\text{H NMR}$  (400 MHz, Chloroform-*d*)  $\delta$  7.68 – 7.62 (m, 2H), 7.24 (d,  $J = 8.0$  Hz, 2H), 5.80 (td,  $J = 16.9, 6.6$  Hz, 1H), 5.09 – 4.97 (m, 2H), 3.01 – 2.93 (m, 2H), 2.40 (s, 3H), 2.35 – 2.28 (m, 2H);  $^{13}\text{C NMR}$  (151 MHz, Chloroform-*d*)  $\delta$  167.9, 156.5, 146.4 (d,  $J = 14.7$  Hz), 144.5 (d,  $J = 72.7$  Hz), 142.6 (d,  $J = 26.7$  Hz), 141.6, 138.7 (d,  $J = 34.3$  Hz), 137.0 (d,  $J = 34.3$  Hz), 136.2, 130.1, 129.5, 127.4, 115.9, 107.2 (d,  $J = 32.6$  Hz), 30.8, 28.0, 21.3;  $^{19}\text{F NMR}$  (376 MHz, Chloroform-*d*)  $\delta$  -136.90 – -137.58 (m), -147.65 (tt,  $J = 21.0, 4.9$  Hz), -159.43 – -160.29 (m); **HRMS** (ESI):  $m/z$  calcd for  $\text{C}_{19}\text{H}_{14}\text{F}_5\text{NO}_2$   $[\text{M}+\text{Na}]^+$  406.0842, found 406.0848.

### 1-(3-Chlorophenyl)pent-4-en-1-one O-perfluorobenzoyl oxime (1f)

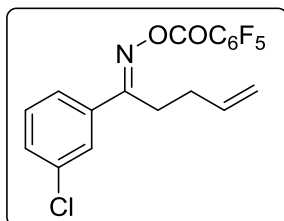

**1f:** (86%, 3.4 g, white solid; m.p. 86-88 °C);  $^1\text{H NMR}$  (400 MHz, Chloroform-*d*)  $\delta$  7.74 (s, 1H), 7.62 (d,  $J = 7.8$  Hz, 1H), 7.47 (d,  $J = 8.1$  Hz, 1H), 7.43 – 7.34 (m, 1H), 5.78 (dt,  $J = 16.7, 9.2, 4.5$  Hz, 1H), 5.10 – 4.97 (m, 2H), 3.02 – 2.91 (m, 2H), 2.33 (q,  $J = 7.6$  Hz, 2H);  $^{13}\text{C NMR}$  (151 MHz, Chloroform-*d*)  $\delta$  167.2, 156.4, 146.6 (d,  $J = 26.9$  Hz), 144.7 (d,  $J = 67.7$  Hz), 142.9 (d,  $J = 26.6$  Hz), 138.8 (d,  $J = 34.7$  Hz), 137.1 (d,  $J = 34.3$  Hz), 135.9, 135.1, 135.0, 131.2, 130.2, 127.6, 125.7, 116.5, 106.9 (d,  $J = 31.4$  Hz), 30.7, 28.2;  $^{19}\text{F NMR}$  (565 MHz, Chloroform-*d*)  $\delta$  -136.53 – -137.08 (m), -147.05 (tt,  $J =$

20.9, 5.0 Hz), -159.16 – -159.76 (m); **HRMS** (ESI):  $m/z$  calcd for  $C_{18}H_{11}ClF_5NO_2$   $[M+Na]^+$  426.0296, found 426.0296.

### 1-(3-Methoxyphenyl)pent-4-en-1-one O-perfluorobenzoyl oxime (1g)

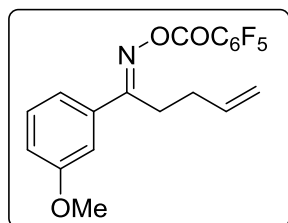

**1g**: ( 77%, 3.0 g, white solid; m.p. 43-44 °C)  **$^1H$  NMR** (400 MHz, Chloroform-*d*)  $\delta$  7.34 (t,  $J$  = 9.1 Hz, 1H), 7.30 (s, 2H), 7.02 (d,  $J$  = 8.1 Hz, 1H), 5.86 – 5.72 (m, 1H), 5.02 (t,  $J$  = 13.0 Hz, 2H), 3.84 (s, 3H), 2.97 (t,  $J$  = 9.3 Hz, 2H), 2.33 (q,  $J$  = 7.6 Hz, 2H);  **$^{13}C$  NMR** (151 MHz, Chloroform-*d*)  $\delta$  168.2, 159.9, 156.6, 146.5 (d,  $J$  = 17.8 Hz), 144.7 (d,  $J$  = 71.1 Hz), 142.8 (d,  $J$  = 26.6 Hz), 138.8 (d,  $J$  = 34.3 Hz), 137.1 (d,  $J$  = 34.4 Hz), 136.2, 134.5, 130.0, 120.0, 117.1, 116.3, 112.8, 107.2 (d,  $J$  = 31.3 Hz), 55.5, 30.9, 28.5;  **$^{19}F$  NMR** (565 MHz, Chloroform-*d*)  $\delta$  -136.89 – -137.21 (m), -147.50 (tt,  $J$  = 21.0, 4.9 Hz), -159.34 – -159.90 (m); **HRMS** (ESI):  $m/z$  calcd for  $C_{19}H_{14}F_5NO_3$   $[M+Na]^+$  422.0792, found 422.0794.

### 1-(2-Chlorophenyl)pent-4-en-1-one O-perfluorobenzoyl oxime (1h)

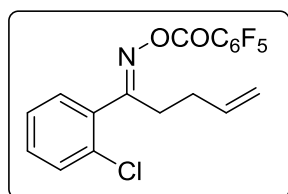

**1h**: ( 67%, 2.7 g, white solid; m.p. 42-43 °C);  **$^1H$  NMR** (600 MHz, Chloroform-*d*)  $\delta$  7.39 – 7.23 (m, 4H), 5.72 – 5.62 (m, 1H), 4.98 – 4.91 (m, 2H), 2.99 – 2.93 (m, 2H), 2.17 (q,  $J$  = 8.6, 7.8 Hz, 2H);  **$^{13}C$  NMR** (151 MHz, Chloroform-*d*)  $\delta$  169.8, 156.5, 146.6 (d,  $J$  = 27.1 Hz), 144.7 (d,  $J$  = 44.0 Hz), 142.8 (d,  $J$  = 26.4 Hz), 138.8 (d,  $J$  = 29.0 Hz), 137.1 (d,  $J$  = 30.3 Hz), 136.1, 133.2, 132.7, 131.2, 131.0, 130.1, 127.0, 116.2, 106.9 (d,  $J$  = 29.4 Hz), 30.6, 29.7;  **$^{19}F$  NMR** (565 MHz, Chloroform-*d*)  $\delta$  -136.83 (dp,  $J$  = 17.5, 5.8 Hz), -147.11 – -147.37 (m), -159.47 – -160.09 (m); **HRMS** (ESI):  $m/z$  calcd for  $C_{18}H_{11}ClF_5NO_2$   $[M+Na]^+$  426.0296, found 426.0288.

### 1-(Thiophen-2-yl)pent-4-en-1-one O-perfluorobenzoyl oxime (1k)

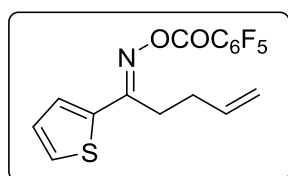

**1k**: (66%, 2.4 g, yellow solid; m.p. 103-104 °C);  **$^1H$  NMR** (400 MHz, Chloroform-*d*)  $\delta$  7.53 – 7.46 (m, 2H), 7.11 (dd,  $J$  = 5.1, 3.7 Hz, 1H), 5.83 (td,  $J$  = 16.9, 6.7 Hz, 1H), 5.16 – 4.98 (m, 2H), 3.01 – 2.92 (m, 2H), 2.48 – 2.39 (m, 2H);  **$^{13}C$  NMR** (151 MHz, Chloroform-*d*)  $\delta$  163.3, 156.4, 146.5 (d,  $J$  = 11.3 Hz), 144.9 – 144.3 (m), 138.7 (d,  $J$  = 12.9 Hz), 137.1 (d,  $J$  = 28.2 Hz), 136.2 (d,  $J$  = 10.8 Hz), 130.4, 130.2, 127.7, 116.4, 107.0 (d,  $J$  = 33.8 Hz), 31.4, 29.0;  **$^{19}F$  NMR** (565 MHz, Chloroform-*d*)  $\delta$  -136.49 – -137.65 (m), -147.37 (tt,  $J$  = 21.2, 5.1 Hz), -159.07 – -160.23 (m); **HRMS** (ESI):  $m/z$  calcd for  $C_{16}H_{10}F_5NO_2S$   $[M+Na]^+$  398.0250, found 398.0255.

### 5-Methyl-1-phenylhex-4-en-1-one O-perfluorobenzoyl oxime (1n)

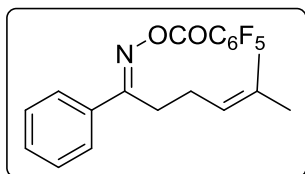

**1n:** ( 76%, 30 g, white solid; m.p. 65-66 °C);  $^1\text{H NMR}$  (600 MHz, Chloroform-*d*)  $\delta$  7.77 – 7.72 (m, 2H), 7.52 – 7.39 (m, 3H), 5.10 (tt,  $J = 7.4, 1.6$  Hz, 1H), 2.94 – 2.89 (m, 2H), 2.27 (q,  $J = 7.7$  Hz, 2H), 1.64 (s, 3H), 1.50 (s, 3H);  $^{13}\text{C NMR}$  (151 MHz, Chloroform-*d*)  $\delta$  168.7, 156.7, 146.5 (d,  $J = 18.8$  Hz), 144.6 (d,  $J = 65.9$  Hz), 142.7 (d,  $J = 17.5$  Hz), 138.8 (d,  $J = 28.9$  Hz), 137.1 (d,  $J = 34.2$  Hz), 133.8, 133.3, 131.1, 128.9, 127.6, 122.1, 107.3 (d,  $J = 32.5$  Hz), 29.1, 25.7, 25.4, 17.6;  $^{19}\text{F NMR}$  (376 MHz, Chloroform-*d*)  $\delta$  -136.67 – -137.76 (m), -147.65 (tt,  $J = 21.0, 4.8$  Hz), -159.24 – -160.33 (m); **HRMS** (ESI):  $m/z$  calcd for  $\text{C}_{20}\text{H}_{16}\text{F}_5\text{NO}_2$   $[\text{M}+\text{Na}]^+$  420.0999, found 420.0997.

### Thietan-3-one O-perfluorobenzoyl oxime (4h)

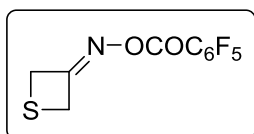

**4h:** ( 60%, 1.7 g, yellow solid; m.p. 88-90 °C);  $^1\text{H NMR}$  (600 MHz, Chloroform-*d*)  $\delta$  4.24 – 4.18 (m, 4H);  $^{13}\text{C NMR}$  (151 MHz, Chloroform-*d*)  $\delta$  163.9, 156.0, 146.6 (d,  $J = 16.4$  Hz), 144.8 (d,  $J = 25.9$  Hz), 143.0 (d,  $J = 26.6$  Hz), 138.8 (d,  $J = 28.6$  Hz), 137.1 (d,  $J = 33.3$  Hz), 106.3 (d,  $J = 31.4$  Hz), 35.4 (d,  $J = 13.5$  Hz);  $^{19}\text{F NMR}$  (376 MHz, Chloroform-*d*)  $\delta$  -136.33 – -137.22 (m), -146.72 (tt,  $J = 20.9, 5.2$  Hz), -159.23 – -159.73 (m); **HRMS** (ESI):  $m/z$  calcd for  $\text{C}_{10}\text{H}_4\text{F}_5\text{NO}_2\text{S}$   $[\text{M}+\text{Na}]^+$  319.9781, found 319.9783.

### 2-phenylcycloheptan-1-one O-perfluorobenzoyl oxime (4l)

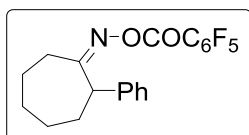

**4l:** (33%, 1.3g, transparent oil);  $^1\text{H NMR}$  (400 MHz, Chloroform-*d*)  $\delta$  7.43 – 7.30 (m, 5H), 4.12 (dd,  $J = 10.9, 6.5$  Hz, 1H), 3.10 (dd,  $J = 12.6, 4.5$  Hz, 1H), 2.49 – 2.39 (m, 1H), 2.24 – 2.13 (m, 1H), 2.10 – 1.92 (m, 4H), 1.62 (d,  $J = 9.6$  Hz, 1H), 1.49 (t,  $J = 11.3$  Hz, 2H);  $^{13}\text{C NMR}$  (151 MHz, Chloroform-*d*)  $\delta$  174.71, 156.95, 146.27 (d,  $J = 17.8$  Hz), 144.41 (d,  $J = 49.9$  Hz), 142.53 (d,  $J = 9.9$  Hz), 140.54, 138.63 (d,  $J = 24.1$  Hz), 136.95 (d,  $J = 22.0$  Hz), 128.70, 127.35, 127.12, 107.40 (d,  $J = 32.5$  Hz), 48.58, 31.25, 30.73, 27.96, 26.35, 25.75.;  $^{19}\text{F NMR}$  (376 MHz, Chloroform-*d*)  $\delta$  -136.92 – -137.48 (m), -148.08 (t,  $J = 20.9$  Hz), -159.98 (dd,  $J = 20.8, 14.3$  Hz); **HRMS** (ESI):  $m/z$  calcd for  $\text{C}_{20}\text{H}_{16}\text{F}_5\text{NO}_2$   $[\text{M}+\text{Na}]^+$  420.0998, found 420.0996.

### 5-Phenyl-2-((phenylselanyl)methyl)-3,4-dihydro-2H-pyrrole (3a)

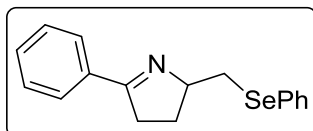

**3a:** (Method A: 90%, 56.9 mg, Method B: 80%, 50.4 mg; yellow oil; NMR data are in accordance with literature values<sup>[15]</sup>);  $^1\text{H NMR}$  (400 MHz, Chloroform-*d*)  $\delta$  7.84 –

7.75 (m, 2H), 7.60 – 7.52 (m, 2H), 7.41 (dd,  $J = 9.1, 6.9$  Hz, 3H), 7.24 (d,  $J = 6.8$  Hz, 3H), 4.58 – 4.47 (m, 1H), 3.47 (dd,  $J = 12.0, 4.7$  Hz, 1H), 3.09 (dd,  $J = 12.1, 7.9$  Hz, 2H), 2.99 – 2.85 (m, 1H), 2.29 (dt,  $J = 8.0, 2.5$  Hz, 1H), 1.88 – 1.74 (m, 1H);  $^{13}\text{C}$  NMR (101 MHz, Chloroform-*d*)  $\delta$  173.5, 134.4, 132.7, 130.7, 129.13, 128.5, 127.9, 126.9, 125.9, 73.0, 35.5, 34.5, 28.7.

### 5-(4-Chlorophenyl)-2-((phenylselanyl)methyl)-3,4-dihydro-2H-pyrrole (3b)

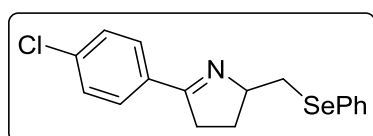

**3b:** (Method A: 66%, 46.1 mg, yellow oil);  $^1\text{H}$  NMR (400 MHz, Chloroform-*d*)  $\delta$  7.72 (d,  $J = 8.6$  Hz, 2H), 7.54 (dd,  $J = 7.6, 1.9$  Hz, 2H), 7.36 (d,  $J = 8.6$  Hz, 2H), 7.25 – 7.18 (m, 3H), 4.52 (s, 1H), 3.43 (dd,  $J = 12.1, 4.8$  Hz, 1H), 3.17 – 2.98 (m, 2H), 2.96 – 2.82 (m, 1H), 2.36 – 2.22 (m, 1H), 1.88 – 1.74 (m, 1H);  $^{13}\text{C}$  NMR (151 MHz, Chloroform-*d*)  $\delta$  172.4, 136.8, 132.9, 132.7, 130.6, 129.2, 129.2, 128.8, 126.9, 73.1, 35.5, 34.5, 28.8; HRMS (ESI):  $m/z$  calcd for  $\text{C}_{17}\text{H}_{16}\text{ClNSe}$   $[\text{M}+\text{H}]^+$  350.0214, found 350.0214.

### 5-(4-Fluorophenyl)-2-((phenylselanyl)methyl)-3,4-dihydro-2H-pyrrole (3c)

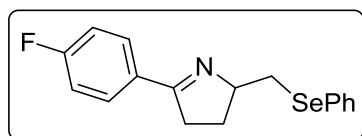

**3c:** (Method A: 78%, 51.9 mg, yellow oil);  $^1\text{H}$  NMR (600 MHz, Chloroform-*d*)  $\delta$  7.79 (dd,  $J = 8.7, 5.6$  Hz, 2H), 7.58 – 7.54 (m, 2H), 7.24 (d,  $J = 7.3$  Hz, 3H), 7.08 (t,  $J = 8.6$  Hz, 2H), 4.52 (d,  $J = 6.4$  Hz, 1H), 3.45 (dd,  $J = 12.1, 4.8$  Hz, 1H), 3.16 – 3.01 (m, 2H), 2.94 – 2.85 (m, 1H), 2.34 – 2.25 (m, 1H), 1.86 – 1.77 (m, 1H);  $^{13}\text{C}$  NMR (151 MHz, Chloroform-*d*)  $\delta$  172.2, 164.3 (d,  $J = 250.7$  Hz), 132.7, 130.7 (d,  $J = 3.2$  Hz), 130.7, 129.9 (d,  $J = 8.7$  Hz), 129.1, 126.9, 115.5 (d,  $J = 21.7$  Hz), 73.0, 35.5, 34.5, 28.8;  $^{19}\text{F}$  NMR (565 MHz, Chloroform-*d*)  $\delta$  -109.68 – -109.86 (m); HRMS (ESI):  $m/z$  calcd for  $\text{C}_{17}\text{H}_{16}\text{FNSe}$   $[\text{M}+\text{H}]^+$  334.0510, found 334.0516.

### 2-((Phenylselanyl)methyl)-5-(p-tolyl)-3,4-dihydro-2H-pyrrole (3d)

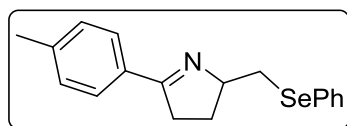

**3d:** (Method A: 85%, 55.9 mg, yellow solid; m.p. 44-45 °C);  $^1\text{H}$  NMR (600 MHz, Chloroform-*d*)  $\delta$  7.71 (s, 2H), 7.58 – 7.53 (m, 2H), 7.27 – 7.18 (m, 5H), 4.54 – 4.46 (m, 1H), 3.48 (dd,  $J = 12.1, 4.7$  Hz, 1H), 3.11 – 3.01 (m, 2H), 2.90 (dt,  $J = 17.1, 8.7$  Hz, 1H), 2.38 (s, 3H), 2.32 – 2.23 (m, 1H), 1.84 – 1.74 (m, 1H);  $^{13}\text{C}$  NMR (151 MHz, Chloroform-*d*)  $\delta$  173.3, 140.9, 132.7, 131.7, 130.7, 129.2, 129.1, 127.9, 126.8, 72.8, 35.4, 34.5, 28.7, 21.6; HRMS (ESI):  $m/z$  calcd for  $\text{C}_{18}\text{H}_{19}\text{NSe}$   $[\text{M}+\text{H}]^+$  330.0761, found 330.0768.

### 5-(4-Methoxyphenyl)-2-((phenylselanyl)methyl)-3,4-dihydro-2H-pyrrole (3e)

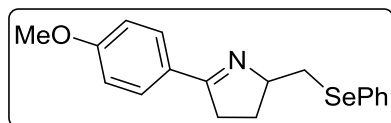

**3e:** (Method A: 81%, 56.0 mg, yellow solid; m.p. 68-69 °C);  $^1\text{H NMR}$  (400 MHz, Chloroform-*d*)  $\delta$  7.75 (d,  $J = 8.8$  Hz, 2H), 7.55 (d,  $J = 7.9$  Hz, 2H), 7.23 (d,  $J = 7.1$  Hz, 3H), 6.90 (d,  $J = 8.8$  Hz, 2H), 4.54 – 4.43 (m, 1H), 3.84 (s, 3H), 3.46 (dd,  $J = 12.0, 4.7$  Hz, 1H), 3.13 – 2.98 (m, 2H), 2.95 – 2.81 (m, 1H), 2.32 – 2.22 (m, 1H), 1.77 (d,  $J = 23.5$  Hz, 1H);  $^{13}\text{C NMR}$  (151 MHz, Chloroform-*d*)  $\delta$  172.9, 161.7, 132.7, 130.7, 129.6, 129.1, 127.1, 126.8, 113.8, 72.7, 55.5, 35.4, 34.6, 28.8; **HRMS** (ESI):  $m/z$  calcd for  $\text{C}_{18}\text{H}_{19}\text{NOSe}$   $[\text{M}+\text{H}]^+$  346.0710, found 346.0711.

### 5-(3-Chlorophenyl)-2-((phenylselanyl)methyl)-3,4-dihydro-2H-pyrrole (3f)

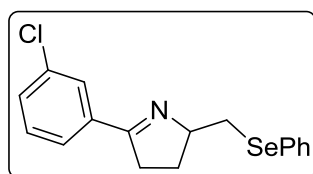

**3f:** (Method A: 78%, 54.4 mg, yellow oil);  $^1\text{H NMR}$  (400 MHz, Chloroform-*d*)  $\delta$  7.79 (s, 1H), 7.63 (d,  $J = 7.7$  Hz, 1H), 7.55 (d,  $J = 7.8$  Hz, 2H), 7.42 – 7.18 (m, 5H), 4.53 (t,  $J = 6.8$  Hz, 1H), 3.43 (dd,  $J = 12.2, 4.9$  Hz, 1H), 3.18 – 2.96 (m, 2H), 2.93 – 2.80 (m, 1H), 2.34 – 2.21 (m, 1H), 1.88 – 1.76 (m, 1H);  $^{13}\text{C NMR}$  (101 MHz, Chloroform-*d*)  $\delta$  172.3, 136.2, 134.7, 132.8, 130.6, 130.6, 129.8, 129.2, 128.0, 127.0, 126.1, 73.2, 35.5, 34.4, 28.7; **HRMS** (ESI):  $m/z$  calcd for  $\text{C}_{17}\text{H}_{16}\text{ClNSe}$   $[\text{M}+\text{H}]^+$  350.0214, found 350.0224.

### 5-(3-Methoxyphenyl)-2-((phenylselanyl)methyl)-3,4-dihydro-2H-pyrrole (3g)

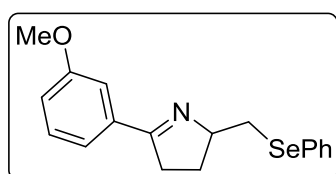

**3g:** (Method A: 80%, 55.2 mg, yellow oil);  $^1\text{H NMR}$  (400 MHz, Chloroform-*d*)  $\delta$  7.59 – 7.50 (m, 2H), 7.40 (s, 1H), 7.36 – 7.27 (m, 2H), 7.23 (d,  $J = 6.6$  Hz, 3H), 6.98 (d,  $J = 7.8$  Hz, 1H), 4.58 – 4.47 (m, 1H), 3.84 (s, 3H), 3.47 (dd,  $J = 12.1, 4.6$  Hz, 1H), 3.06 (t,  $J = 12.3$  Hz, 2H), 2.98 – 2.84 (m, 1H), 2.35 – 2.22 (m, 1H), 1.83 (d,  $J = 16.9$  Hz, 1H);  $^{13}\text{C NMR}$  (101 MHz, Chloroform-*d*)  $\delta$  173.5, 159.8, 135.8, 132.8, 130.7, 129.5, 129.1, 126.9, 120.7, 117.2, 112.3, 73.0, 55.5, 35.6, 34.5, 28.7; **HRMS** (ESI):  $m/z$  calcd for  $\text{C}_{18}\text{H}_{19}\text{NOSe}$   $[\text{M}+\text{H}]^+$  346.0710, found 346.0713.

### 5-(2-Chlorophenyl)-2-((phenylselanyl)methyl)-3,4-dihydro-2H-pyrrole (3h)

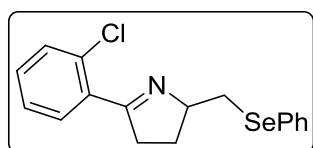

**3h:** (Method A: 74%, 51.6 mg, yellow oil);  $^1\text{H NMR}$  (400 MHz, Chloroform-*d*)  $\delta$  7.58 (d,  $J = 6.8$  Hz, 2H), 7.53 (d,  $J = 7.5$  Hz, 1H), 7.39 (d,  $J = 7.8$  Hz, 1H), 7.31 (dd,  $J = 16.0, 8.0$  Hz, 5H), 4.47 (d,  $J = 13.8$  Hz, 1H), 3.49 (dd,  $J = 12.1, 4.8$  Hz, 1H), 3.20 – 2.98 (m, 3H), 2.38 – 2.25 (m, 1H), 1.90 – 1.76 (m, 1H);  $^{13}\text{C NMR}$  (101 MHz, Chloroform-*d*)  $\delta$  174.6, 135.3, 132.6, 132.5, 130.6, 130.6, 130.5, 130.2,



129.2, 126.9, 126.9, 72.6, 39.0, 34.0, 29.5; **HRMS** (ESI):  $m/z$  calcd for C<sub>17</sub>H<sub>16</sub>ClNSe [M+H]<sup>+</sup> 350.0214, found 350.0214.

### 5-(2-Methoxyphenyl)-2-((phenylselanyl)methyl)-3,4-dihydro-2H-pyrrole (3i)

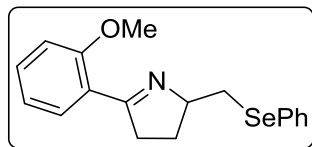

**3i**: (**Method A**: 68%, 47.0 mg, yellow oil); **<sup>1</sup>H NMR** (400 MHz, Chloroform-*d*)  $\delta$  7.72 – 7.68 (m, 1H), 7.56 (d,  $J$  = 9.6 Hz, 2H), 7.40 – 7.33 (m, 1H), 7.22 (d,  $J$  = 6.0 Hz, 2H), 6.99 – 6.88 (m, 2H), 4.46 – 4.34 (m, 1H), 3.84 (s, 3H), 3.48 (dd,  $J$  = 12.0, 4.6 Hz, 1H), 3.18 – 2.93 (m, 3H), 2.31 – 2.17 (m, 1H), 1.82 – 1.68 (m, 1H); **<sup>13</sup>C NMR** (101 MHz, Chloroform-*d*)  $\delta$  174.5, 158.3, 132.6, 131.5, 130.8, 130.3, 129.14, 126.8, 124.7, 120.8, 111.4, 71.7, 55.6, 38.9, 34.3, 29.3; **HRMS** (ESI):  $m/z$  calcd for C<sub>18</sub>H<sub>19</sub>NSe [M+H]<sup>+</sup> 346.0710, found 346.0713.

### 5-(Naphthalen-2-yl)-2-((phenylselanyl)methyl)-3,4-dihydro-2H-pyrrole (3j)

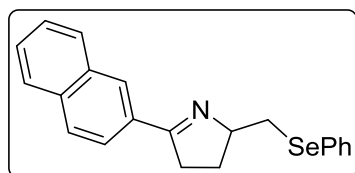

**3j**: (**Method A**: 66%, 48.2 mg, yellow solid; m.p. 76-77 °C); **<sup>1</sup>H NMR** (400 MHz, Chloroform-*d*)  $\delta$  8.18 (s, 1H), 8.06 (d,  $J$  = 8.6 Hz, 1H), 7.90 (dd,  $J$  = 17.1, 8.0 Hz, 3H), 7.63 – 7.52 (m, 4H), 7.31 – 7.26 (m, 3H), 4.60 (d,  $J$  = 13.9 Hz, 1H), 3.55 (dd,  $J$  = 12.1, 4.8 Hz, 1H), 3.32 – 3.01 (m, 3H), 2.38 (q,  $J$  = 13.3 Hz, 1H), 1.97 – 1.83 (m, 1H); **<sup>13</sup>C NMR** (101 MHz, Chloroform-*d*)  $\delta$  173.5, 134.6, 133.1, 132.8, 132.0, 130.7, 129.2, 128.9, 128.5, 128.2, 127.9, 127.3, 126.9, 126.5, 124.8, 73.1, 35.5, 34.6, 28.8; **HRMS** (ESI):  $m/z$  calcd for C<sub>21</sub>H<sub>19</sub>NSe [M+H]<sup>+</sup> 366.0761, found 366.0770.

### 2-((Phenylselanyl)methyl)-5-(thiophen-2-yl)-3,4-dihydro-2H-pyrrole (3k)

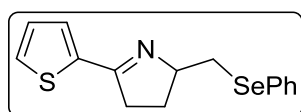

**3k**: (**Method A**: 54%, 34.7 mg, **Method B**: 68%, 43.7 mg; white oil); **<sup>1</sup>H NMR** (400 MHz, Chloroform-*d*)  $\delta$  7.53 – 7.46 (m, 2H), 7.11 (dd,  $J$  = 5.1, 3.7 Hz, 1H), 5.83 (td,  $J$  = 16.9, 6.7 Hz, 1H), 5.16 – 4.98 (m, 2H), 3.01 – 2.92 (m, 2H), 2.48 – 2.37 (m, 2H); **<sup>13</sup>C NMR** (151 MHz, Chloroform-*d*)  $\delta$  163.3, 156.4, 146.5 (d,  $J$  = 11.3 Hz), 144.7 (d,  $J$  = 44.2 Hz), 142.8, 138.7 (d,  $J$  = 12.9 Hz), 137.1 (d,  $J$  = 28.2 Hz), 136.2, 136.1, 130.4, 130.2, 127.70, 116.4, 107.0 (d,  $J$  = 33.8 Hz), 31.4, 29.0; **HRMS** (ESI):  $m/z$  calcd for C<sub>15</sub>H<sub>15</sub>NSSe [M+H]<sup>+</sup> 322.0169, found 322.0172.

### 5-(Furan-2-yl)-2-((phenylselanyl)methyl)-3,4-dihydro-2H-pyrrole (3l)

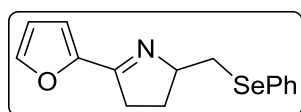

**3l**: (**Method A**: 44%, 26.8 mg, **Method B**: 60%, 36.6 mg; yellow oil); **<sup>1</sup>H NMR** (600 MHz, Chloroform-*d*)  $\delta$  7.50 – 7.46 (m, 3H), 7.17 (dd,  $J$  = 9.5, 7.0 Hz, 3H), 6.74 (d,  $J$  = 3.4 Hz, 1H), 6.41 (dd,  $J$  = 3.5, 1.7 Hz, 1H), 4.45 – 4.37 (m, 1H), 3.47 (dd,  $J$  = 12.2, 4.3

Hz, 1H), 2.94 (dd,  $J = 12.1, 8.7$  Hz, 2H), 2.76 (dt,  $J = 19.0, 9.7$  Hz, 1H), 2.25 – 2.17 (m, 1H), 1.67 (d,  $J = 7.2$  Hz, 1H);  $^{13}\text{C}$  NMR (151 MHz, Chloroform-*d*)  $\delta$  164.1, 149.9, 144.9, 132.6, 130.5, 129.2, 126.9, 113.7, 111.7, 73.1, 35.3, 34.0, 28.5; HRMS (ESI):  $m/z$  calcd for  $\text{C}_{15}\text{H}_{15}\text{NOSe}$   $[\text{M}+\text{H}]^+$  306.0397, found 306.0399.

### 5-Phenyl-2-(1-(phenylselanyl)ethyl)-3,4-dihydro-2H-pyrrole (3m)

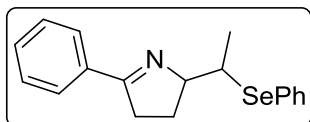

**3m:** (Method A: Reaction conditions: heating and stirring at 90 °C for 24 h, 53%, 34.8 mg, yellow oil, obtained in a diastereomer ratio greater than 20:1);  $^1\text{H}$  NMR (400 MHz, Chloroform-*d*)  $\delta$  7.83 – 7.77 (m, 2H), 7.60 – 7.56 (m, 2H), 7.38 (d,  $J = 7.7$  Hz, 3H), 7.23 (dd,  $J = 4.1, 2.3$  Hz, 3H), 4.50 – 4.40 (m, 1H), 3.85 – 3.74 (m, 1H), 3.11 – 2.83 (m, 2H), 2.22 – 2.09 (m, 1H), 1.95 (d,  $J = 10.3$  Hz, 1H), 1.38 (d,  $J = 7.0$  Hz, 3H);  $^{13}\text{C}$  NMR (101 MHz, Chloroform-*d*)  $\delta$  173.6, 134.8, 134.5, 130.7, 129.9, 129.1, 128.5, 127.9, 127.4, 77.3, 44.4, 35.8, 25.2, 17.5; HRMS (ESI):  $m/z$  calcd for  $\text{C}_{18}\text{H}_{19}\text{NSe}$   $[\text{M}+\text{H}]^+$  330.0761, found 330.0765.

### 5-Phenyl-2-(2-(phenylselanyl)propan-2-yl)-3,4-dihydro-2H-pyrrole (3n)

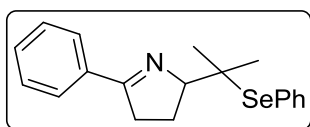

**3n:** (Method A: Reaction conditions: heating and stirring at 90 °C for 24 h, 70%, 48.0 mg, yellow oil; NMR data are in accordance with literature values<sup>[15]</sup>);  $^1\text{H}$  NMR (400 MHz, Chloroform-*d*)  $\delta$  7.69 (dd,  $J = 7.7, 1.9$  Hz, 2H), 7.56 – 7.48 (m, 2H), 7.35 – 7.16 (m, 4H), 7.15 – 7.02 (m, 2H), 4.18 – 4.08 (m, 1H), 2.95 – 2.71 (m, 2H), 2.11 – 1.86 (m, 2H), 1.36 (s, 3H), 1.26 (s, 3H);  $^{13}\text{C}$  NMR (101 MHz, Chloroform-*d*)  $\delta$  173.1, 138.6, 134.7, 130.5, 128.7 – 128.4 (m), 127.9 (d,  $J = 13.6$  Hz), 82.5, 51.9, 35.6, 28.3, 26.4, 25.6; HRMS (ESI):  $m/z$  calcd for  $\text{C}_{19}\text{H}_{21}\text{NSe}$   $[\text{M}+\text{H}]^+$  344.0918, found 344.0921.

### 2-Methyl-5-phenyl-2-((phenylselanyl)methyl)-3,4-dihydro-2H-pyrrole (3o)

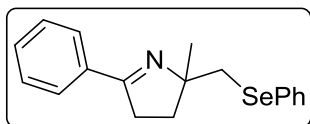

**3o:** (Method A: Reaction conditions: heating and stirring at 90 °C for 24 h, 53%, 34.9 mg, yellow oil);  $^1\text{H}$  NMR (400 MHz, Chloroform-*d*)  $\delta$  7.85 – 7.77 (m, 2H), 7.55 (dd,  $J = 7.6, 2.0$  Hz, 2H), 7.42 (dd,  $J = 9.3, 7.1$  Hz, 3H), 7.23 (q,  $J = 5.1$  Hz, 3H), 3.35 (d,  $J = 10.4$  Hz, 2H), 3.09 (t,  $J = 8.0$  Hz, 2H), 2.16 (dt,  $J = 12.9, 8.1$  Hz, 1H), 1.97 – 1.84 (m, 1H), 1.49 (s, 3H);  $^{13}\text{C}$  NMR (101 MHz, Chloroform-*d*)  $\delta$  171.4, 134.5, 132.4, 131.8, 130.5, 129.0, 128.4, 127.9, 126.6, 76.9, 41.6, 36.0, 34.1, 27.8; HRMS (ESI):  $m/z$  calcd for  $\text{C}_{18}\text{H}_{19}\text{NSe}$   $[\text{M}+\text{H}]^+$  330.0761, found 330.0767.

### 2-((Phenylselanyl)methyl)-3,3a,4,5-tetrahydro-2H-benzo(g)indole (3p)

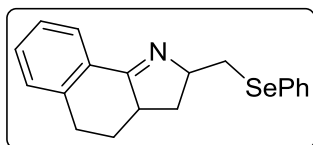

**3p:** (Method A: Reaction conditions: heating and stirring at 90 °C for 24 h, 51%, 34.8 mg, white oil, obtained in a 2.2:1 ratio of diastereomers, data are given for the mixture);  $^1\text{H NMR}$  (400 MHz, Chloroform-*d*)  $\delta$  8.08 (dd,  $J = 7.7$ , 1.4 Hz, 2H(major isomer)), 8.03 (dd,  $J = 7.9$ , 1.4 Hz, 1H(minor isomer)), 7.65 – 7.49 (m, 6H(major isomer)), 7.34 (td,  $J = 7.5$ , 1.6 Hz, 3H(minor isomer)), 7.30 – 7.03 (m, 8H(major isomer)+4H(minor isomer)), 4.64 (td,  $J = 8.6$ , 4.2 Hz, 1H(minor isomer)), 4.28 – 4.10 (m, 2H(major isomer)), 3.63 (dd,  $J = 11.9$ , 4.9 Hz, 2H(major isomer)), 3.29 (dd,  $J = 12.2$ , 4.5 Hz, 1H(minor isomer)), 3.19 – 2.76 (m, 8H(major isomer)+4H(minor isomer)), 2.54 (ddd,  $J = 12.3$ , 7.9, 6.2 Hz, 2H(minor isomer)), 2.33 – 2.19 (m, 4H(major isomer)), 1.79 (dt,  $J = 13.1$ , 9.2 Hz, 1H(minor isomer)), 1.69 (td,  $J = 12.9$ , 4.8 Hz, 2H(major isomer)), 1.65 – 1.53 (m, 1H(minor isomer)), 1.40 – 1.23 (m, 2H(major isomer));  $^{13}\text{C NMR}$  (101 MHz, Chloroform-*d*)  $\delta$  174.6, 174.1, 141.2, 132.6, 132.6, 131.6, 131.0, 130.9, 130.7, 130.6, 130.0, 123.0, 129.3, 129.1, 129.1, 129.0, 128.9, 126.9, 126.8, 126.5, 126.5, 126.2, 126.1, 71.1, 71.0, 47.9, 46.0, 37.8, 34.9, 34.63, 32.7, 30.1, 30.1, 30.0, 29.7; **HRMS** (ESI):  $m/z$  calcd for  $\text{C}_{19}\text{H}_{19}\text{NSe}$   $[\text{M}+\text{H}]^+$  342.0761, found 342.0768.

### 5-Phenyl-2-((p-tolylselanyl)methyl)-3,4-dihydro-2H-pyrrole (3r)

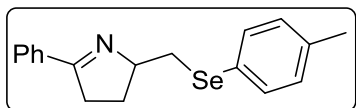

**3r:** (Method A: 57%, 37.5 mg, Method B: 66%, 43.2 mg; yellow oil);  $^1\text{H NMR}$  (600 MHz, Chloroform-*d*)  $\delta$  7.80 (d,  $J = 6.7$  Hz, 2H), 7.48 – 7.36 (m, 5H), 7.06 (d,  $J = 7.8$  Hz, 2H), 4.53 – 4.45 (m, 1H), 3.44 (dd,  $J = 12.1$ , 4.6 Hz, 1H), 3.12 – 2.99 (m, 2H), 2.96 – 2.87 (m, 1H), 2.31 (s, 4H), 1.85 – 1.76 (m, 1H);  $^{13}\text{C NMR}$  (151 MHz, Chloroform-*d*)  $\delta$  173.4, 136.9, 134.4, 133.2, 130.7, 130.0, 128.5, 127.9, 126.7, 73.0, 35.4, 34.8, 28.7, 21.2; **HRMS** (ESI):  $m/z$  calcd for  $\text{C}_{18}\text{H}_{19}\text{NSe}$   $[\text{M}+\text{H}]^+$  330.0761, found 330.0772.

### 2-(((4-Methoxyphenyl)selanyl)methyl)-5-phenyl-3,4-dihydro-2H-pyrrole (3s)

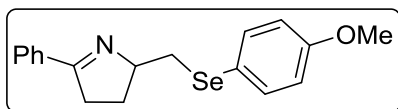

**3s:** (Method A: 14%, 9.7 mg, Method B: 55%, 38.2 mg; yellow oil);  $^1\text{H NMR}$  (400 MHz, Chloroform-*d*)  $\delta$  7.88 – 7.76 (m, 2H), 7.52 (d,  $J = 8.8$  Hz, 2H), 7.41 (t,  $J = 7.7$  Hz, 4H), 6.79 (d,  $J = 8.7$  Hz, 2H), 4.52 – 4.40 (m, 1H), 3.78 (s, 3H), 3.39 (dd,  $J = 12.1$ , 4.6 Hz, 1H), 3.14 – 3.02 (m, 1H), 3.02 – 2.84 (m, 2H), 2.33 – 2.21 (m, 1H), 1.85 – 1.74 (m, 1H);  $^{13}\text{C NMR}$  (101 MHz, Chloroform-*d*)  $\delta$  173.3, 159.3, 135.6, 134.5, 130.6, 128.5, 127.9, 120.3, 114.8, 73.1, 55.4, 35.5, 35.1, 28.7; **HRMS** (ESI):  $m/z$  calcd for  $\text{C}_{18}\text{H}_{19}\text{NOSe}$   $[\text{M}+\text{H}]^+$  346.0710, found 346.0718.

### 2-(((4-Fluorophenyl)selanyl)methyl)-5-phenyl-3,4-dihydro-2H-pyrrole (3t)

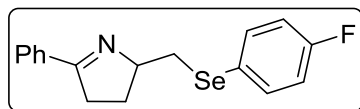

**3t:** (Method A: 18%, 10.0 mg, Method B: 58%, 38.9 mg; yellow oil);  $^1\text{H NMR}$  (400 MHz, Chloroform-*d*)  $\delta$  7.84 – 7.73 (m, 2H), 7.54 (dd,  $J = 8.6, 5.5$  Hz, 2H), 7.46 – 7.36 (m, 3H), 6.94 (t,  $J = 8.8$  Hz, 2H), 4.55 – 4.43 (m, 1H), 3.40 (dd,  $J = 12.1, 4.8$  Hz, 1H), 3.16 – 3.00 (m, 2H), 2.99 – 2.86 (m, 1H), 2.35 – 2.18 (m, 1H), 1.86 – 1.72 (m, 1H);  $^{13}\text{C NMR}$  (101 MHz, Chloroform-*d*)  $\delta$  173.5, 162.4 (d,  $J = 246.4$  Hz), 135.4 (d,  $J = 7.7$  Hz), 130.7, 128.5, 127.9, 125.0 (d,  $J = 3.5$  Hz), 116.3 (d,  $J = 21.5$  Hz), 73.0, 35.5 (d,  $J = 1.6$  Hz), 28.7;  $^{19}\text{F NMR}$  (376 MHz, Chloroform-*d*)  $\delta$  -115.10; **HRMS** (ESI):  $m/z$  calcd for  $\text{C}_{17}\text{H}_{16}\text{FNSe}$   $[\text{M}+\text{H}]^+$  334.0510, found 334.0515.

### 5-Phenyl-2-((o-tolylselanyl)methyl)-3,4-dihydro-2H-pyrrole (3u)

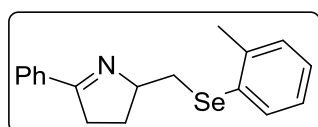

**3u:** (Method A: 58%, 38.2 mg, Method B: 52%, 34.1 mg; yellow solid, m.p. 54-55 °C);  $^1\text{H NMR}$  (600 MHz, Chloroform-*d*)  $\delta$  7.82 (d,  $J = 8.0$  Hz, 2H), 7.55 (d,  $J = 7.4$  Hz, 1H), 7.47 – 7.38 (m, 3H), 7.19 – 7.08 (m, 3H), 4.56 – 4.48 (m, 1H), 3.46 (dd,  $J = 11.9, 4.7$  Hz, 1H), 3.09 (d,  $J = 11.7$  Hz, 1H), 3.04 (d,  $J = 8.4$  Hz, 1H), 2.97 – 2.88 (m, 1H), 2.43 (s, 3H), 2.37 – 2.26 (m, 1H), 1.89 – 1.80 (m, 1H);  $^{13}\text{C NMR}$  (151 MHz, Chloroform-*d*)  $\delta$  173.4, 139.3, 134.4, 131.7, 131.7, 130.7, 130.0, 128.5, 127.9, 126.7 (d,  $J = 18.8$  Hz), 72.8, 35.4, 33.3, 28.8, 22.5; **HRMS** (ESI):  $m/z$  calcd for  $\text{C}_{18}\text{H}_{19}\text{NSe}$   $[\text{M}+\text{H}]^+$  330.0761, found 330.0766.

### 2-(((2-Methoxyphenyl)selanyl)methyl)-5-phenyl-3,4-dihydro-2H-pyrrole (3v)

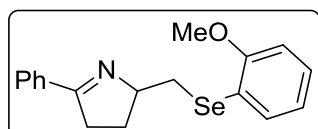

**3v:** (Method A: 54%, 37.3 mg, Method B: 43%, 29.5 mg; yellow oil);  $^1\text{H NMR}$  (600 MHz, Chloroform-*d*)  $\delta$  7.81 (d,  $J = 8.0$  Hz, 2H), 7.45 – 7.36 (m, 3H), 7.19 – 7.09 (m, 3H), 6.76 (d,  $J = 7.8$  Hz, 1H), 4.57 – 4.49 (m, 1H), 3.77 (s, 3H), 3.47 (dd,  $J = 12.1, 4.8$  Hz, 1H), 3.14 – 3.03 (m, 2H), 2.96 – 2.87 (m, 1H), 2.33 – 2.24 (m, 1H), 1.85 – 1.76 (m, 1H);  $^{13}\text{C NMR}$  (151 MHz, Chloroform-*d*)  $\delta$  173.4, 159.8, 134.4, 131.7, 130.7, 129.8, 128.5, 127.9, 124.7, 117.9, 112.6, 72.9, 55.3, 35.5, 34.4, 28.7; **HRMS** (ESI):  $m/z$  calcd for  $\text{C}_{18}\text{H}_{19}\text{NOSe}$   $[\text{M}+\text{H}]^+$  346.0710, found 346.0716.

### 2-(((Naphthalen-1-ylselanyl)methyl)-5-phenyl-3,4-dihydro-2H-pyrrole (3w)

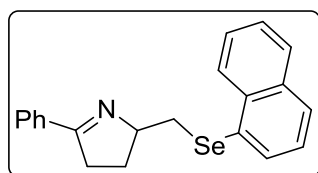

**3w:** (Method A: 53%, 38.7 mg, Method B: 69%, 50.5 mg; yellow oil);  $^1\text{H NMR}$  (400 MHz, Chloroform-*d*)  $\delta$  8.43 (d,  $J = 8.3$  Hz, 1H), 7.90 – 7.76 (m, 5H), 7.63 – 7.46 (m, 2H), 7.44 – 7.33 (m, 4H), 4.55 – 4.42 (m, 1H), 3.51 (dd,  $J = 11.9, 4.7$  Hz, 1H), 3.09 (dd,  $J = 11.9, 8.2$  Hz, 2H), 2.97 – 2.84 (m, 1H), 2.35 – 2.22 (m, 1H), 1.91 – 1.78 (m, 1H);  $^{13}\text{C NMR}$  (101 MHz,

Chloroform-*d*)  $\delta$  173.5, 134.5, 134.4, 134.1, 132.6, 130.7, 129.9, 128.7, 128.5, 128.4, 127.9, 127.8, 126.7, 126.3, 125.9, 73.1, 35.5, 34.8, 28.8; **HRMS** (ESI):  $m/z$  calcd for  $C_{21}H_{19}NSe$   $[M+H]^+$  366.0761, found 366.0765.

### 2-((Benzylselanyl)methyl)-5-phenyl-3,4-dihydro-2H-pyrrole (**3x**)

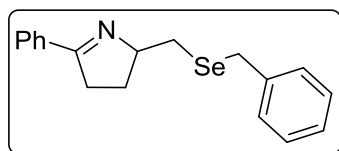

**3x**: (Method A: 58%, 38.2 mg, Method B: 73%, 48.0 mg; yellow oil);  **$^1H$  NMR** (400 MHz, Chloroform-*d*)  $\delta$  7.85 (dd,  $J = 7.8, 1.9$  Hz, 2H), 7.42 (d,  $J = 2.1$  Hz, 3H), 7.29 (dd,  $J = 9.2, 6.7$  Hz, 4H), 7.22 – 7.16 (m, 1H), 4.57 – 4.46 (m, 1H), 3.87 (s, 2H), 3.12 – 3.01 (m, 1H), 2.98 – 2.88 (m, 2H), 2.83 (dd,  $J = 12.3, 6.9$  Hz, 1H), 2.29 – 2.16 (m, 1H), 1.77 – 1.68 (m, 1H);  **$^{13}C$  NMR** (101 MHz, Chloroform-*d*)  $\delta$  173.2, 139.8, 134.5, 130.7, 129.2, 129.1, 128.6, 127.9, 126.8, 73.5, 35.5, 30.7, 28.8, 28.1; **HRMS** (ESI):  $m/z$  calcd for  $C_{18}H_{19}NSe$   $[M+H]^+$  330.0761, found 330.0765.

### 2-((Methylselanyl)methyl)-5-phenyl-3,4-dihydro-2H-pyrrole (**3y**)

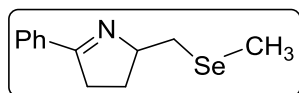

**3y**: (Method A: 47%, 23.8 mg, Method B: 54%, 27.1 mg; light yellow oil);  **$^1H$  NMR** (600 MHz, Chloroform-*d*)  $\delta$  7.84 (d,  $J = 6.5$  Hz, 2H), 7.49 – 7.37 (m, 3H), 4.57 – 4.49 (m, 1H), 3.13 – 3.05 (m, 1H), 3.02 (dd,  $J = 12.4, 4.8$  Hz, 1H), 2.97 – 2.89 (m, 1H), 2.80 (dd,  $J = 12.4, 7.4$  Hz, 1H), 2.33 – 2.22 (m, 1H), 2.06 (s, 3H), 1.84 – 1.75 (m, 1H);  **$^{13}C$  NMR** (151 MHz, Chloroform-*d*)  $\delta$  173.3, 134.5, 130.7, 128.6, 127.9, 73.4, 35.5, 32.3, 28.7, 5.4; **HRMS** (ESI):  $m/z$  calcd for  $C_{12}H_{15}NSe$   $[M+H]^+$  254.0448, found 254.0450.

### 4-(Phenylselanyl)butanenitrile (**5a**)

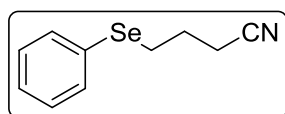

**5a**: (Method A: 86%, 38.7 mg; Method B: 98%, 44.1 mg; light yellow oil; NMR data are in accordance with literature values<sup>[16]</sup>);  **$^1H$  NMR** (400 MHz, Chloroform-*d*)  $\delta$  7.55 – 7.46 (m, 2H), 7.34 – 7.24 (m, 3H), 2.99 (t,  $J = 7.0$  Hz, 2H), 2.49 (t,  $J = 7.0$  Hz, 2H), 2.07 – 1.93 (m, 2H);  **$^{13}C$  NMR** (101 MHz, Chloroform-*d*)  $\delta$  133.4, 129.4, 128.8, 127.6, 119.2, 26.2, 25.8, 17.1.

### 3-Phenyl-4-(phenylselanyl)butanenitrile (**5b**)

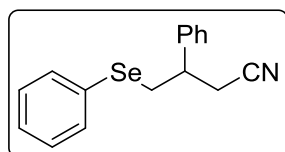

**5b**: (Method A: 76%, 45.8 mg, yellow oil; NMR data are in accordance with literature values<sup>[16]</sup>);  **$^1H$  NMR** (400 MHz, Chloroform-*d*)  $\delta$  7.51 – 7.42 (m, 2H), 7.39 – 7.21 (m, 6H), 7.18 (d,  $J = 7.9$  Hz, 2H), 3.29 (dd,  $J = 12.3, 6.2$  Hz, 1H), 3.26 – 3.07 (m, 2H), 2.86 (dd,  $J = 16.8, 5.3$  Hz, 1H), 2.75 (dd,  $J = 16.8, 7.5$  Hz, 1H);  **$^{13}C$  NMR** (101 MHz, Chloroform-*d*)  $\delta$  140.7, 133.2, 129.5, 129.1,

129.1, 128.0, 127.6, 127.2, 118.2, 42.3, 32.7, 24.2.

### 3-(Benzyloxy)-4-(phenylselanyl)butanenitrile (5c)

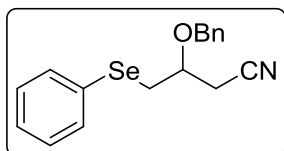

**5c:** (Method A: 60%, 38.0 mg, yellow oil; NMR data are in accordance with literature values<sup>[16]</sup>); **<sup>1</sup>H NMR** (400 MHz, Chloroform-*d*)  $\delta$  7.51 – 7.44 (m, 2H), 7.31 (dd,  $J = 16.7, 8.5$  Hz, 8H), 4.57 (d,  $J = 3.4$  Hz, 2H), 3.81 (p,  $J = 5.5$  Hz, 1H), 3.21 (dd,  $J = 13.2, 4.9$  Hz, 1H), 3.03 (dd,  $J = 13.2, 7.6$  Hz, 1H), 2.79 – 2.64 (m, 2H); **<sup>13</sup>C NMR** (101 MHz, Chloroform-*d*)  $\delta$  137.1, 133.2, 129.5, 129.1, 128.7, 128.2, 128.1, 127.7, 117.3, 74.3, 72.2, 30.9, 23.1.

### Ethyl 3-cyano-2-((phenylselanyl)methyl)propanoate (5d)

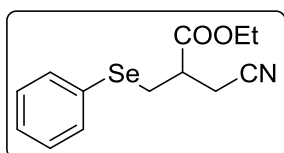

**5d:** (Method A: 50%, 29.7 mg, yellow oil; NMR data are in accordance with literature values<sup>[16]</sup>); **<sup>1</sup>H NMR** (600 MHz, Chloroform-*d*)  $\delta$  7.57 – 7.51 (m, 2H), 7.33 – 7.26 (m, 3H), 4.11 (ddq,  $J = 41.3, 10.7, 7.1$  Hz, 2H), 3.33 (dd,  $J = 13.1, 5.6$  Hz, 1H), 3.13 (dd,  $J = 13.2, 7.4$  Hz, 1H), 2.98 – 2.91 (m, 1H), 2.80 (dd,  $J = 6.5, 0.9$  Hz, 2H), 1.24 (t,  $J = 7.1$  Hz, 3H); **<sup>13</sup>C NMR** (151 MHz, Chloroform-*d*)  $\delta$  171.0, 133.8, 129.6, 128.4, 128.1, 117.5, 62.0, 42.2, 28.2, 19.4, 14.2.

### 4-(Phenylselanyl)pentanenitrile (5e)

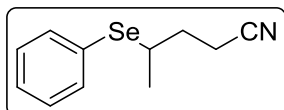

**5e:** (Method A: 74%, 35.4 mg, yellow oil); **<sup>1</sup>H NMR** (400 MHz, Chloroform-*d*)  $\delta$  7.50 – 7.43 (m, 2H), 7.21 (p,  $J = 7.6, 7.2$  Hz, 3H), 3.21 (h,  $J = 6.9$  Hz, 1H), 2.45 (td,  $J = 7.3, 5.1$  Hz, 2H), 1.82 (t,  $J = 7.2$  Hz, 2H), 1.36 (d,  $J = 6.9$  Hz, 3H); **<sup>13</sup>C NMR** (101 MHz, Chloroform-*d*)  $\delta$  135.6, 129.2, 128.2, 127.6, 119.4, 37.9, 32.96, 22.0, 15.9; **HRMS** (ESI):  $m/z$  calcd for C<sub>10</sub>H<sub>11</sub>NSe [M+H]<sup>+</sup> 240.0291, found 240.0287.

### 5-Phenyl-4-(phenylselanyl)pentanenitrile (5f)

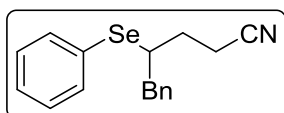

**5f:** (Method A: 83%, 52.3 mg, yellow oil); **<sup>1</sup>H NMR** (400 MHz, Chloroform-*d*)  $\delta$  7.61 – 7.53 (m, 2H), 7.40 – 7.26 (m, 6H), 7.19 (d,  $J = 6.8$  Hz, 2H), 3.48 – 3.37 (m, 1H), 3.18 (dd,  $J = 14.1, 6.3$  Hz, 1H), 2.89 (dd,  $J = 14.1, 8.8$  Hz, 1H), 2.67 – 2.54 (m, 2H), 2.11 – 1.95 (m, 1H), 1.86 – 1.72 (m, 1H); **<sup>13</sup>C NMR** (101 MHz, Chloroform-*d*)  $\delta$  138.8, 135.6, 129.4, 129.1, 128.7, 128.3, 127.7, 126.9, 119.3, 45.5, 42.5, 30.0, 16.0; **HRMS** (ESI):  $m/z$  calcd for C<sub>17</sub>H<sub>17</sub>NSe [M+H]<sup>+</sup> 316.0604, found 316.0608.

## 2-((Phenylselanyl)methoxy)acetonitrile (5g)

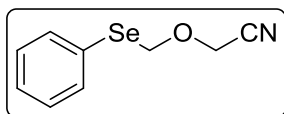

**5g:** (Method A: 78%, 35.4 mg, yellow oil; NMR data are in accordance with literature values<sup>[16]</sup>); **<sup>1</sup>H NMR** (400 MHz, Chloroform-*d*)  $\delta$  7.61 – 7.53 (m, 2H), 7.36 – 7.27 (m, 3H), 5.35 (s, 2H), 4.45 (s, 2H); **<sup>13</sup>C NMR** (101 MHz, Chloroform-*d*)  $\delta$  133.1, 129.5, 129.1, 128.0, 115.3, 71.8, 53.3.

## 2-(((Phenylselanyl)methyl)thio)acetonitrile (5h)

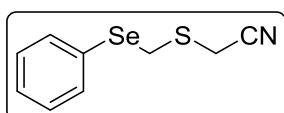

**5h:** (Method A: 62%, 30.1 mg, yellow oil); **<sup>1</sup>H NMR** (400 MHz, Chloroform-*d*)  $\delta$  7.62 – 7.55 (m, 2H), 7.39 – 7.27 (m, 3H), 4.13 (s, 2H), 3.49 (s, 2H); **<sup>13</sup>C NMR** (101 MHz, Chloroform-*d*)  $\delta$  134.1, 129.5, 128.5, 128.4, 116.7, 29.9, 17.7; **HRMS** (ESI): *m/z* calcd for C<sub>9</sub>H<sub>9</sub>NSSe [M+H]<sup>+</sup> 243.9699, found 243.9703.

## 5-(Phenylselanyl)hexanenitrile (5i)

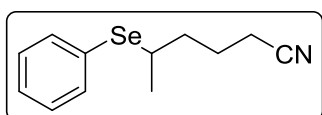

**5i:** (Method A: 79%, 38.5 mg; light yellow oil); **<sup>1</sup>H NMR** (400 MHz, Chloroform-*d*)  $\delta$  7.59 – 7.52 (m, 2H), 7.30 (t, *J* = 5.3 Hz, 3H), 3.25 (h, *J* = 6.7 Hz, 1H), 2.33 (t, *J* = 6.9 Hz, 2H), 1.83 (p, *J* = 6.5, 6.0 Hz, 2H), 1.78 – 1.69 (m, 2H), 1.43 (d, *J* = 6.9 Hz, 3H); **<sup>13</sup>C NMR** (101 MHz, Chloroform-*d*)  $\delta$  135.3, 129.1, 128.5, 127.8, 119.5, 38.6, 36.4, 23.8, 22.3, 17.0; **HRMS** (ESI): *m/z* calcd for C<sub>12</sub>H<sub>15</sub>NSSe [M+H]<sup>+</sup> 254.0448, found 254.0446.

## 6-Phenyl-6-(phenylselanyl)hexanenitrile (5k)

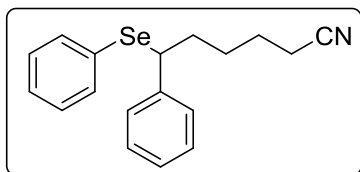

**5k:** (Method A: 77%, 50.7 mg; yellow oil); **<sup>1</sup>H NMR** (400 MHz, CDCl<sub>3</sub>)  $\delta$  7.42 – 7.35 (m, 2H), 7.27 (d, *J* = 3.2 Hz, 1H), 7.26 – 7.22 (m, 3H), 7.20 (dt, *J* = 5.4, 2.4 Hz, 2H), 7.16 (dd, *J* = 5.3, 3.1 Hz, 2H), 4.23 – 4.17 (m, 1H), 2.29 – 2.21 (m, 2H), 2.14 – 1.97 (m, 2H), 1.69 – 1.56 (m, 2H), 1.53 – 1.36 (m, 2H); **<sup>13</sup>C NMR** (101 MHz, CDCl<sub>3</sub>)  $\delta$  141.8, 135.5, 129.3, 128.8, 128.4, 127.9, 127.6, 127.1, 119.4, 47.9, 35.2, 27.5, 25.0, 17.0; **HRMS** (ESI): *m/z* calcd for C<sub>18</sub>H<sub>19</sub>NSe [M+Na]<sup>+</sup> 352.0576, found 352.0587.

## 7-phenyl-7-(phenylselanyl)heptanenitrile (5l)

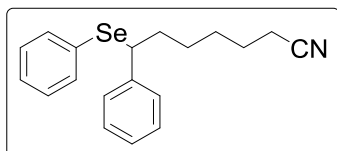

**5l:** (Method A: 78%, 53.2 mg; yellow oil); **<sup>1</sup>H NMR** (400 MHz, Chloroform-*d*)  $\delta$  7.43 – 7.37 (m, 2H), 7.30 – 7.16 (m, 8H), 4.23 (dd, *J* = 9.0, 6.4 Hz, 1H), 2.27 (t, *J* =

7.1 Hz, 2H), 2.13 – 1.99 (m, 2H), 1.62 – 1.55 (m, 2H), 1.43 (dd,  $J = 14.1, 6.4$  Hz, 2H), 1.37 – 1.27 (m, 2H);  $^{13}\text{C}$  NMR (101 MHz, Chloroform-*d*)  $\delta$  142.26, 135.56, 129.54, 128.90, 128.45, 127.92, 127.76, 127.06, 119.74, 48.37, 35.77, 28.27, 27.59, 25.21, 17.11; HRMS (ESI):  $m/z$  calcd for  $\text{C}_{11}\text{H}_{13}\text{NSe}$   $[\text{M}+\text{Na}]^+$  366.0736, found 366.0733.

#### 4-(*p*-Tolylselanyl)butanenitrile (5m)

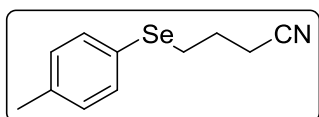

**5m:** (Method A: 30%, 14.3 mg, Method B: 84%, 40.2 mg; yellow oil);  $^1\text{H}$  NMR (600 MHz, Chloroform-*d*)  $\delta$  7.41 (d,  $J = 8.0$  Hz, 2H), 7.10 (d,  $J = 7.8$  Hz, 2H), 2.94 (t,  $J = 7.0$  Hz, 2H), 2.49 (t,  $J = 7.1$  Hz, 2H), 2.33 (s, 3H), 1.97 (p,  $J = 7.0$  Hz, 2H);  $^{13}\text{C}$  NMR (151 MHz, Chloroform-*d*)  $\delta$  137.9, 133.9, 130.3, 124.9, 119.2, 26.5, 25.8, 21.3, 17.1; HRMS (ESI):  $m/z$  calcd for  $\text{C}_{11}\text{H}_{13}\text{NSe}$   $[\text{M}+\text{H}]^+$  240.0291, found 240.0292.

#### 4-((4-Methoxyphenyl)selanyl)butanenitrile (5n)

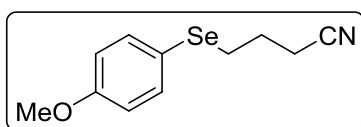

**5n:** (Method A: 94%, 47.9 mg, Method B: 54%, 27.6 mg; yellow oil; NMR data are in accordance with literature values<sup>[17]</sup>);  $^1\text{H}$  NMR (600 MHz, Chloroform-*d*)  $\delta$  7.51 – 7.43 (m, 2H), 6.85 – 6.78 (m, 2H), 3.79 (s, 3H), 2.88 (t,  $J = 7.0$  Hz, 2H), 2.48 (t,  $J = 7.1$  Hz, 2H), 1.93 (p,  $J = 7.1$  Hz, 2H);  $^{13}\text{C}$  NMR (151 MHz, Chloroform-*d*)  $\delta$  159.8, 136.2, 119.2, 118.5, 115.1, 55.4, 27.1, 25.7, 17.0.

#### 4-((4-Fluorophenyl)selanyl)butanenitrile (5o)

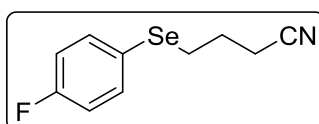

**5o:** (Method A: 45%, 21.9 mg, Method B: 54%, 26.0 mg; yellow oil);  $^1\text{H}$  NMR (600 MHz, Chloroform-*d*)  $\delta$  7.56 – 7.46 (m, 2H), 7.04 – 6.94 (m, 2H), 2.94 (t,  $J = 7.0$  Hz, 2H), 2.50 (t,  $J = 7.0$  Hz, 2H), 1.97 (p,  $J = 7.0$  Hz, 2H);  $^{13}\text{C}$  NMR (151 MHz, Chloroform-*d*)  $\delta$  162.8 (d,  $J = 247.9$  Hz), 136.1 (d,  $J = 7.9$  Hz), 123.2 (d,  $J = 3.3$  Hz), 119.1, 116.7 (d,  $J = 21.5$  Hz), 27.0, 25.8, 17.1;  $^{19}\text{F}$  NMR (376 MHz, Chloroform-*d*)  $\delta$  -113.70; HRMS (ESI):  $m/z$  calcd for  $\text{C}_{10}\text{H}_{10}\text{FNSe}$   $[\text{M}+\text{H}]^+$  244.0040, found 244.0042.

#### 4-(*o*-Tolylselanyl)butanenitrile (5p)

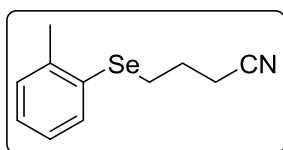

**5p:** (Method A: 64%, 30.6 mg, Method B: 54%, 25.8 mg; yellow oil; NMR data are in accordance with literature values<sup>[17]</sup>);  $^1\text{H}$  NMR (600 MHz, Chloroform-*d*)  $\delta$  7.43 (dd,  $J = 7.7, 1.4$  Hz, 1H), 7.24 – 7.16 (m, 2H), 7.12 (t,  $J = 7.5$  Hz, 1H), 2.97 (t,  $J = 7.0$  Hz, 2H), 2.50 (t,  $J = 7.0$  Hz, 2H), 2.43 (s, 3H), 2.00 (p,  $J = 7.0$  Hz,



2H);  $^{13}\text{C}$  NMR (151 MHz, Chloroform-*d*)  $\delta$  140.0, 132.3, 130.4, 129.9, 127.5, 126.8, 119.1, 25.7, 24.9, 22.5, 17.3.

#### 4-((2-Methoxyphenyl)selanyl)butanenitrile (5q)

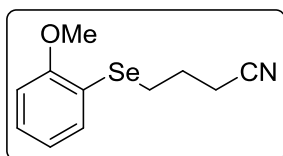

**5q:** (Method A: 20%, 10.2 mg, Method B: 34%, 17.3 mg; yellow oil);  $^1\text{H}$  NMR (600 MHz, Chloroform-*d*)  $\delta$  7.22 – 7.15 (m, 1H), 7.09 – 7.02 (m, 2H), 6.81 (ddd,  $J = 8.2, 2.6, 0.9$  Hz, 1H), 3.80 (s, 3H), 2.99 (t,  $J = 7.0$  Hz, 2H), 2.49 (t,  $J = 7.0$  Hz, 2H), 2.05 – 1.93 (m, 2H);  $^{13}\text{C}$  NMR (151 MHz, Chloroform-*d*)  $\delta$  160.0, 130.2, 129.8, 125.2, 119.2, 118.6, 113.2, 55.4, 26.0, 25.8, 17.1; HRMS (ESI):  $m/z$  calcd for  $\text{C}_{11}\text{H}_{13}\text{NOSe}$   $[\text{M}+\text{H}]^+$  256.0240, found 256.0244.

#### 4-(Naphthalen-1-ylselanyl)butanenitrile (5r)

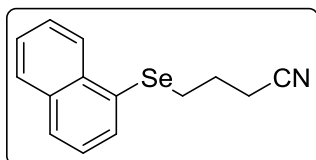

**5r:** (Method A: 55%, 30.3 mg, Method B: 74%, 40.6 mg; yellow oil);  $^1\text{H}$  NMR (400 MHz, Chloroform-*d*)  $\delta$  8.40 (d,  $J = 8.3$  Hz, 1H), 7.89 – 7.76 (m, 3H), 7.61 – 7.49 (m, 2H), 7.39 (t,  $J = 7.7$  Hz, 1H), 3.02 (t,  $J = 7.0$  Hz, 2H), 2.48 (t,  $J = 7.1$  Hz, 2H), 1.92 (q,  $J = 7.0$  Hz, 2H);  $^{13}\text{C}$  NMR (101 MHz, Chloroform-*d*)  $\delta$  134.5, 134.2, 133.5, 129.2, 128.9, 128.0, 127.6, 127.1, 126.5, 125.9, 119.1, 26.3, 25.8, 17.2; HRMS (ESI):  $m/z$  calcd for  $\text{C}_{14}\text{H}_{13}\text{NSe}$   $[\text{M}+\text{Na}]^+$  298.0110, found 298.0110.

#### 4-(Methylselanyl)butanenitrile (5s)

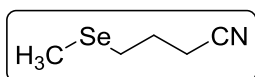

**5s:** (Method A: 41%, 13.4 mg, Method B: 56%, 18.1 mg; light yellow oil; NMR data are in accordance with literature values<sup>[18]</sup>);  $^1\text{H}$  NMR (600 MHz, Chloroform-*d*)  $\delta$  2.66 (t,  $J = 7.0$  Hz, 2H), 2.52 (t,  $J = 7.0$  Hz, 2H), 2.07 – 1.96 (m, 5H);  $^{13}\text{C}$  NMR (151 MHz, Chloroform-*d*)  $\delta$  119.3, 25.7, 23.6, 17.2, 4.4.

#### 4-(Benzylselanyl)butanenitrile (5t)

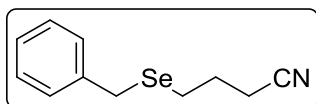

**5t:** (Method A: 58%, 27.7 mg, Method B: 64%, 30.4 mg; yellow oil; NMR data are in accordance with literature values<sup>[19]</sup>);  $^1\text{H}$  NMR (600 MHz, Chloroform-*d*)  $\delta$  7.28 (dt,  $J = 10.6, 7.2$  Hz, 4H), 7.21 (t,  $J = 6.9$  Hz, 1H), 3.77 (s, 2H), 2.57 (t,  $J = 7.0$  Hz, 2H), 2.39 (d,  $J = 14.1$  Hz, 2H), 1.87 (p,  $J = 7.1$  Hz, 2H);  $^{13}\text{C}$  NMR (151 MHz, Chloroform-*d*)  $\delta$  138.9, 128.9, 128.8, 127.1, 119.2, 27.4, 25.9, 22.1, 17.2.

## 2,2,6,6-Tetramethyl-1-((5-phenyl-3,4-dihydro-2H-pyrrol-2-yl)methoxy)piperidine

(6)

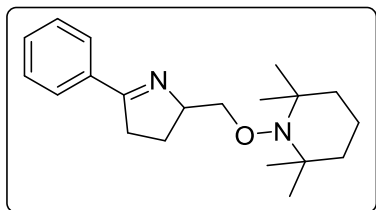

**6:** (71%, 44.6 mg, yellow oil; NMR data are in accordance with literature values<sup>[3]</sup>); **<sup>1</sup>H NMR** (400 MHz, Chloroform-*d*)  $\delta$  7.88 – 7.81 (m, 2H), 7.46 – 7.33 (m, 3H), 4.44 (d,  $J = 13.9$  Hz, 1H), 4.08 (d,  $J = 12.9$  Hz, 1H), 3.96 (d,  $J = 13.9$  Hz, 1H), 3.12 – 2.84 (m, 2H), 2.18 – 1.99 (m, 2H), 1.59 – 1.32 (m, 6H), 1.21 (s, 3H), 1.15 (s, 3H), 1.10 (s, 3H), 0.94 (s, 3H). **<sup>13</sup>C NMR** (101 MHz, Chloroform-*d*)  $\delta$  173.5, 134.9, 130.4, 128.5, 127.8, 79.2, 72.5, 60.0, 39.7, 35.5, 33.3, 33.1, 26.0, 20.4, 20.1, 17.2.

## 4-((2,2,6,6-tetramethylpiperidin-1-yl)oxy)butanenitrile (7)

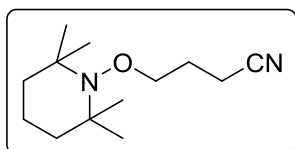

**7:** (61%; yield was determined by <sup>1</sup>H NMR analysis of the crude reaction mixture using 1,3,5-trimethoxybenzene as an internal standard) **<sup>1</sup>H NMR** (400 MHz, Chloroform-*d*)  $\delta$  3.82 (t,  $J = 5.8$  Hz, 2H), 2.47 (t,  $J = 7.2$  Hz, 2H), 1.87 (p,  $J = 6.6$  Hz, 2H), 1.42 (d,  $J = 4.8$  Hz, 4H), 1.36 (s, 2H), 1.10 (d,  $J = 23.8$  Hz, 12H); **HRMS** (ESI):  $m/z$  calcd for C<sub>14</sub>H<sub>13</sub>NSe [M+H]<sup>+</sup> 225.1966, found 225.1958.

## 5. References

- [1]. Cai, S.-H.; Xie, J.-H.; Song, S.; Ye, L.; Feng, C.; Loh, T.-P. *ACS Catal.* **2016**, *6* (8), 5571-5574.
- [2]. Zhang, X.; Qi, D.; Jiao, C.; Zhang, Z.; Liu, X.; Zhang, G. *Org. Chem. Front.* **2021**, *8* (23), 6522-6529.
- [3]. Yang, H.-B.; Pathipati, S. R.; Selander, N. *ACS Catal.* **2017**, *7* (12), 8441-8445.
- [4]. Guven, S.; Kundu, G.; Weßels, A.; Ward, J. S.; Rissanen, K.; Schoenebeck, F. *J. Am. Chem. Soc.* **2021**, *143* (22), 8375-8380.
- [5]. Zhang, M.; Liu, S.; Li, H.; Guo, Y.; Li, N.; Guan, M.; Mehfooz, H.; Zhao, J.; Zhang, Q. *Chemistry* **2019**, *25* (54), 12620-12627.
- [6]. Usami, K.; Yamaguchi, E.; Tada, N.; Itoh, A. *Org. Lett.* **2018**, *20* (18), 5714-5717.
- [7]. Zhao, B.; Kong, X.; Xu, B. *Tetrahedron Lett.* **2019**, *60* (31), 2063-2066.
- [8]. Yang, D.; Huang, H.; Li, M. H.; Si, X. J.; Zhang, H.; Niu, J. L.; Song, M. P. *Org. Lett.* **2020**, *22* (11), 4333-4338.
- [9]. Tian, L.; Gao, S.; Wang, R.; Li, Y.; Tang, C.; Shi, L.; Fu, J. *Chem. Commun (Camb)*. **2019**, *55* (37), 5347-5350.
- [10]. Gu, Y. R.; Duan, X. H.; Yang, L.; Guo, L. N. *Org. Lett.* **2017**, *19* (21), 5908-5911.
- [11]. Zheng, M.; Li, G.; Lu, H. *Org. Lett.* **2019**, *21* (4), 1216-1220.
- [12]. Tang, Y. Q.; Yang, J. C.; Wang, L.; Fan, M.; Guo, L. N. *Org. Lett.* **2019**, *21* (13), 5178-5182.
- [13]. Singh, D.; Deobald, A. M.; Camargo, L. R. S.; Tabarelli, G.; Rodrigues, O. E. D.; Braga, A. L. *Org. Lett.* **2010**, *12* (15), 3288-3291.
- [14]. Liu, M.; Yang, Y.; Zhao, S.; Leng, T.; Huang, X.; Gao, W.; Wu, H. CN2018-10082883, 108047107, 20180129, 2018.
- [15]. Davies, J.; Sheikh, N. S.; Leonori, D. *Angew. Chem. Int. Ed. Engl.* **2017**, *56* (43), 13361-13365.
- [16]. Anand, D.; He, Y.; Li, L.; Zhou, L. *Org. Biomol. Chem.* **2019**, *17* (3), 533-540.
- [17]. Ji, L.; Qiao, J.; Liu, J.; Tian, M.; Lu, K.; Zhao, X. *Tetrahedron Lett.* **2021**, *75*.
- [18]. Matich, A. J.; McKenzie, M. J.; Lill, R. E.; Brummell, D. A.; McGhie, T. K.; Chen, R. K. Y.; Rowan, D. D. *Phytochemistry (Elsevier)* **2012**, *75*, 140-152.
- [19]. Li, J.; Wang, S. Y.; Ji, S. J. *J. Org. Chem.* **2019**, *84* (24), 16147-16156.

## 6. $^1\text{H}$ , $^{13}\text{C}$ , and $^{19}\text{F}$ NMR Spectra

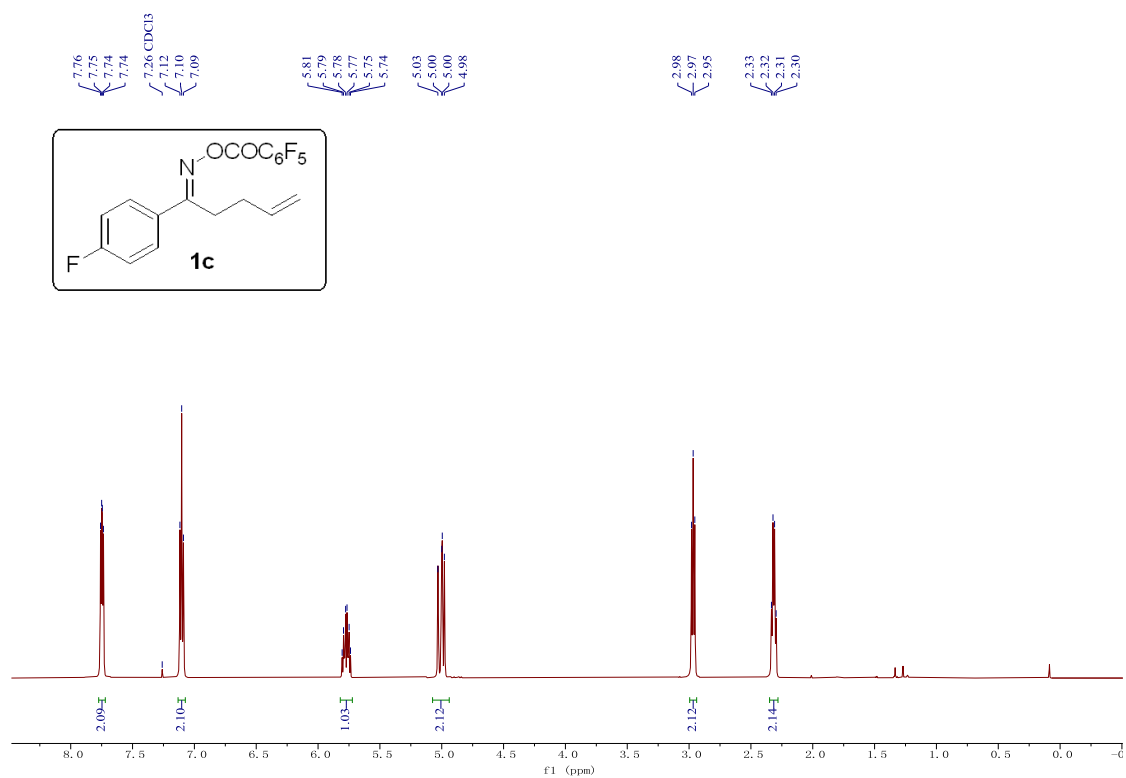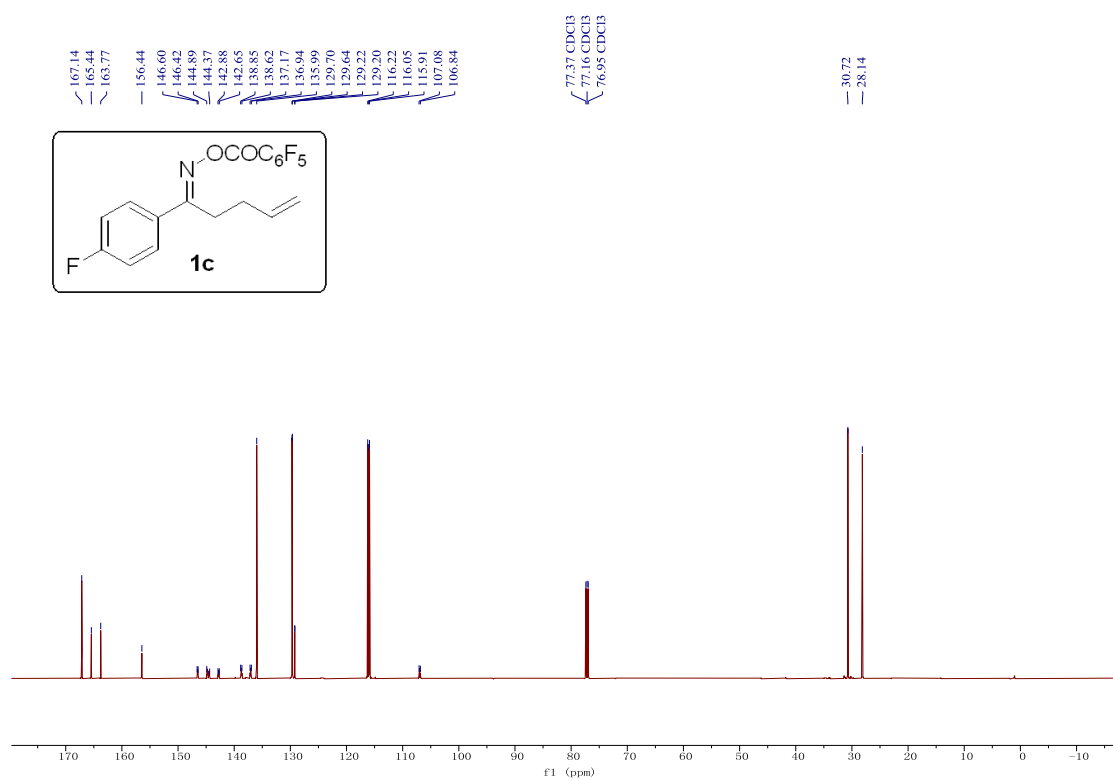

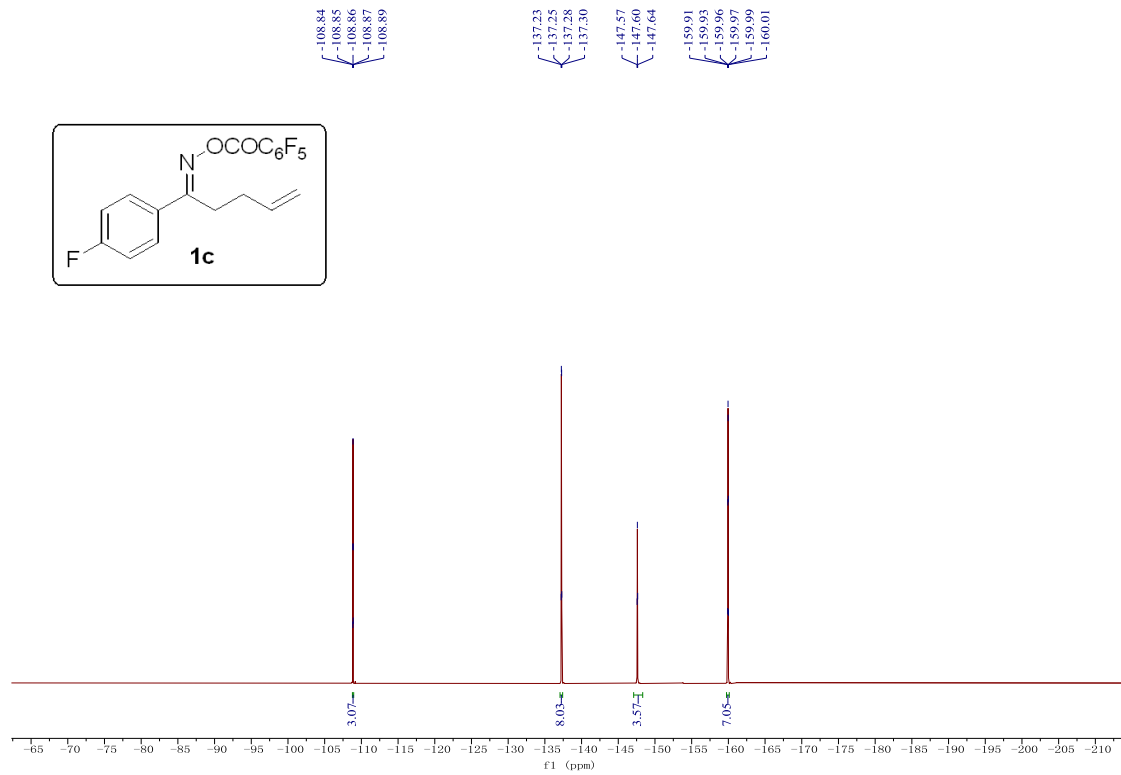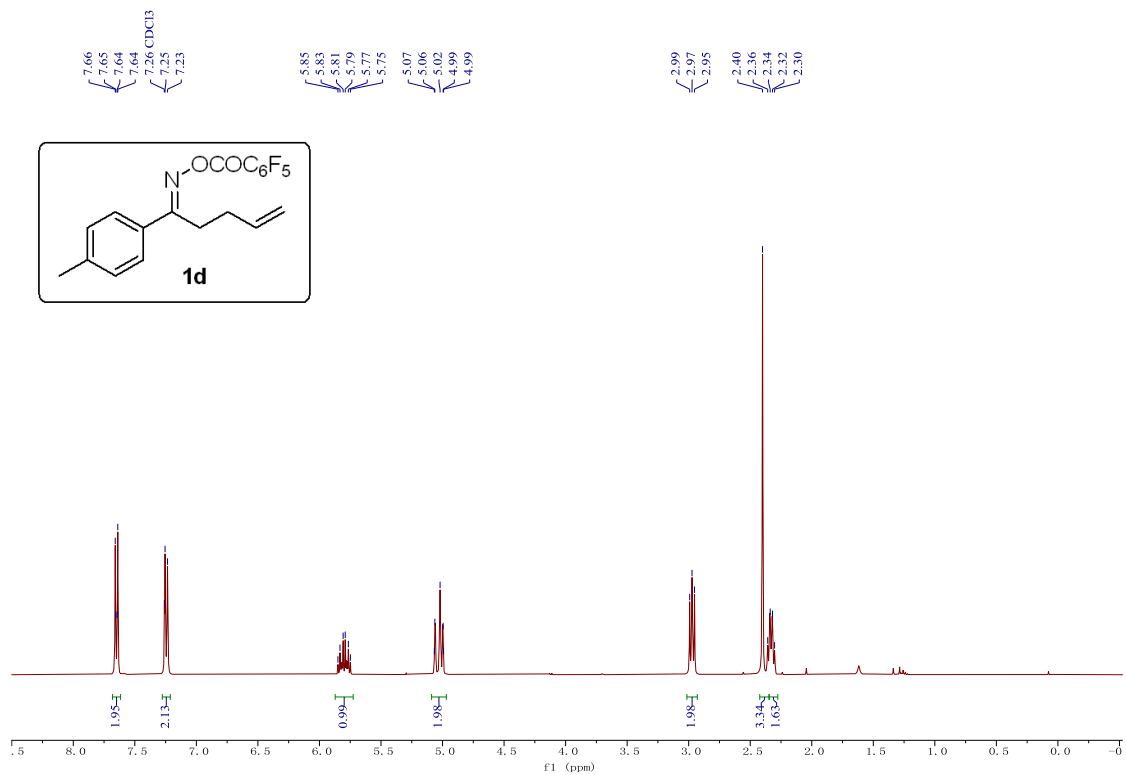

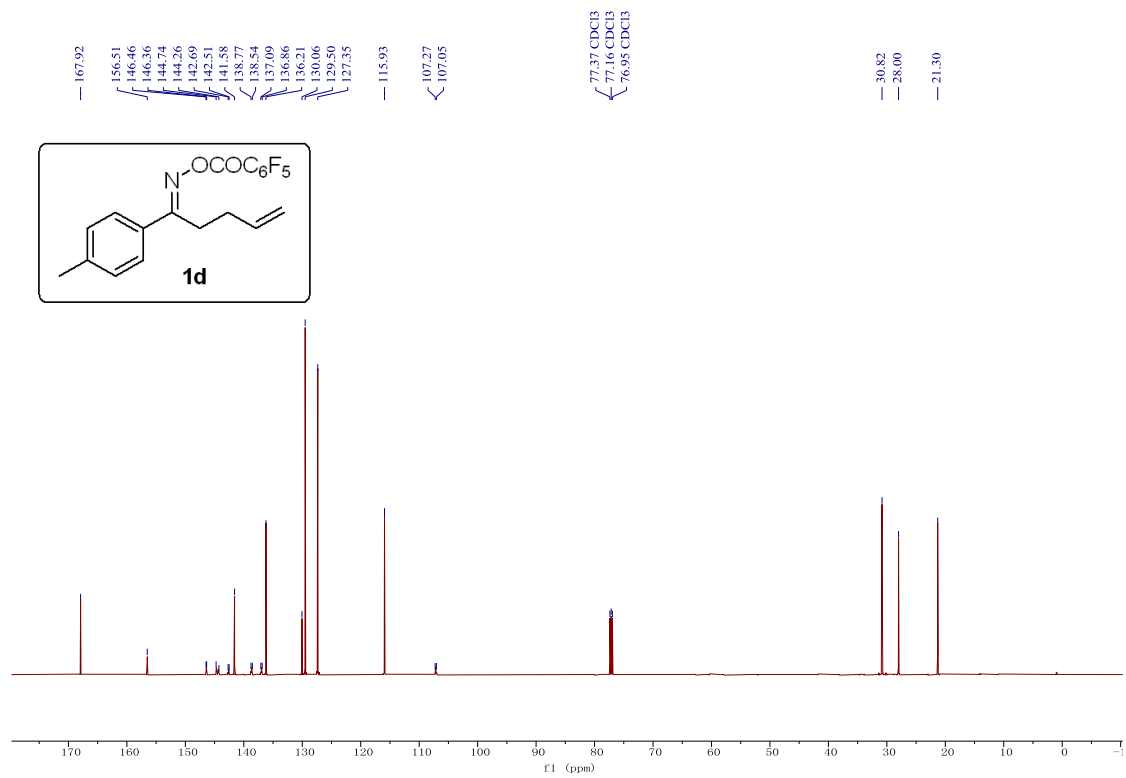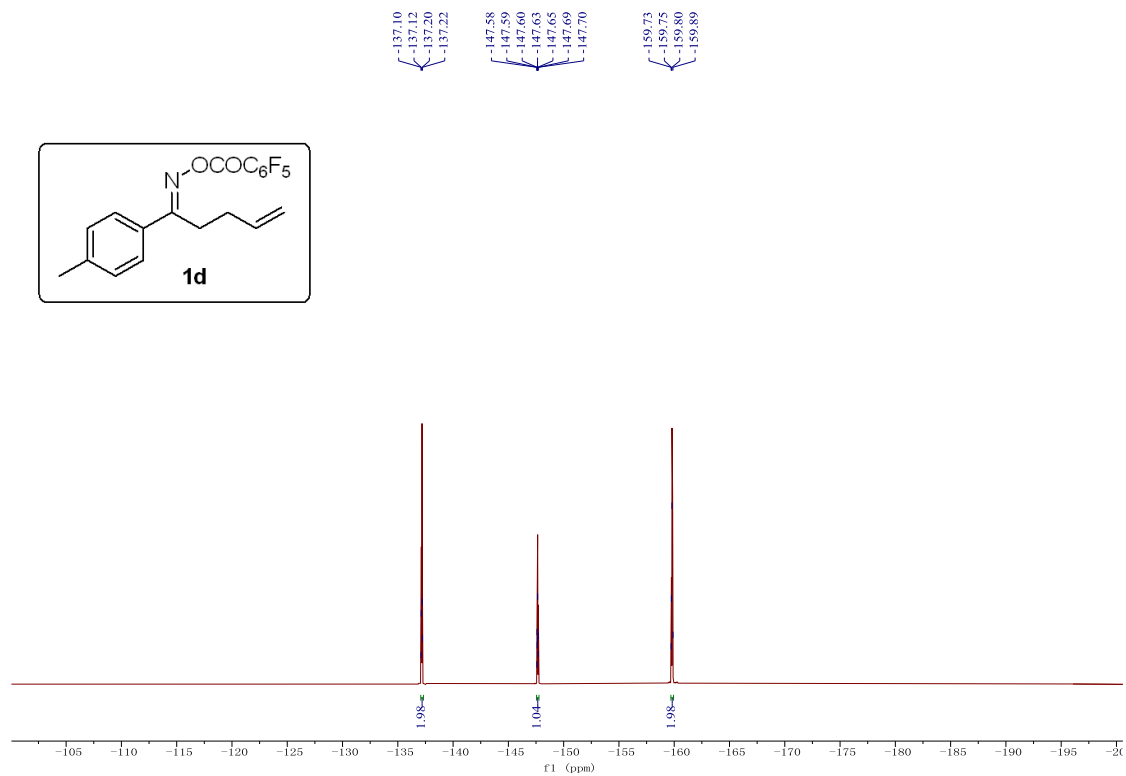

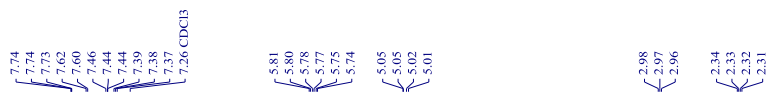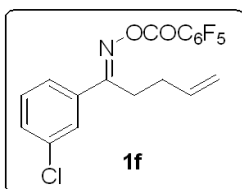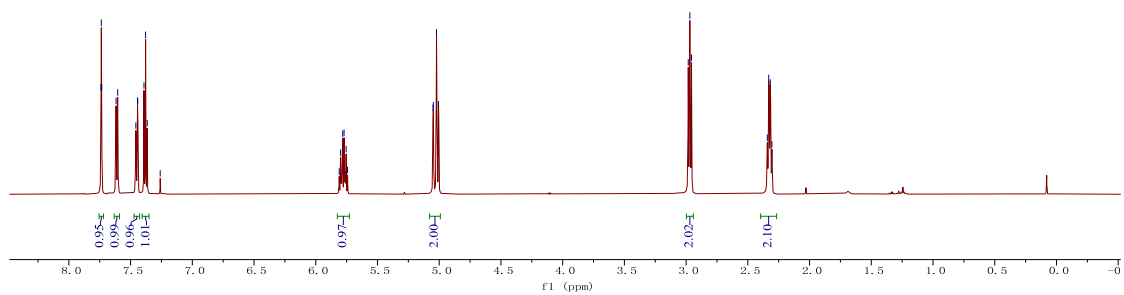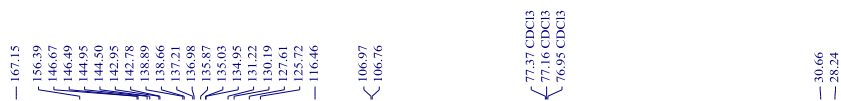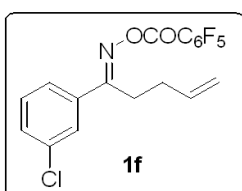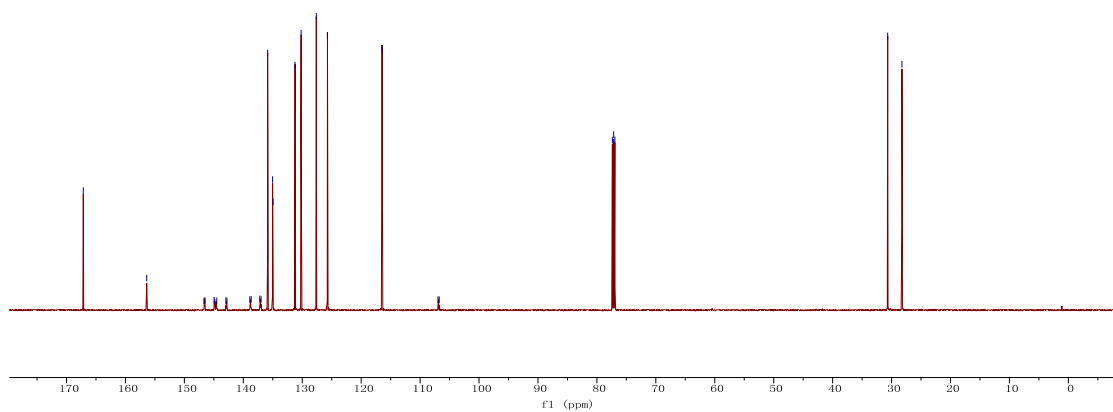

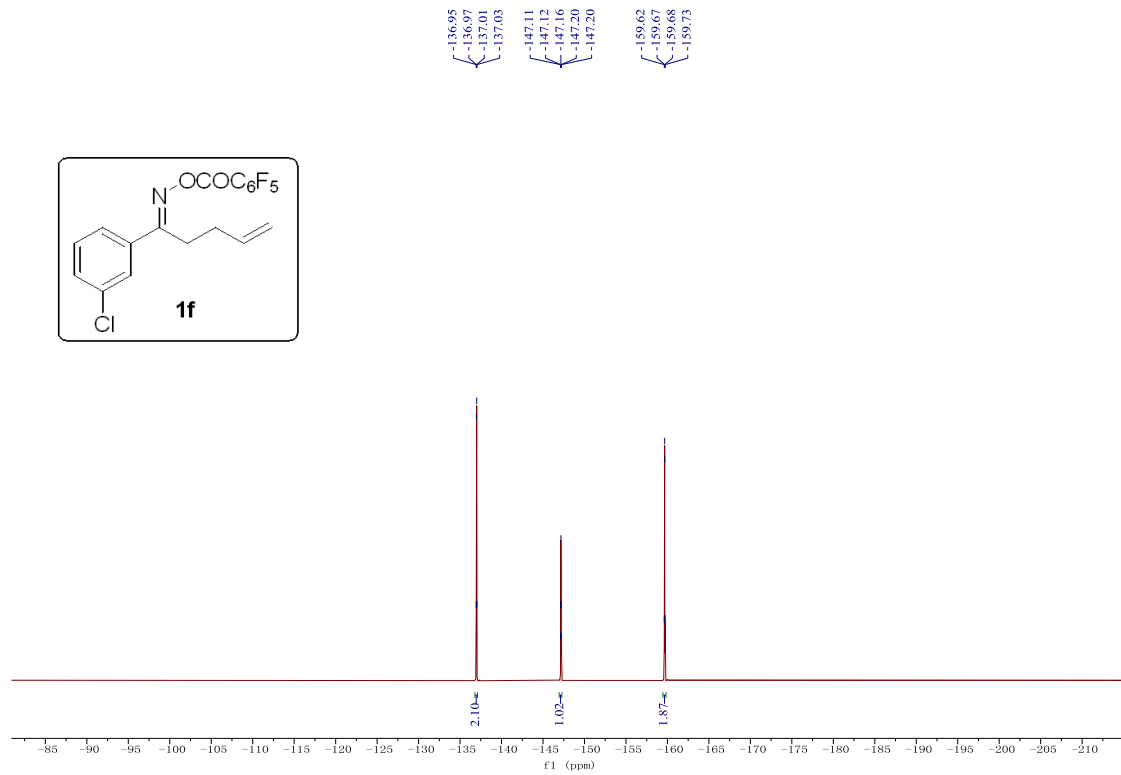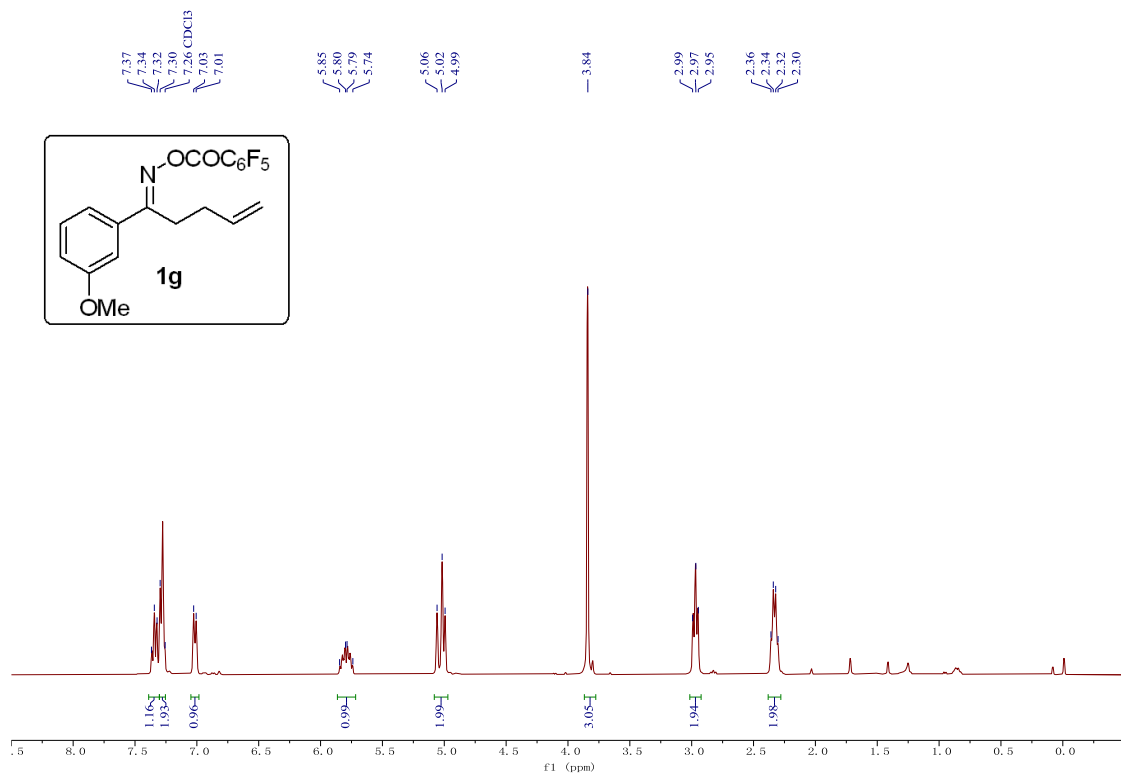



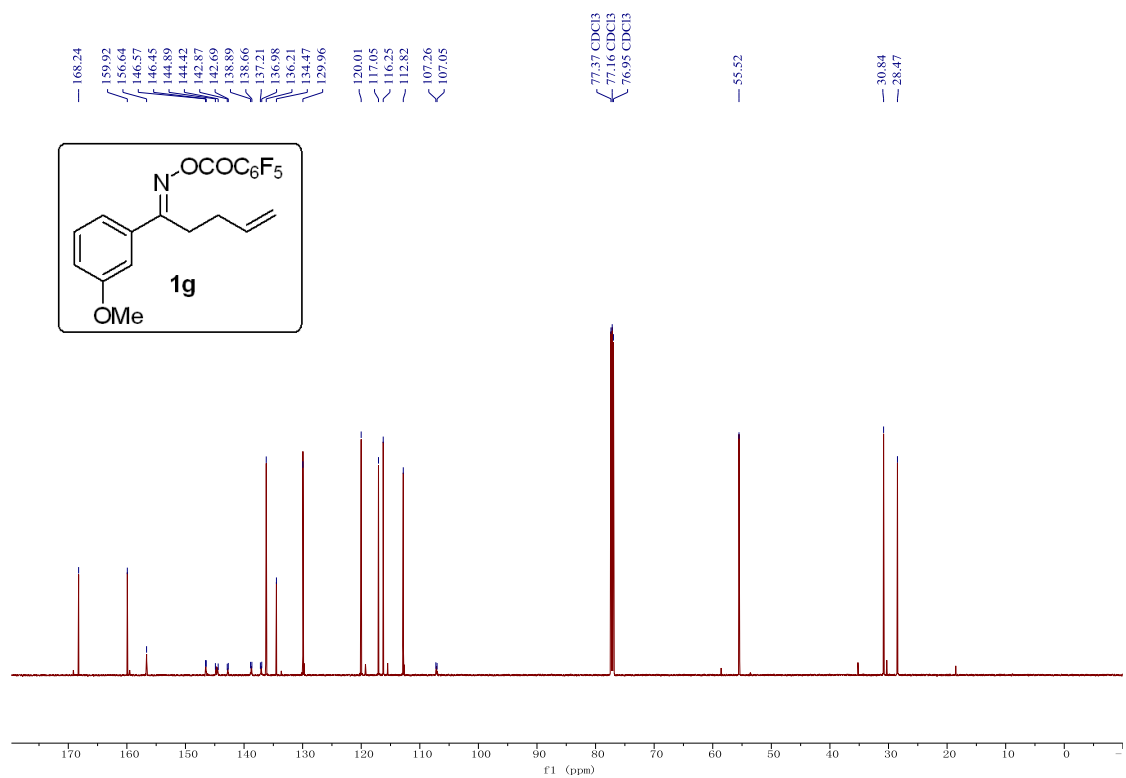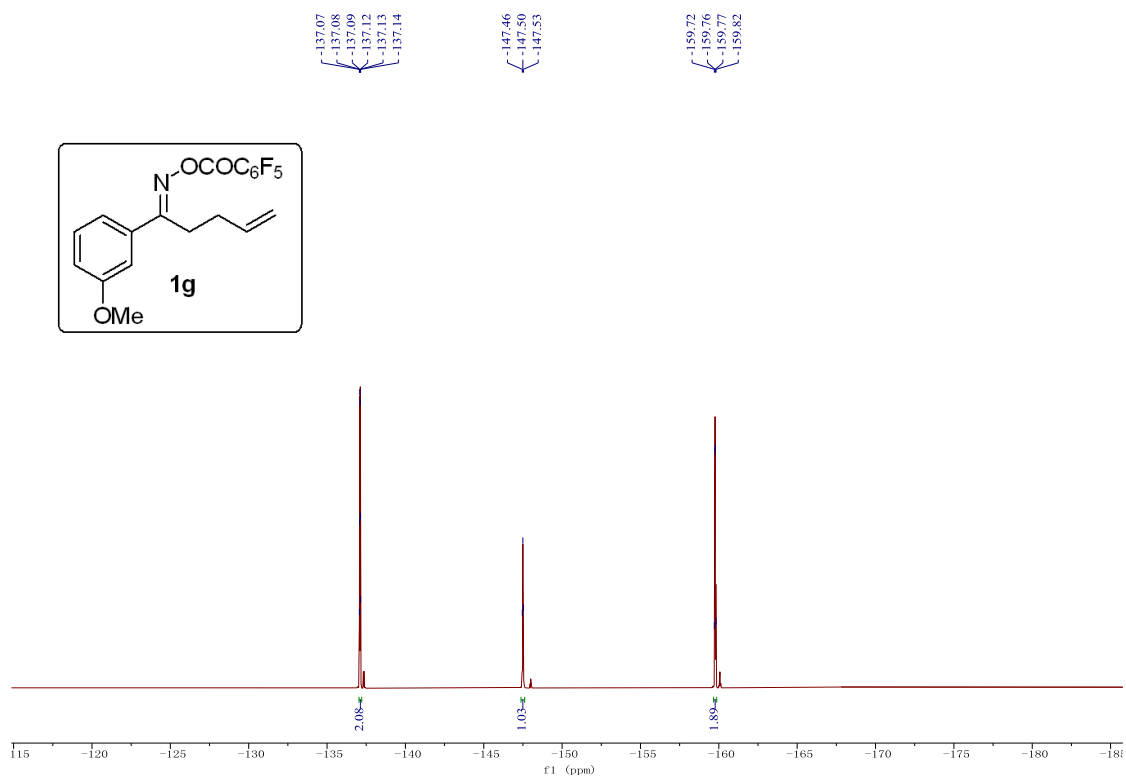

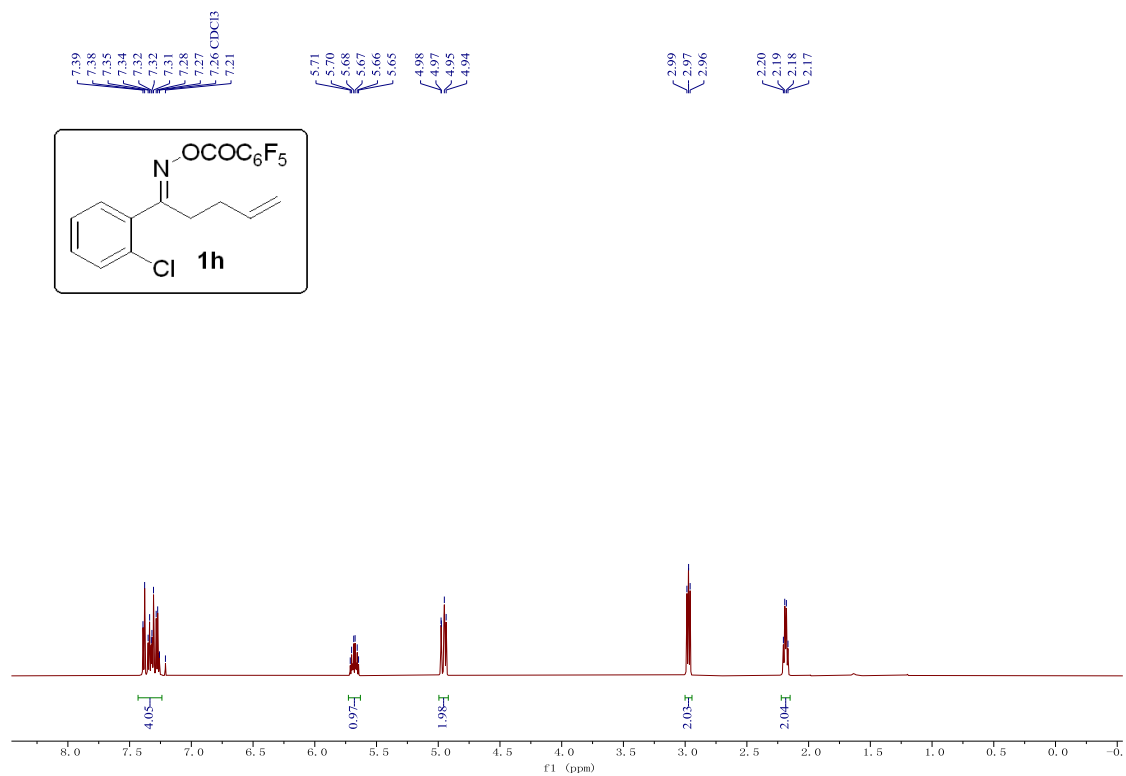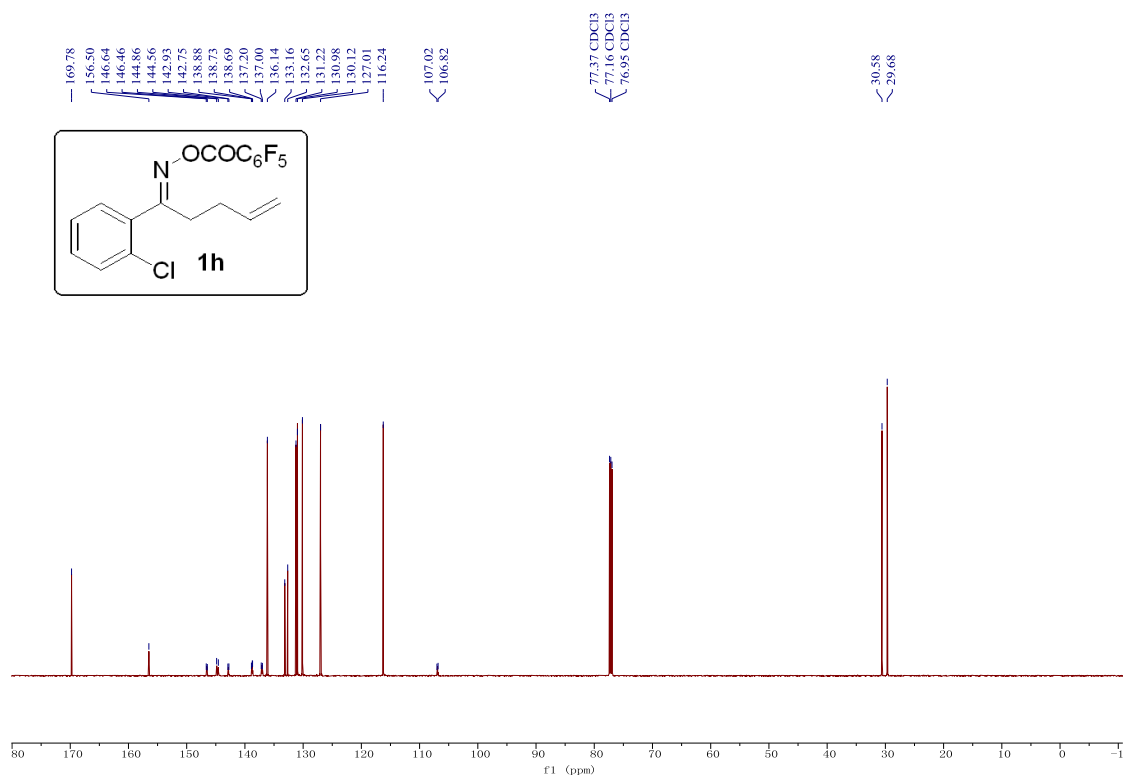

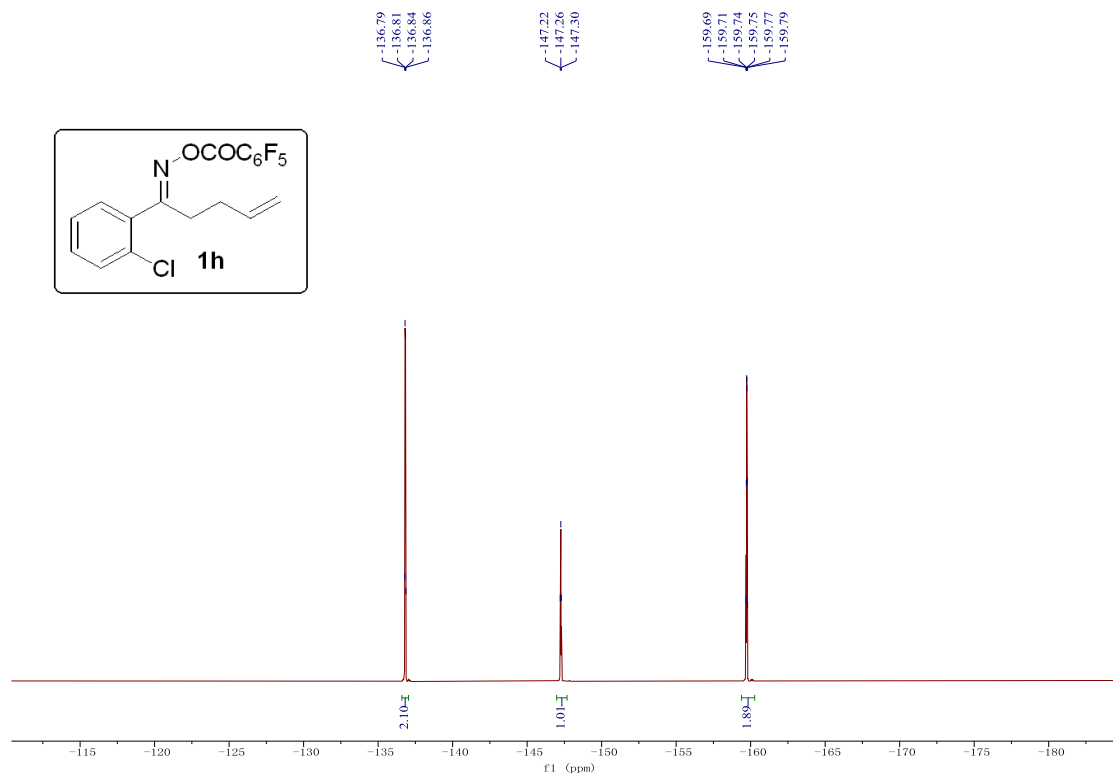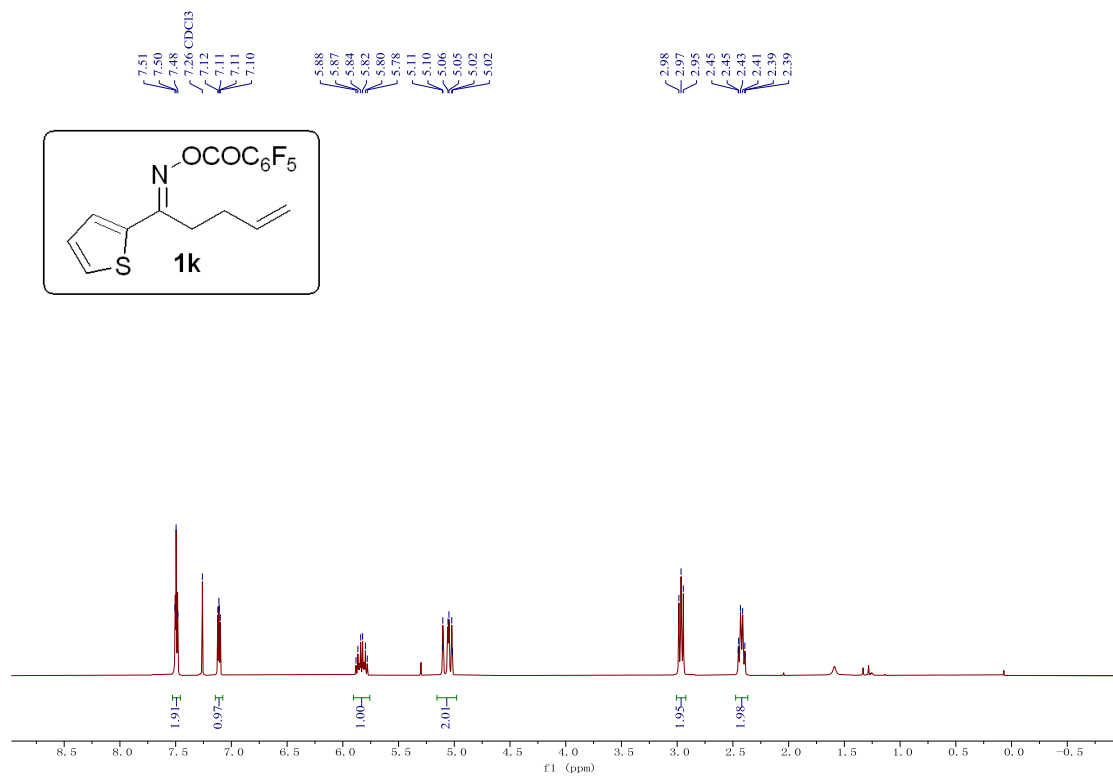

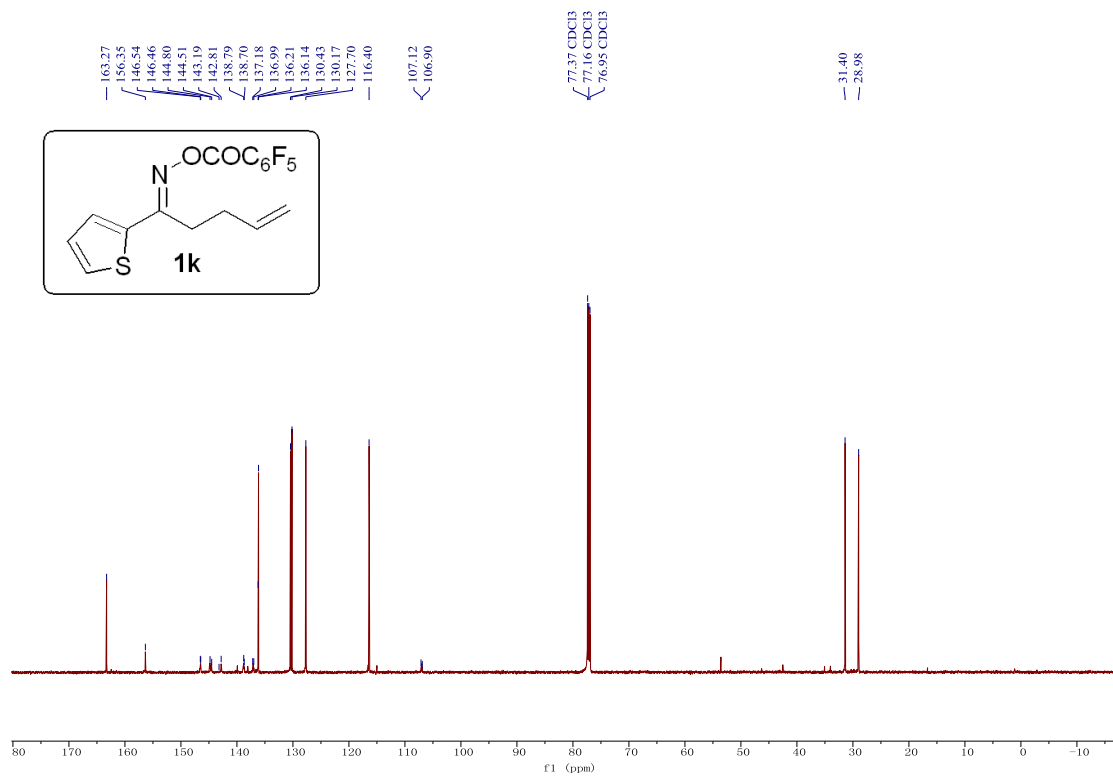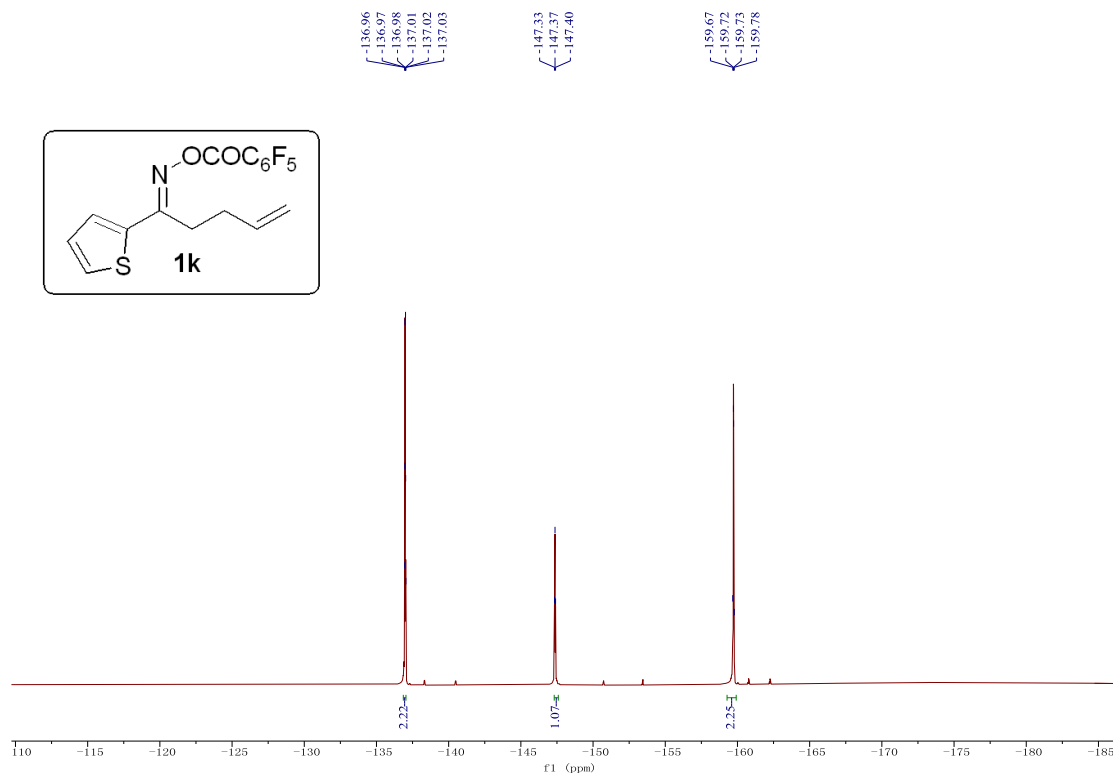

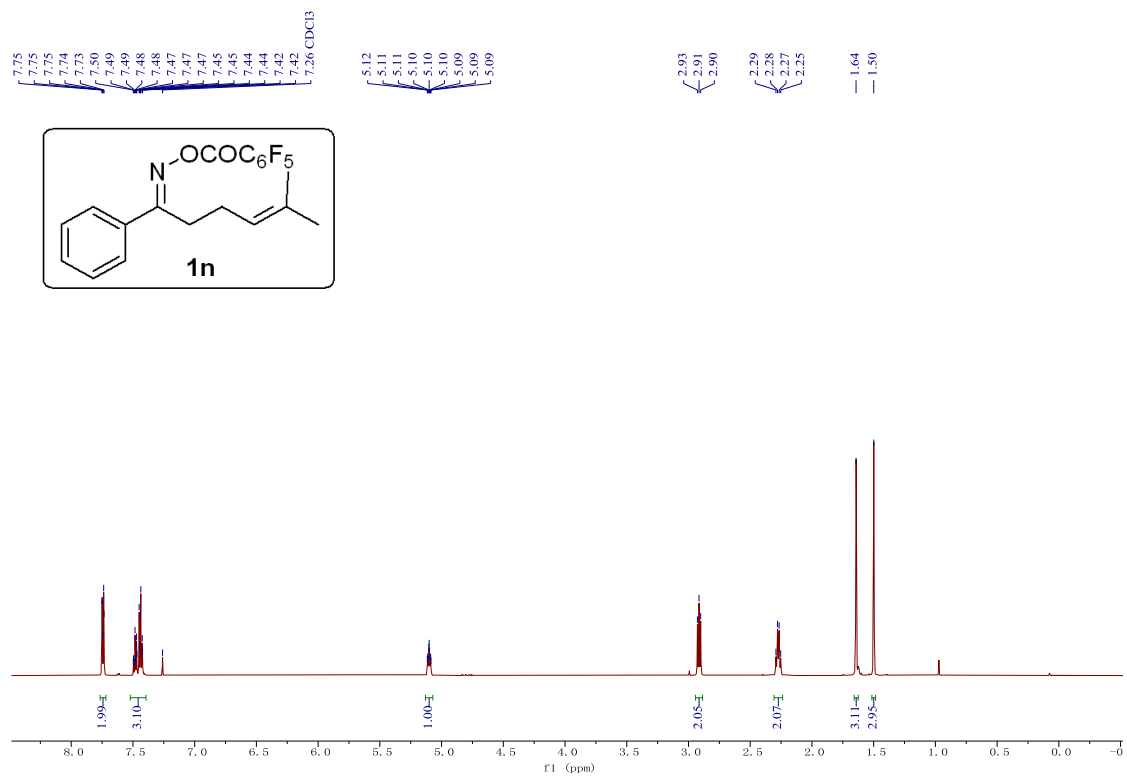

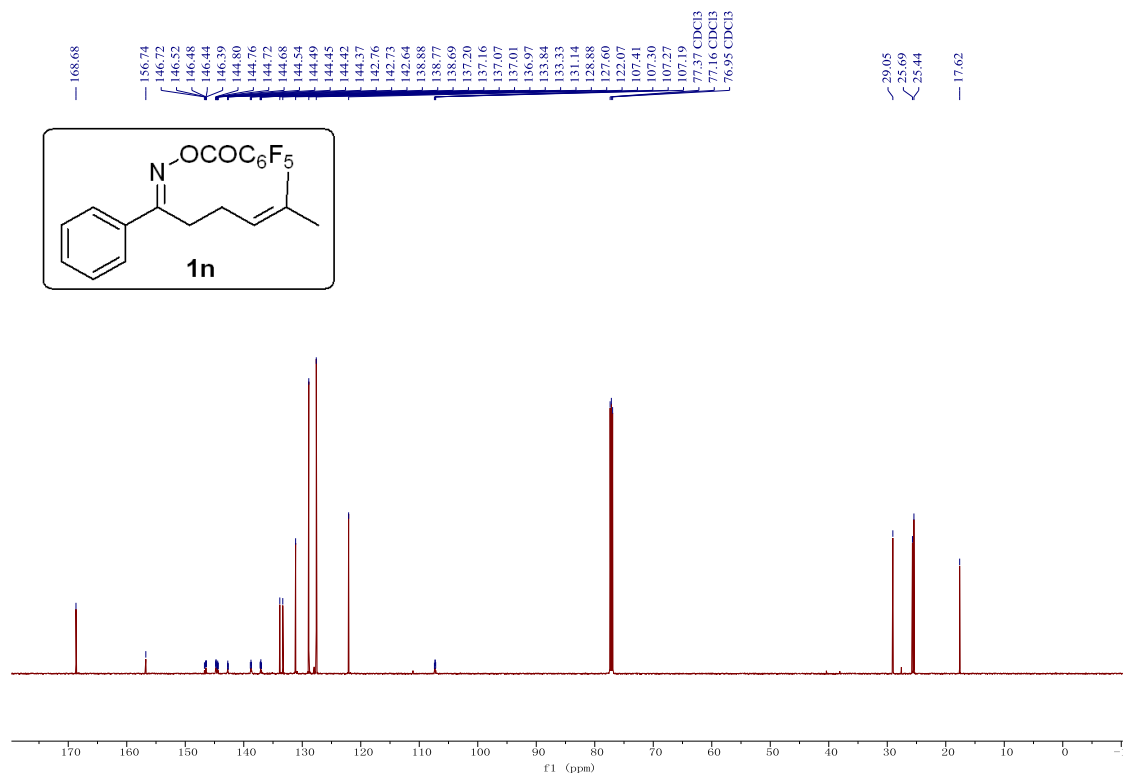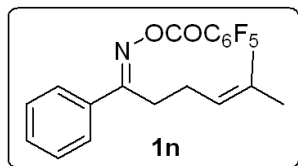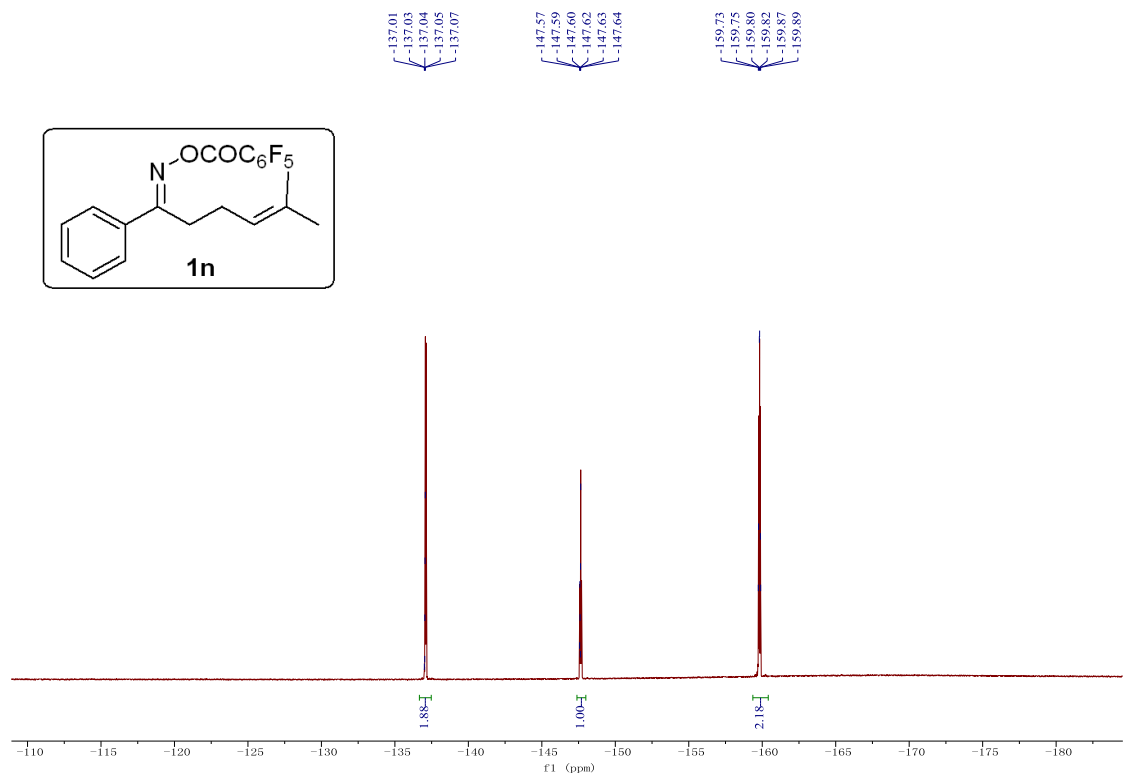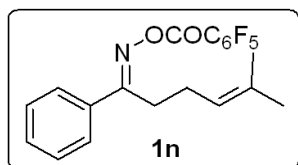

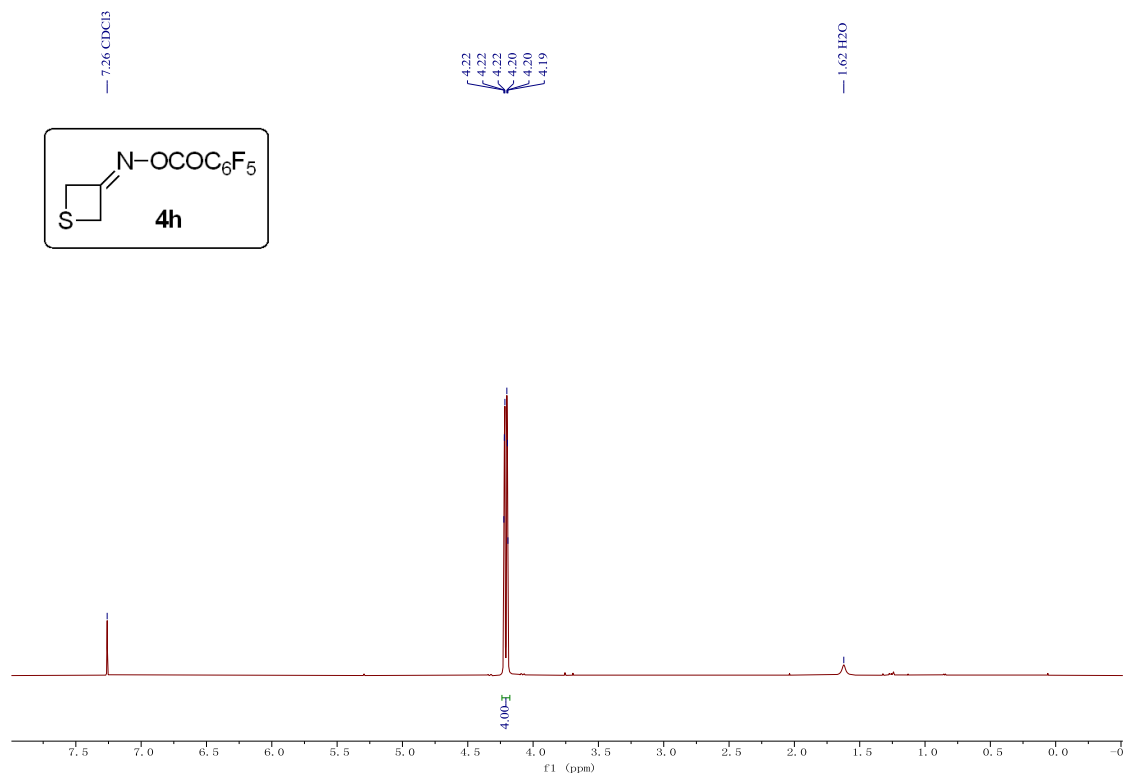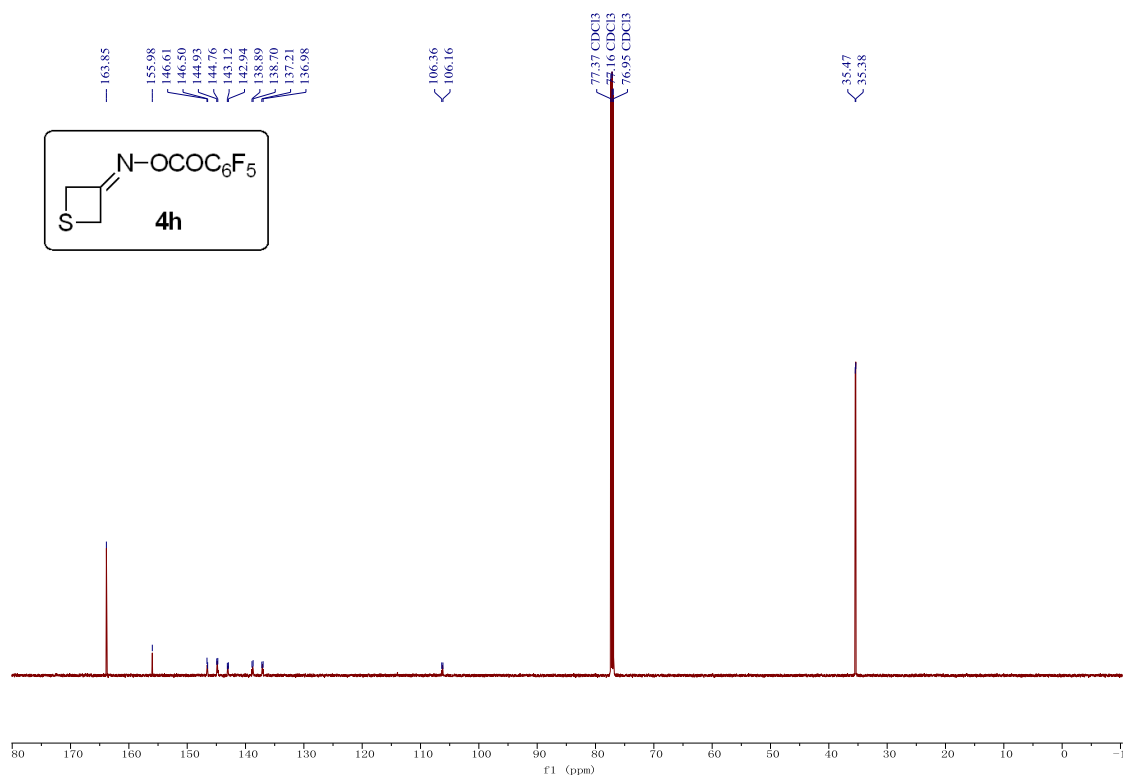

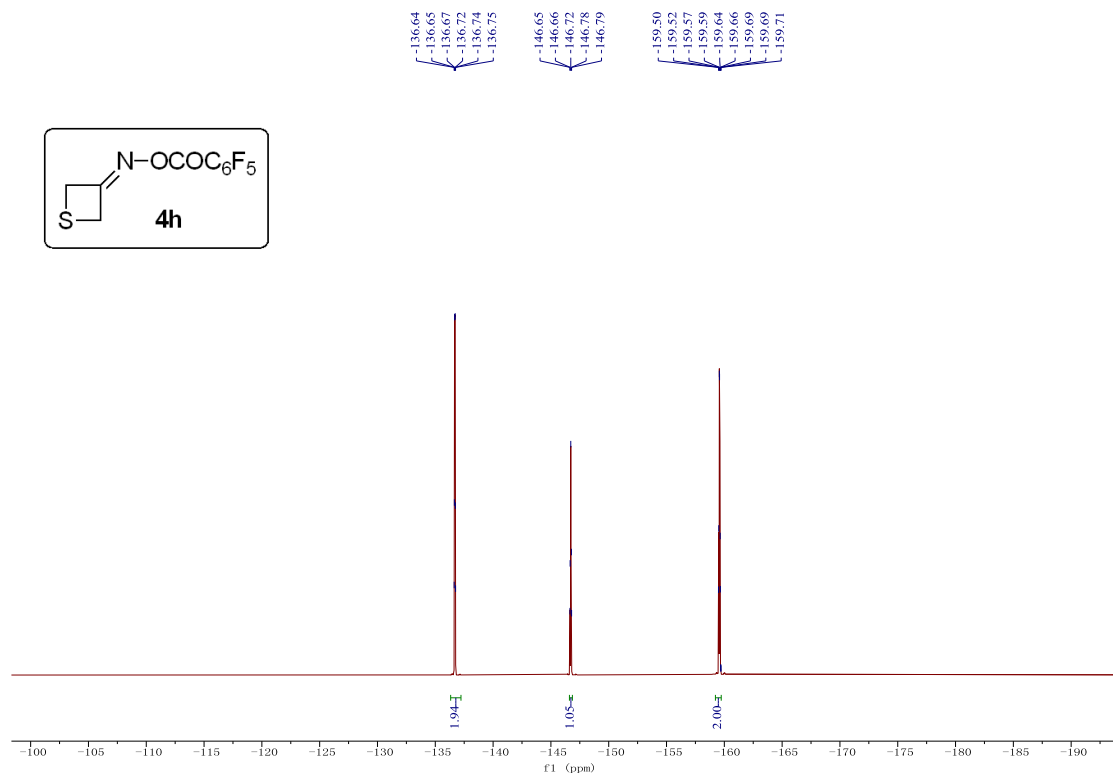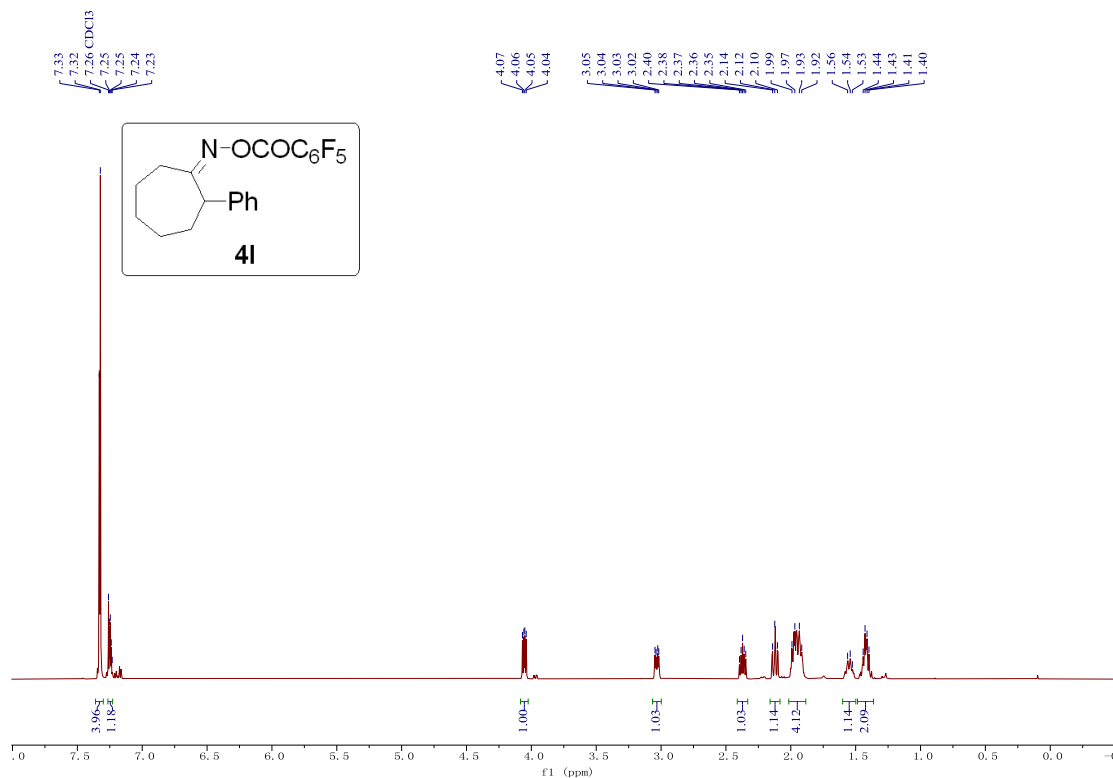



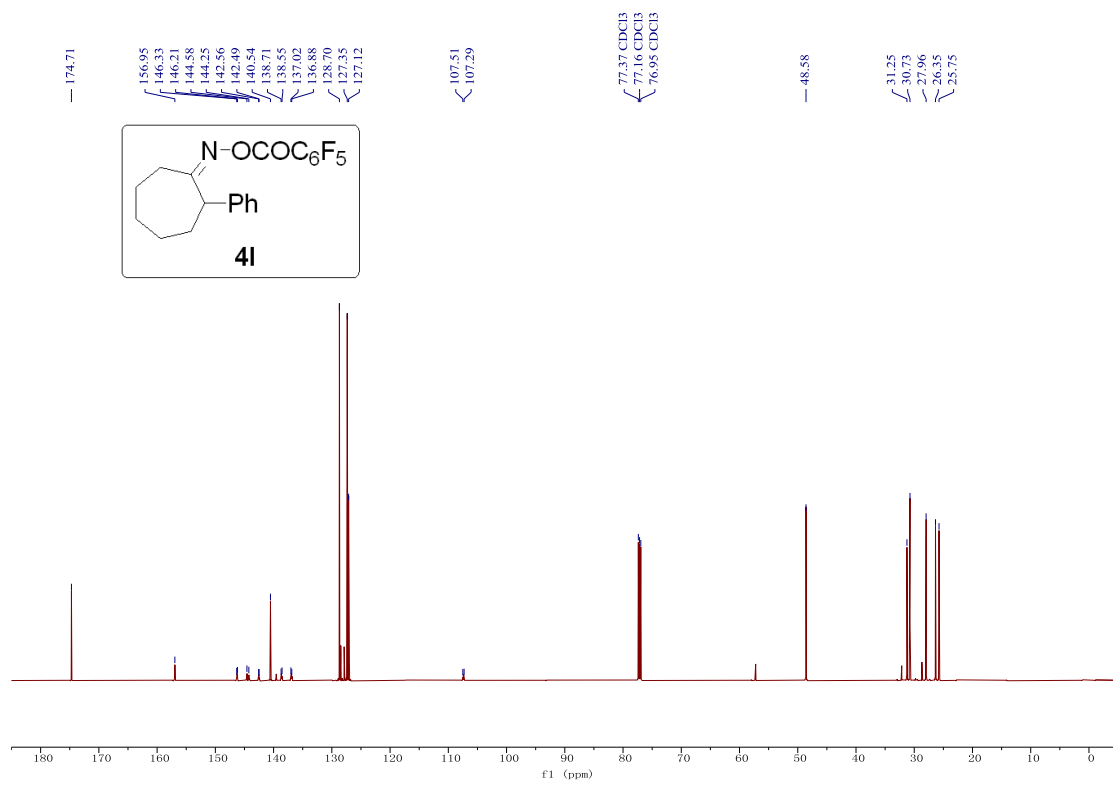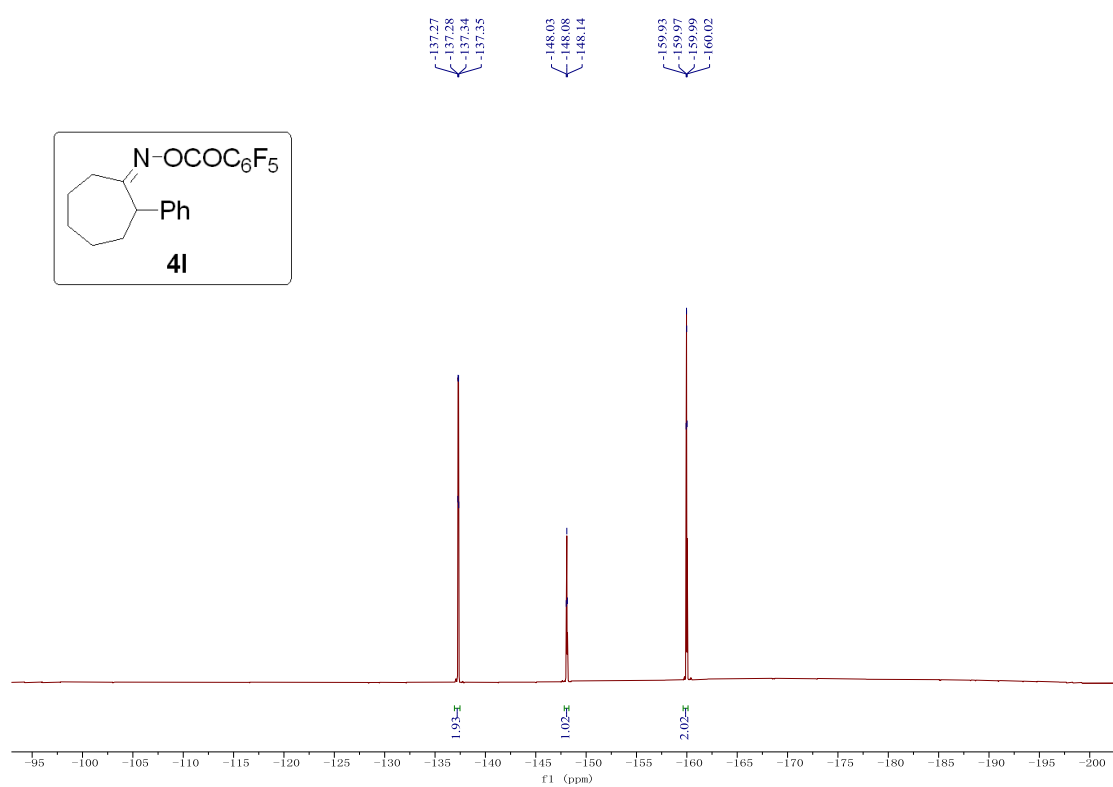

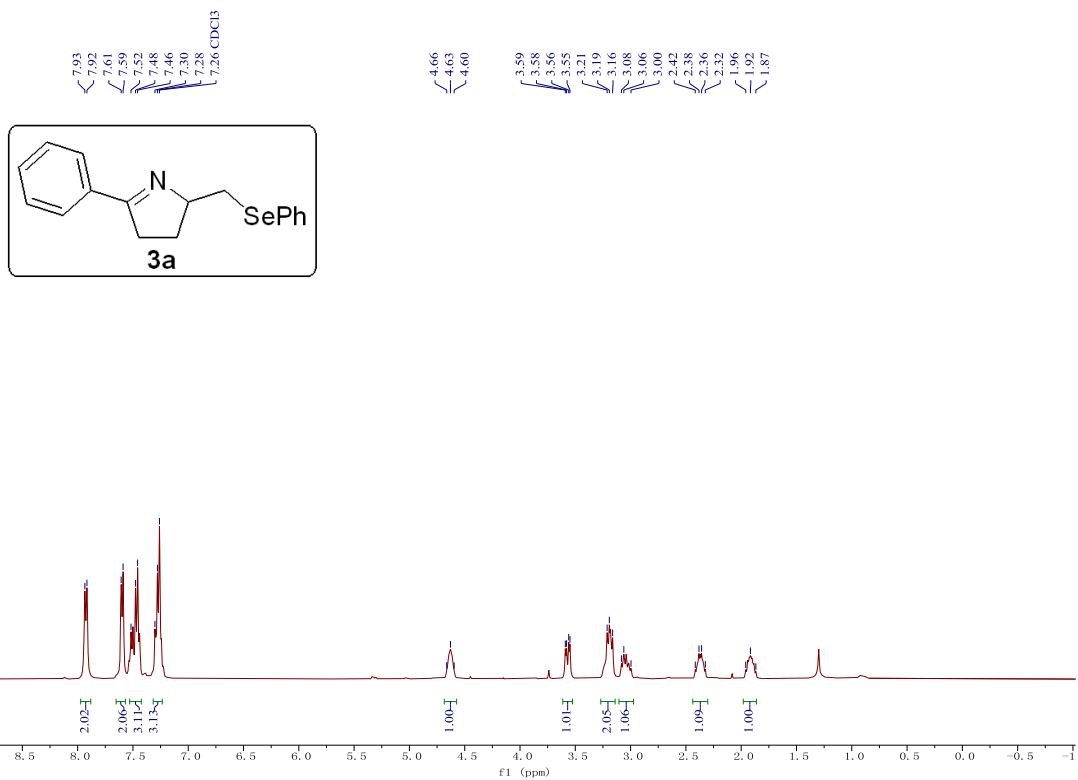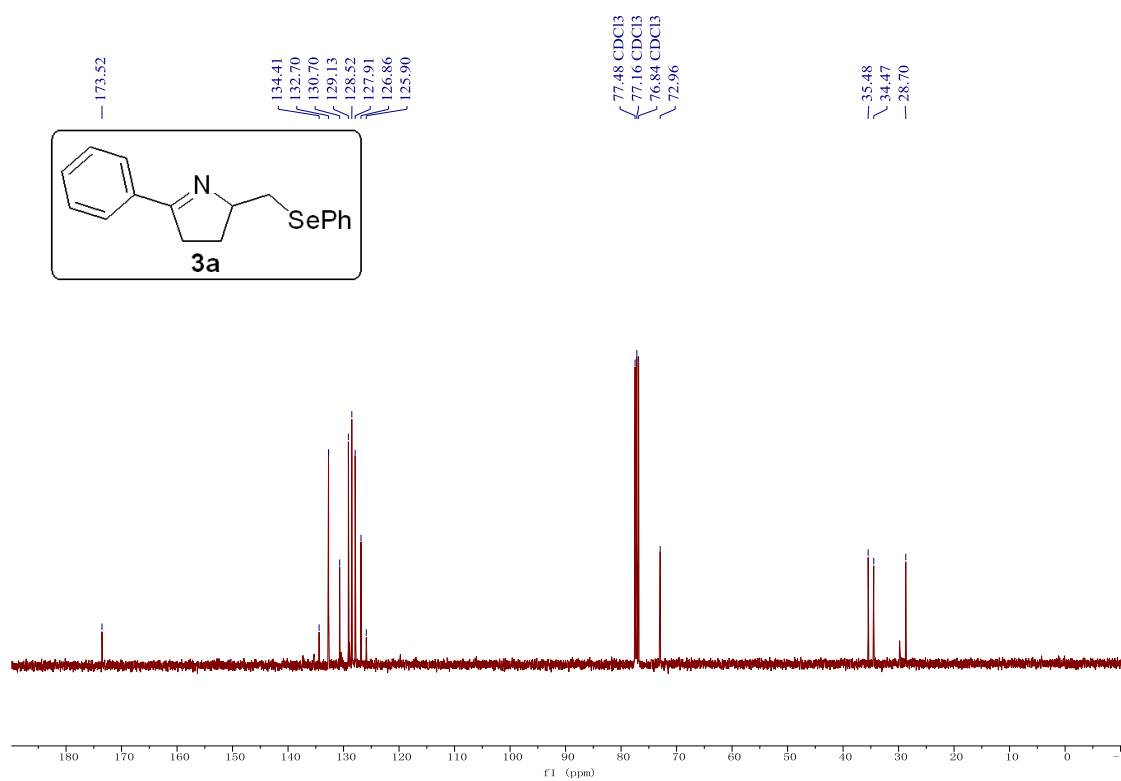

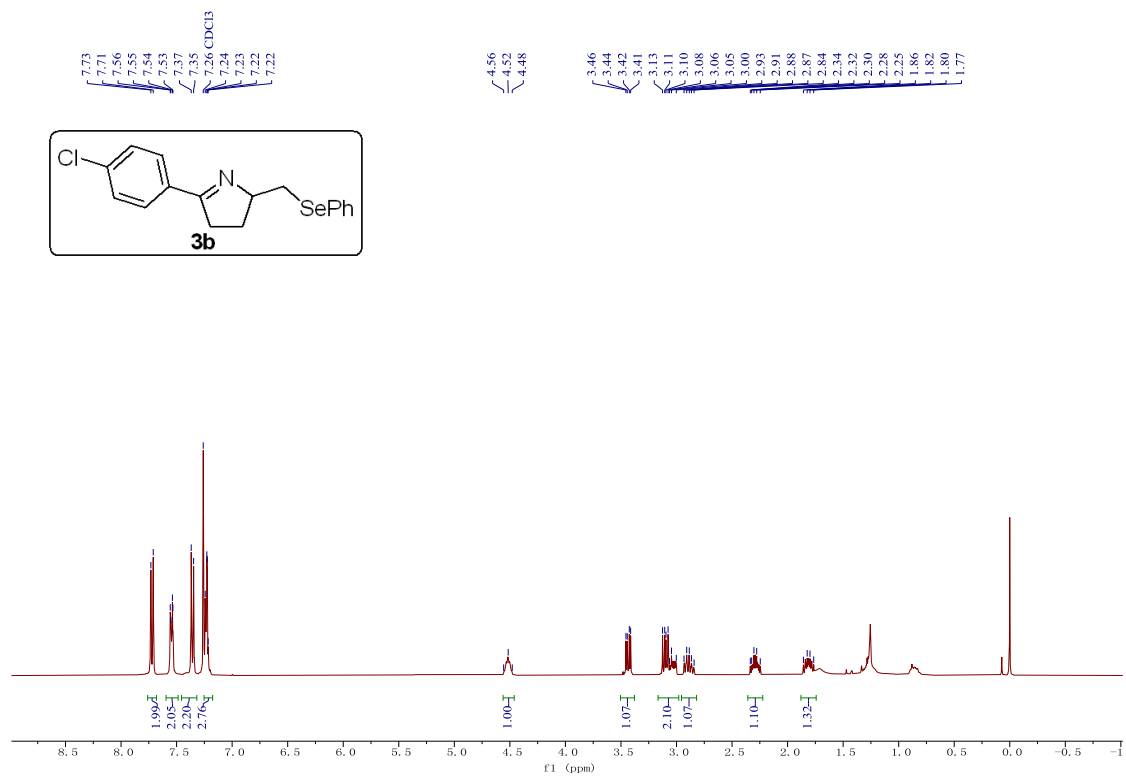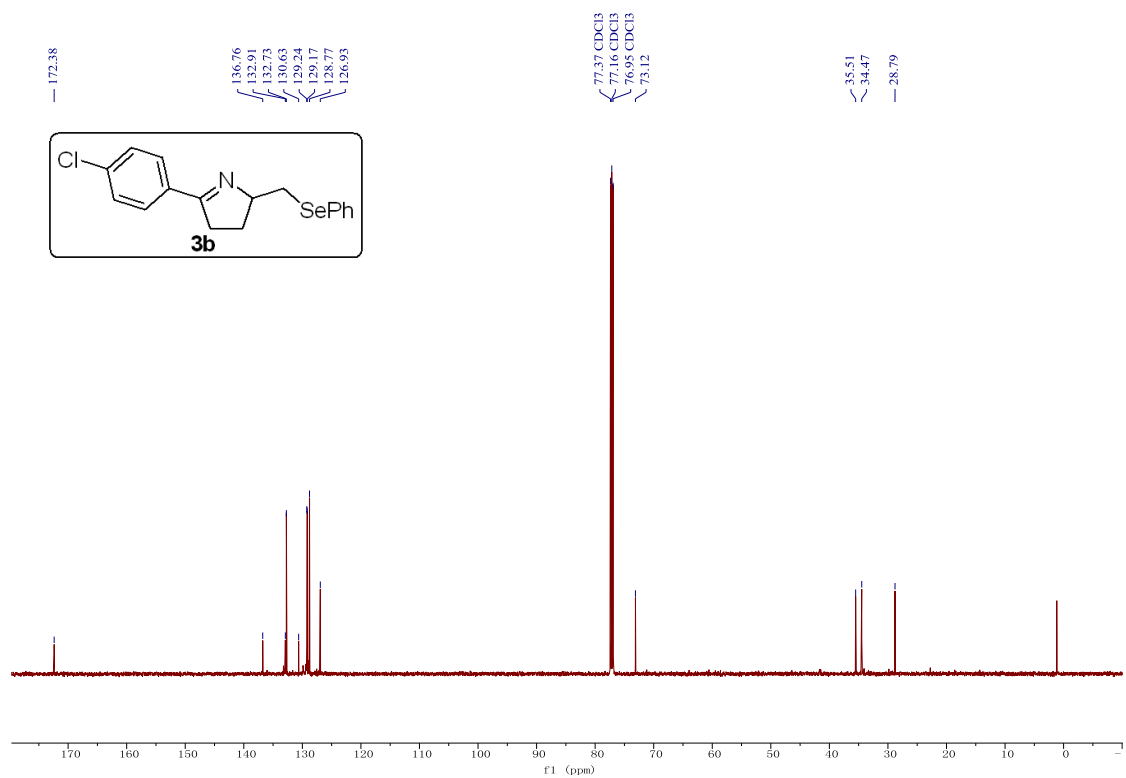

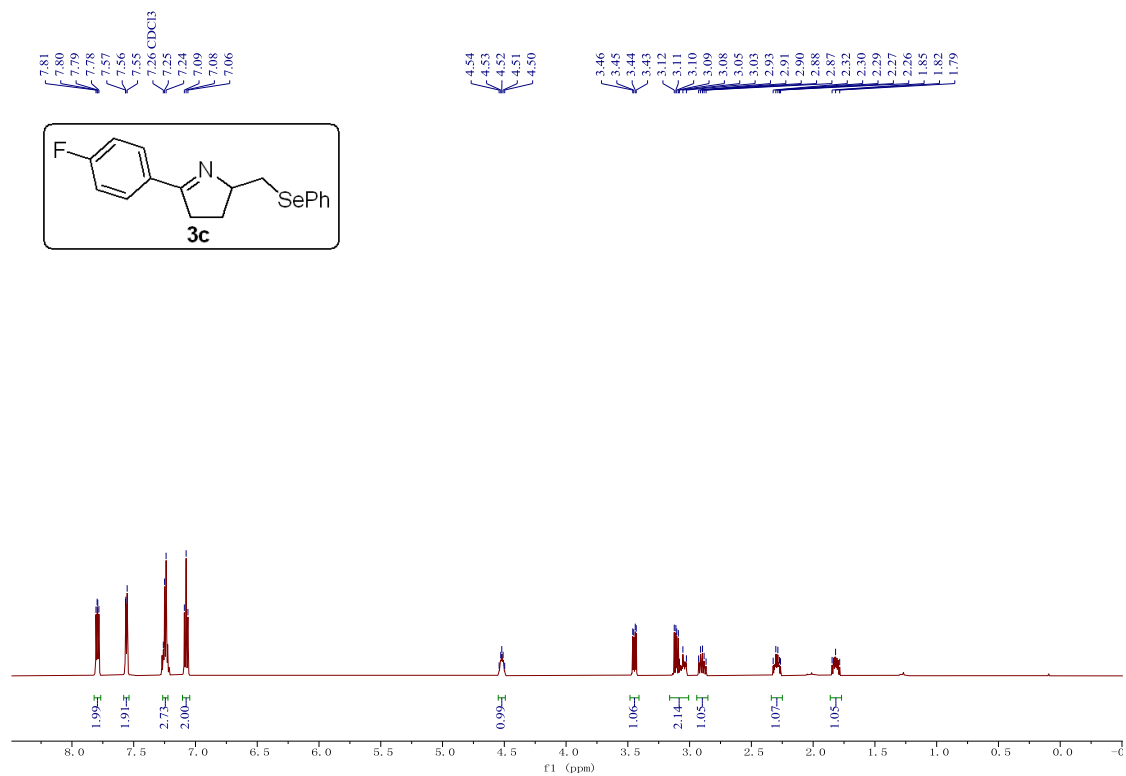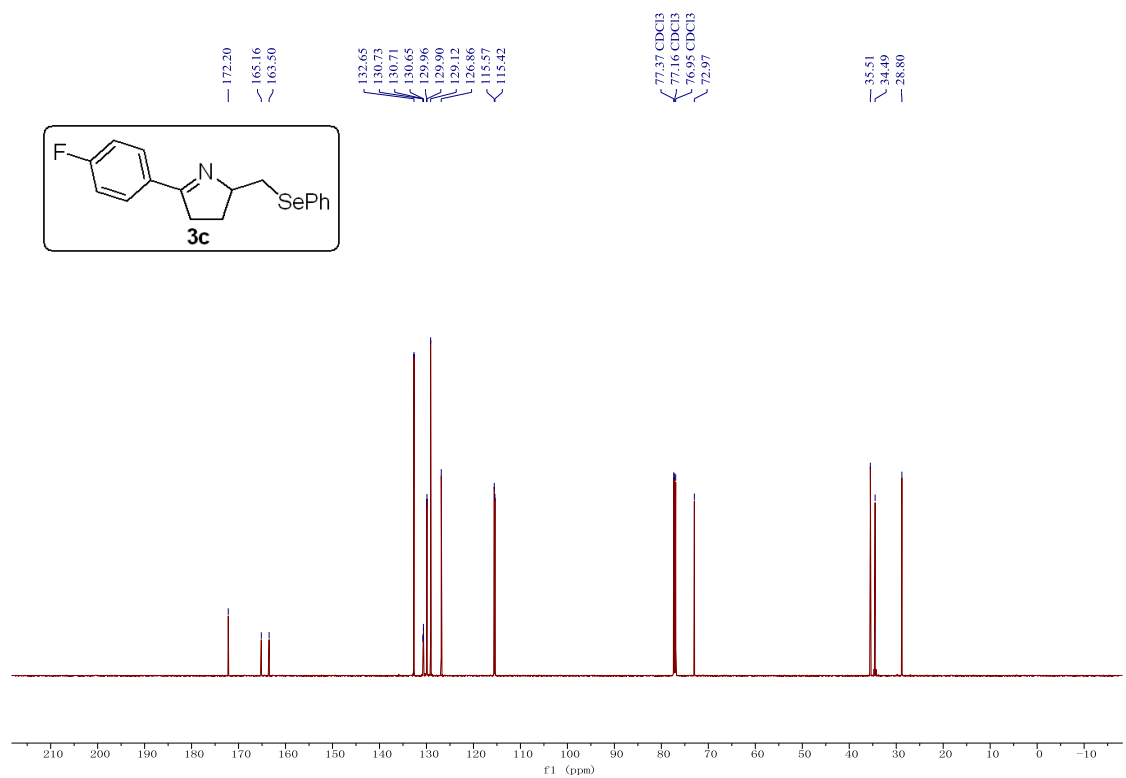

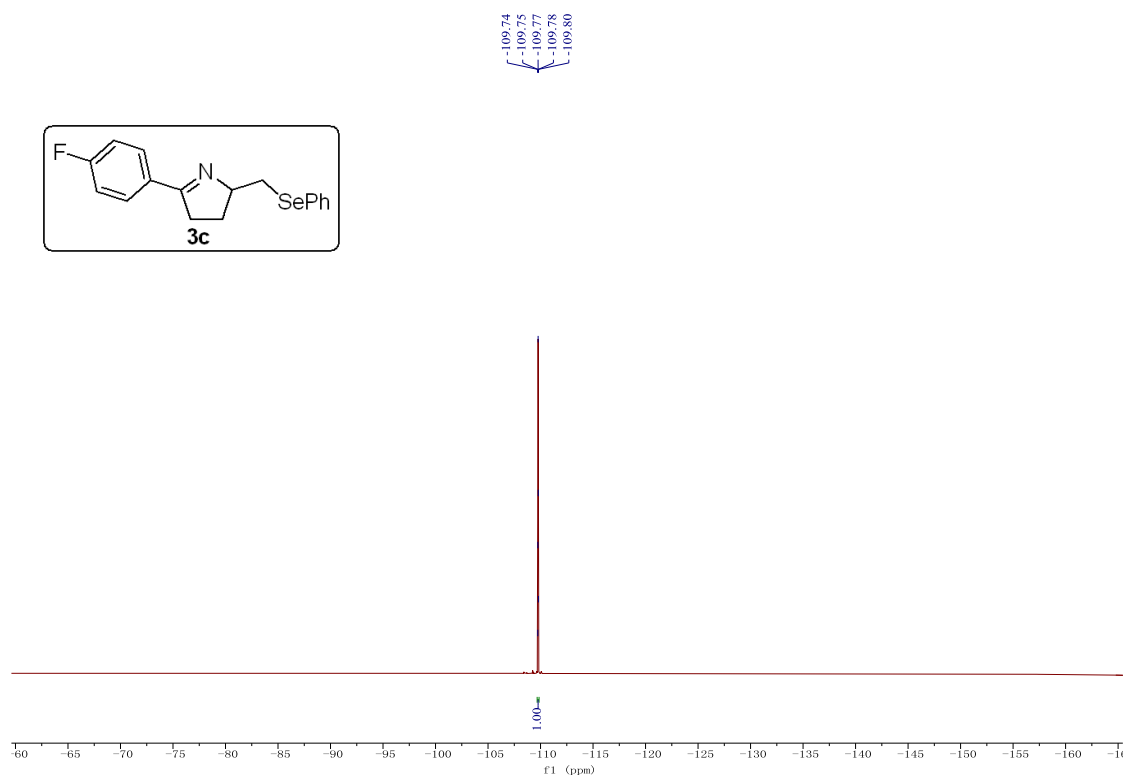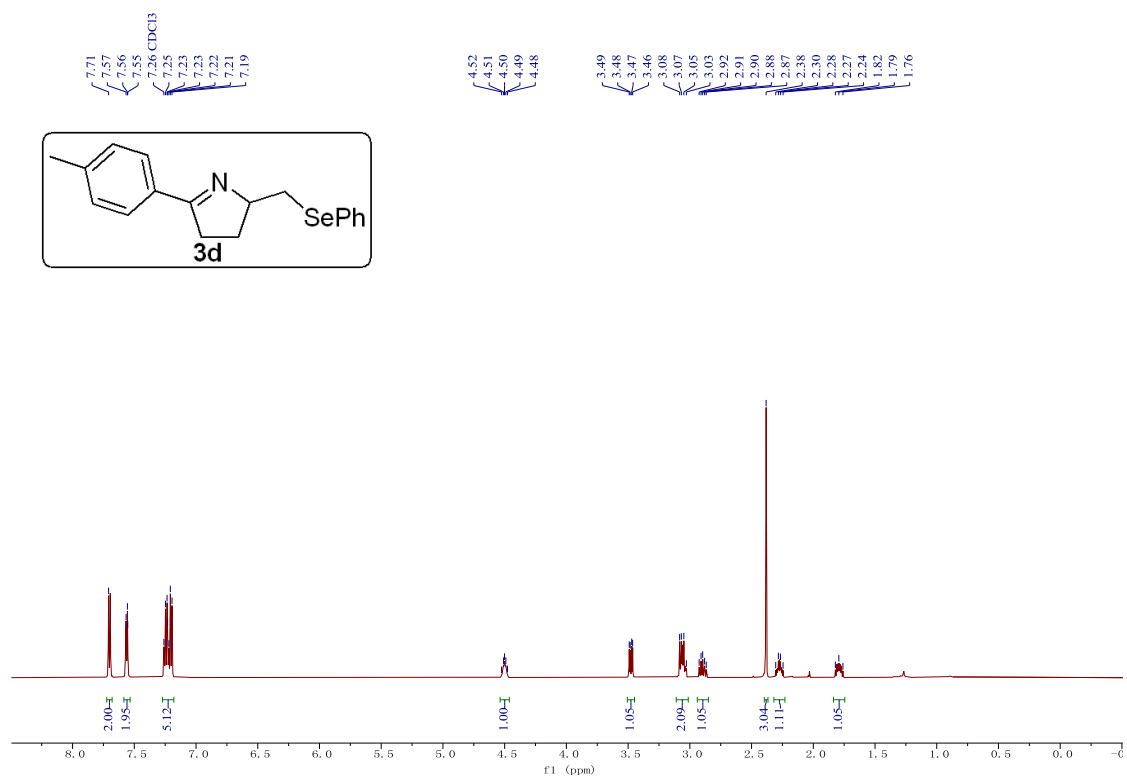

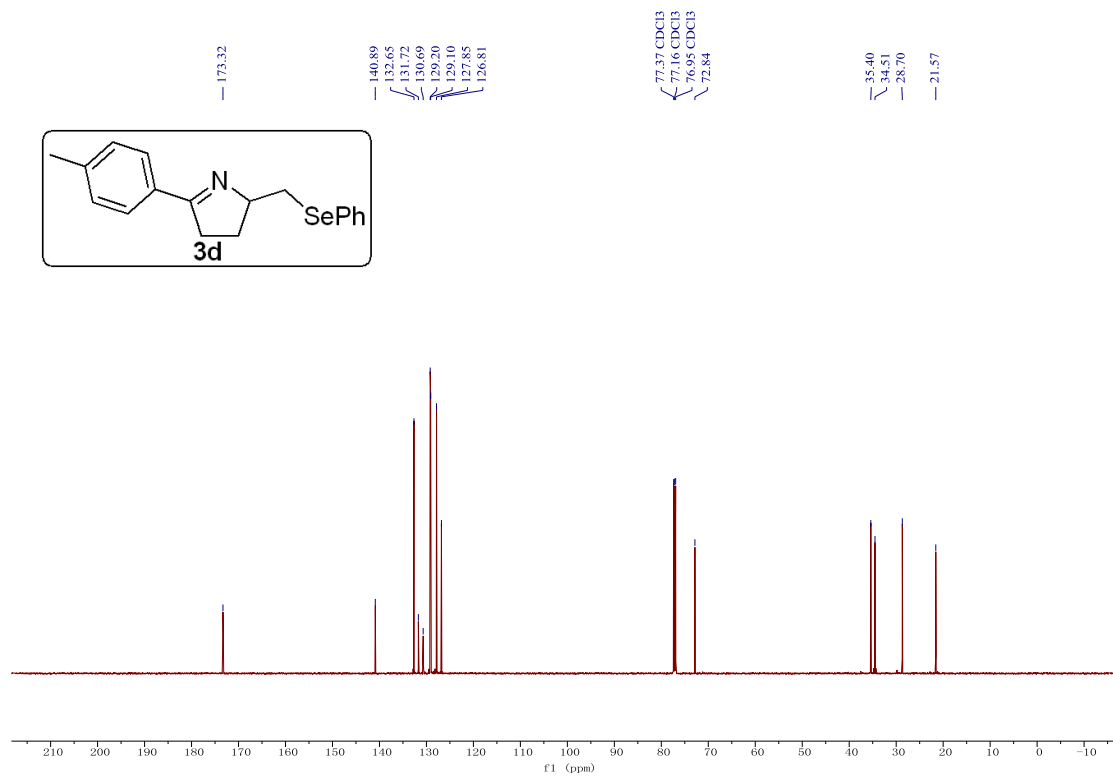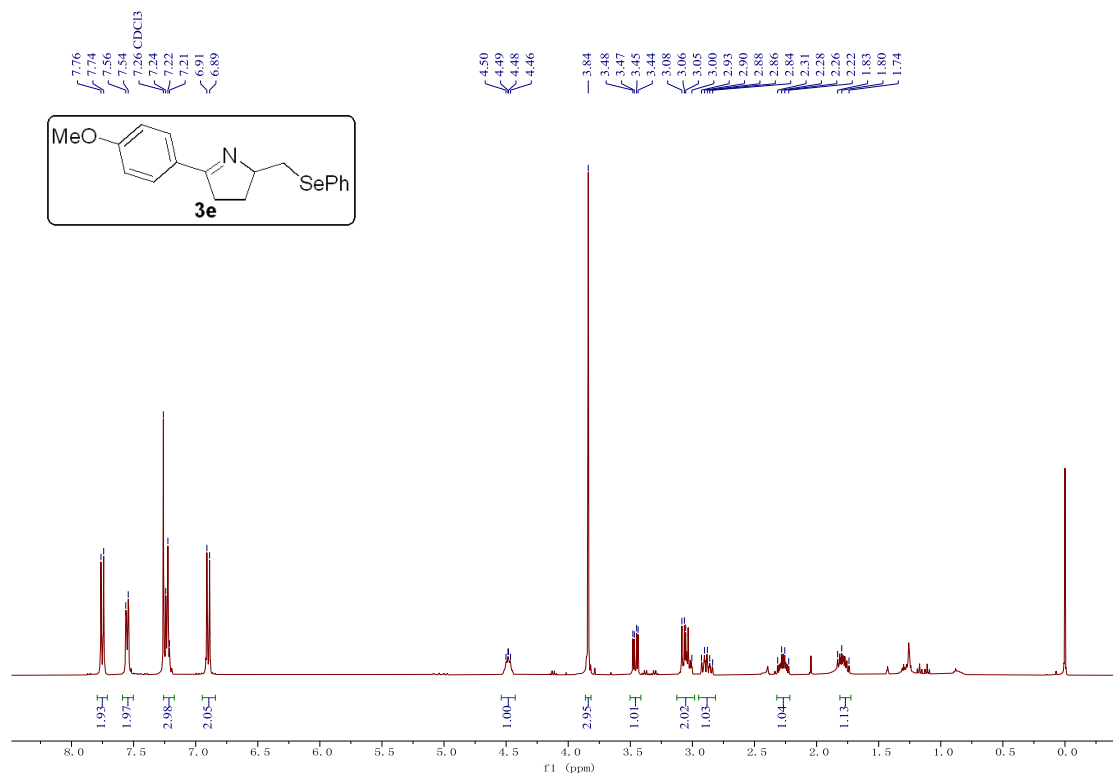

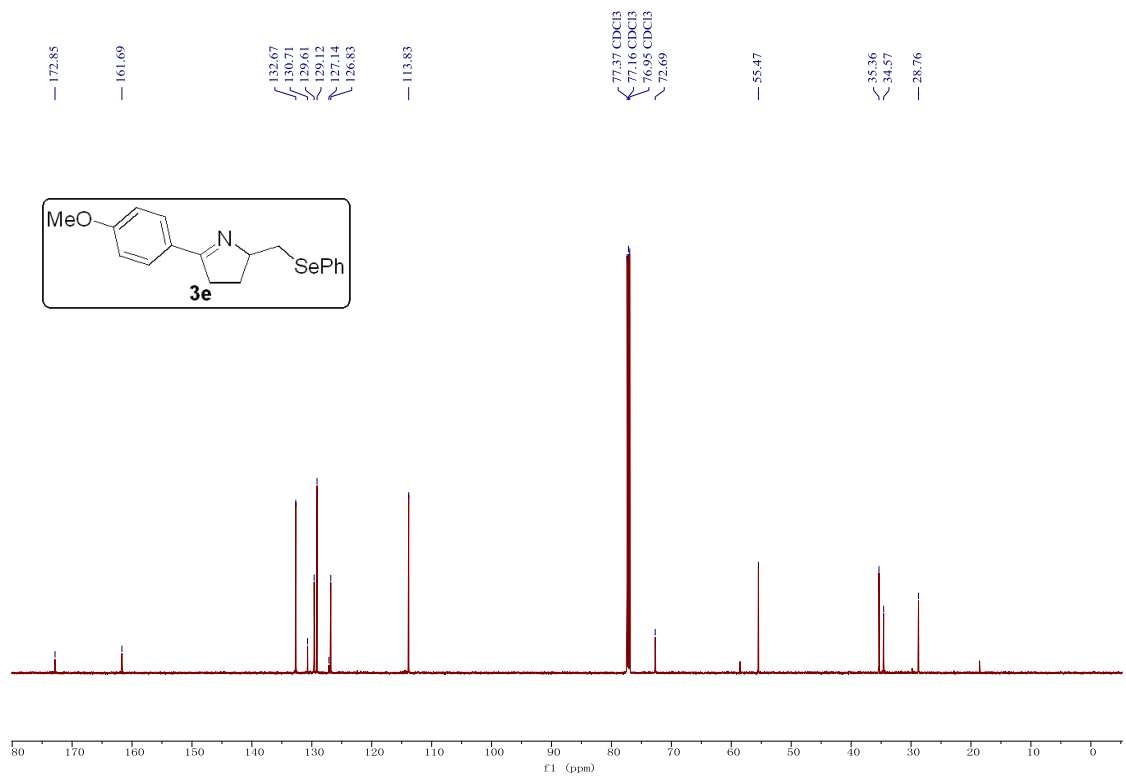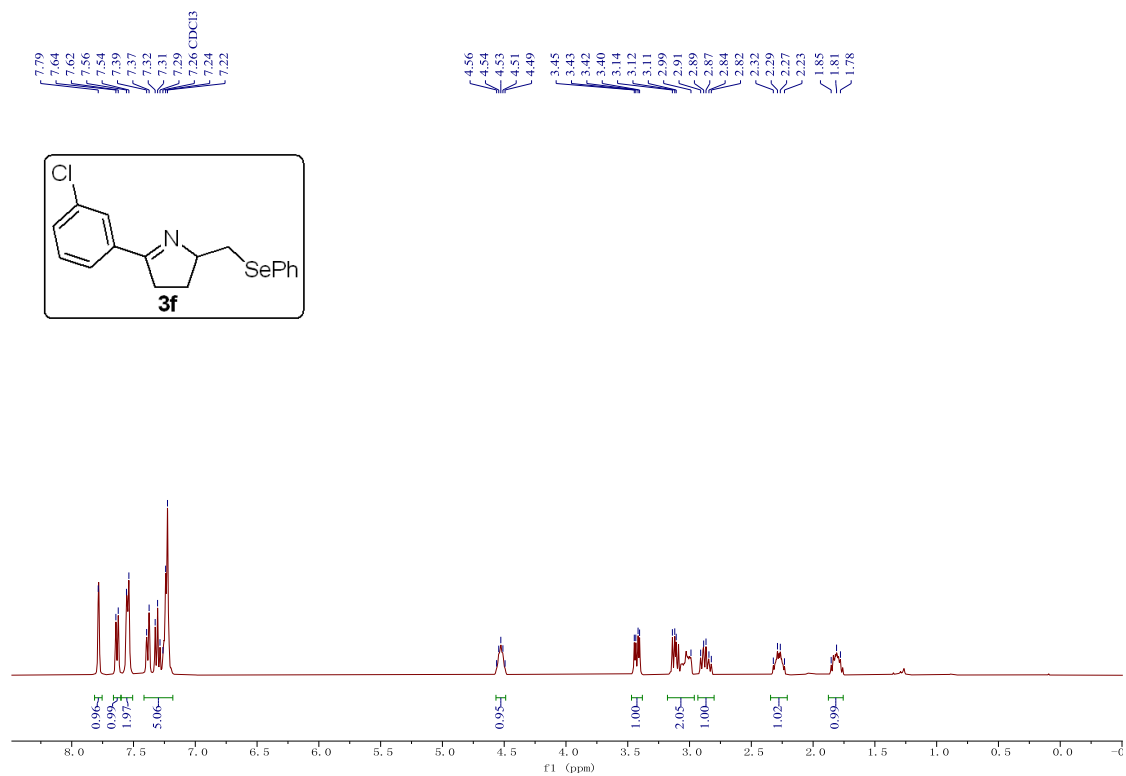

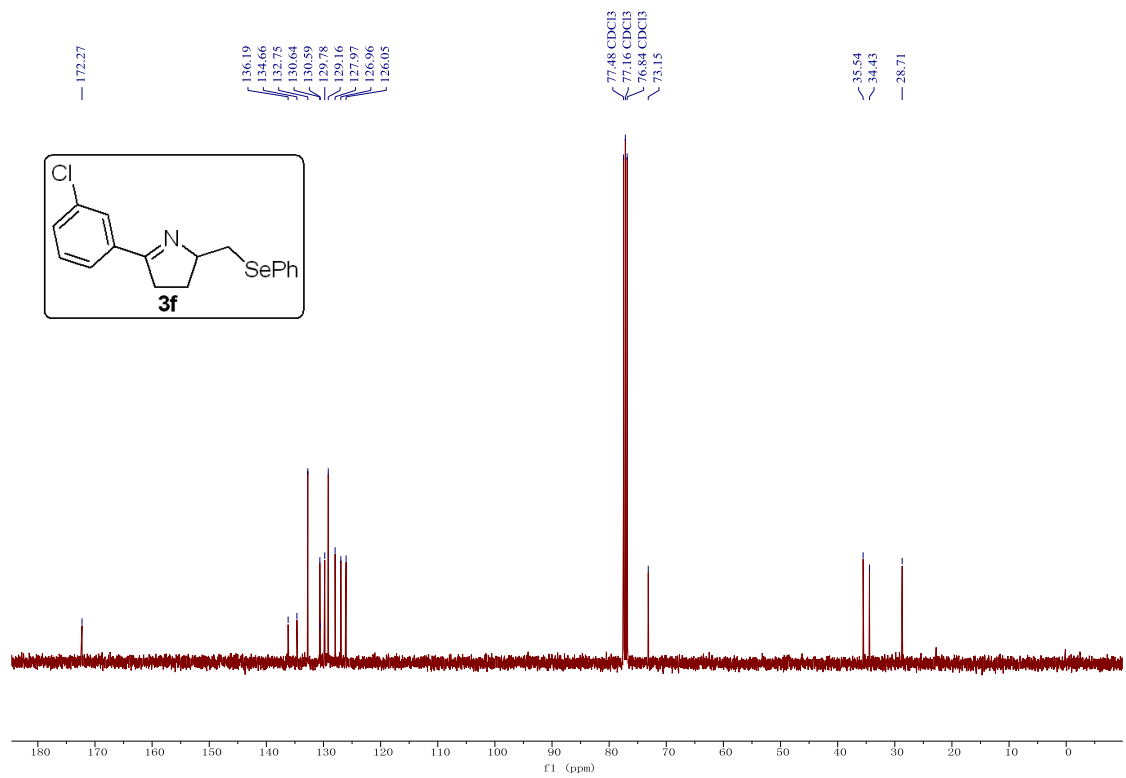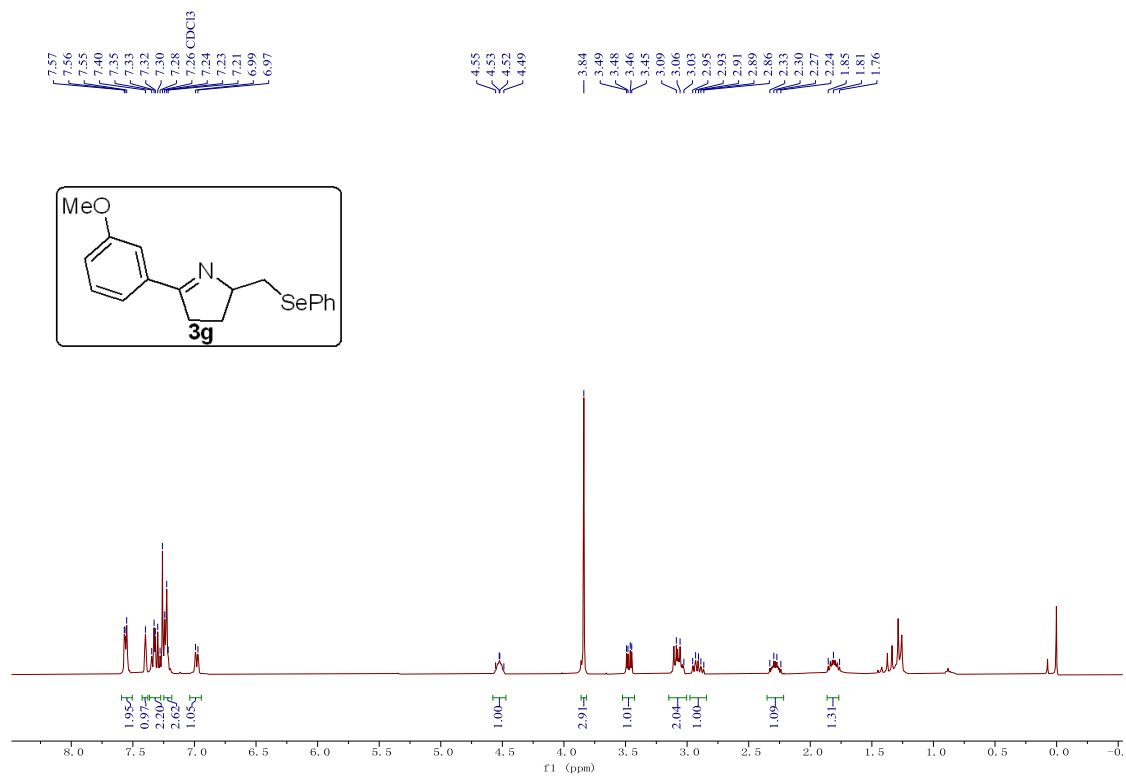



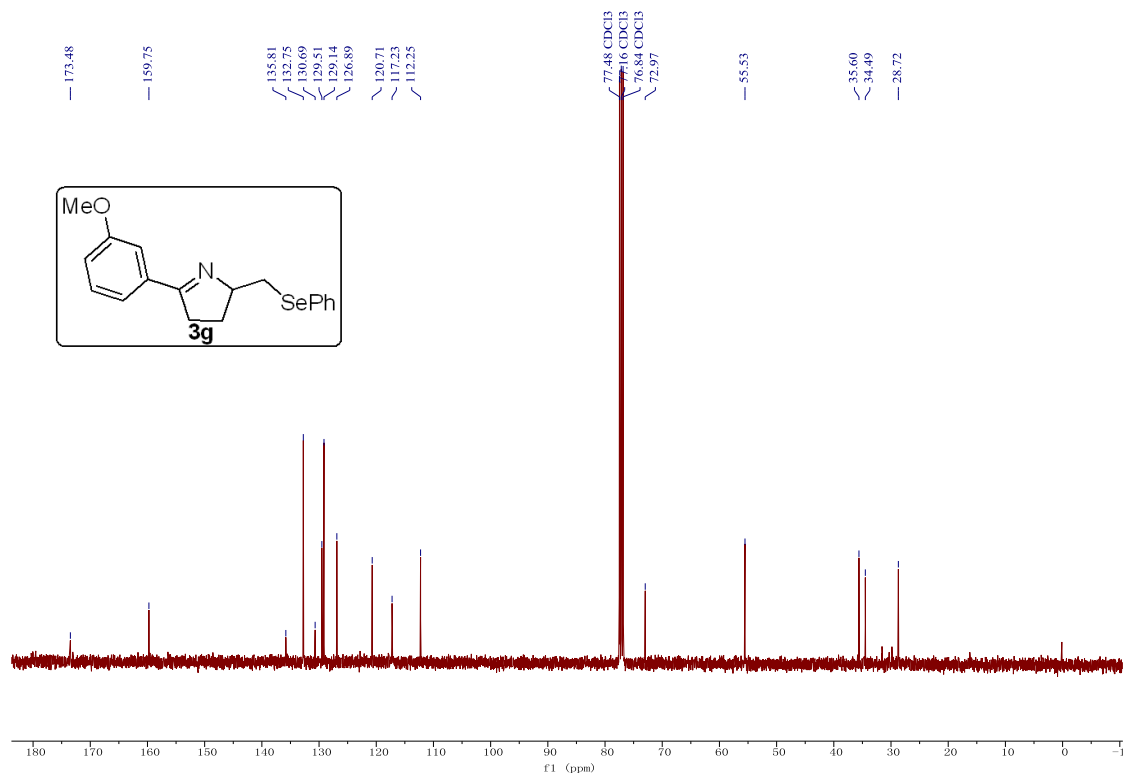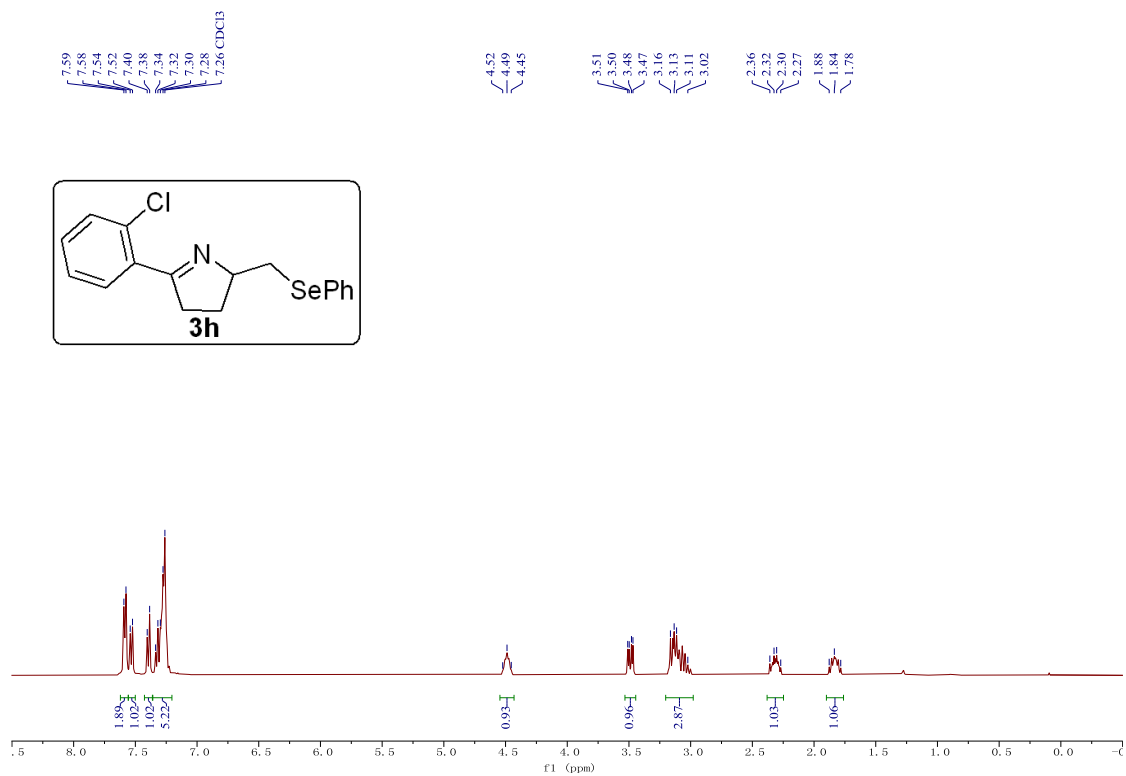

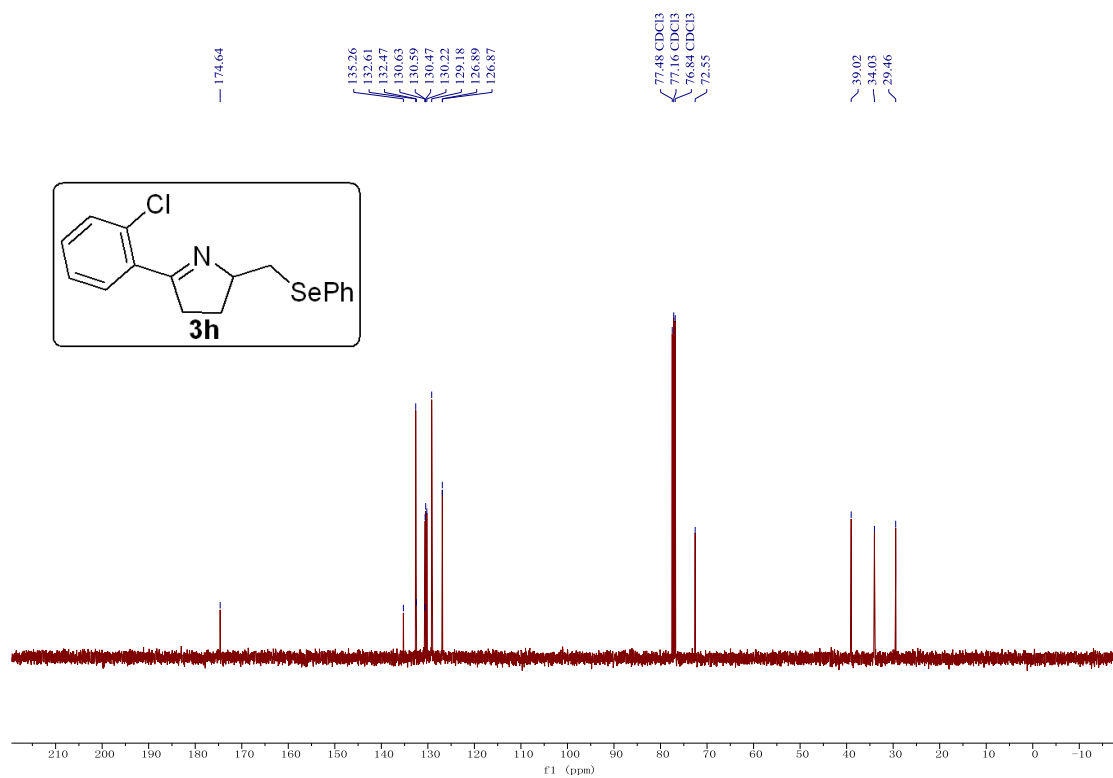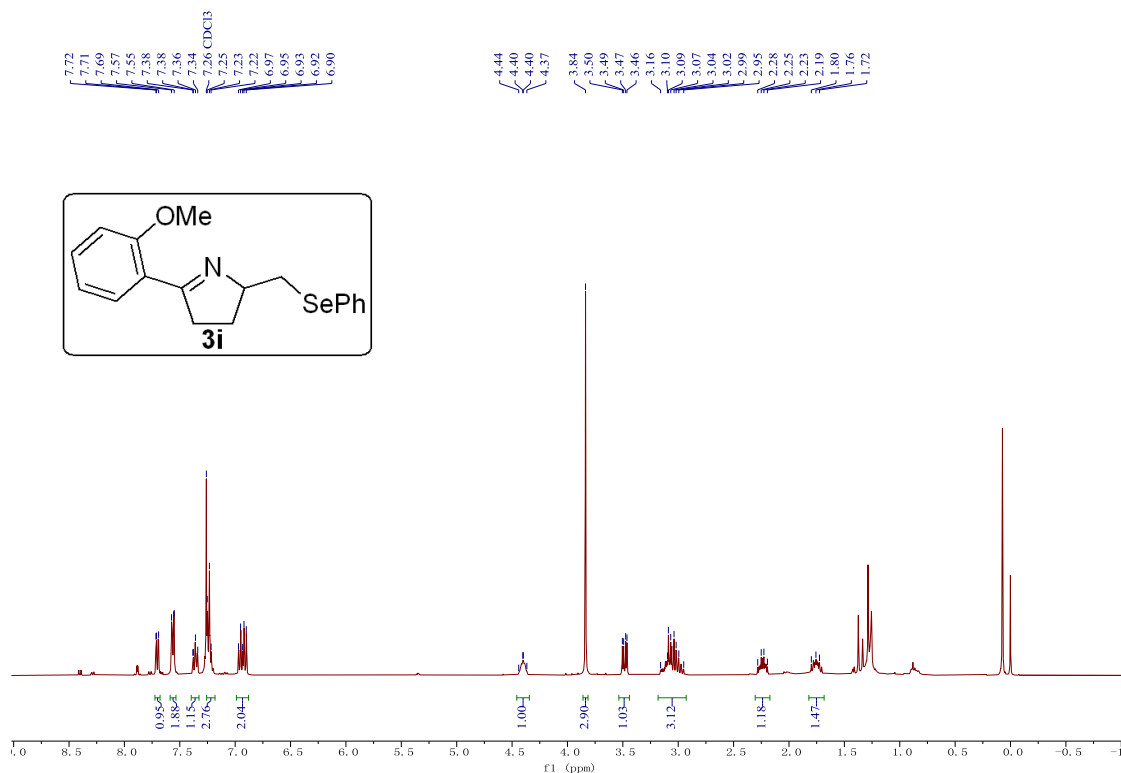

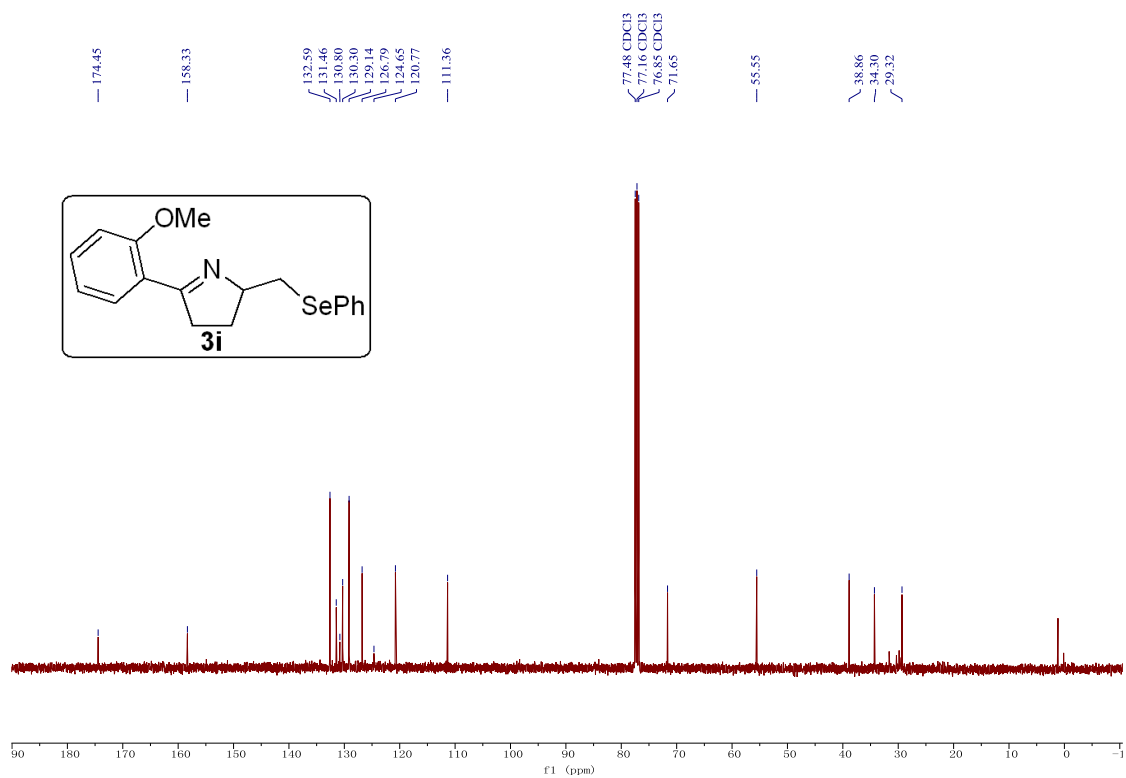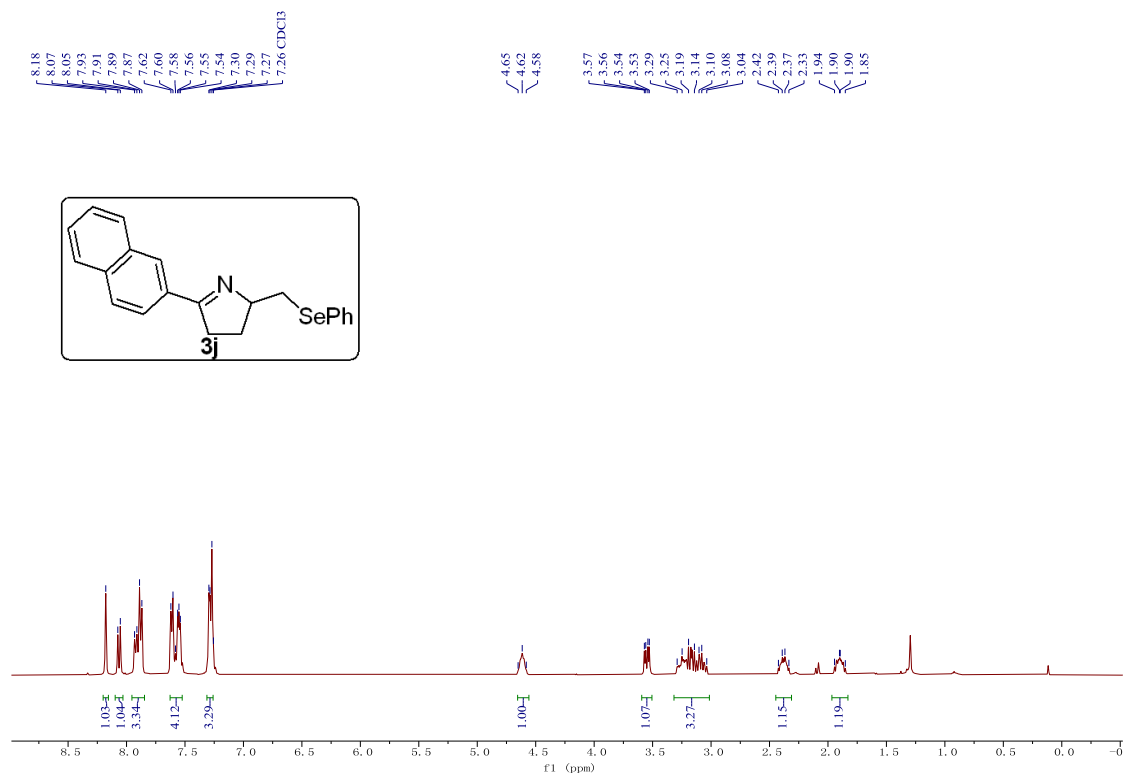

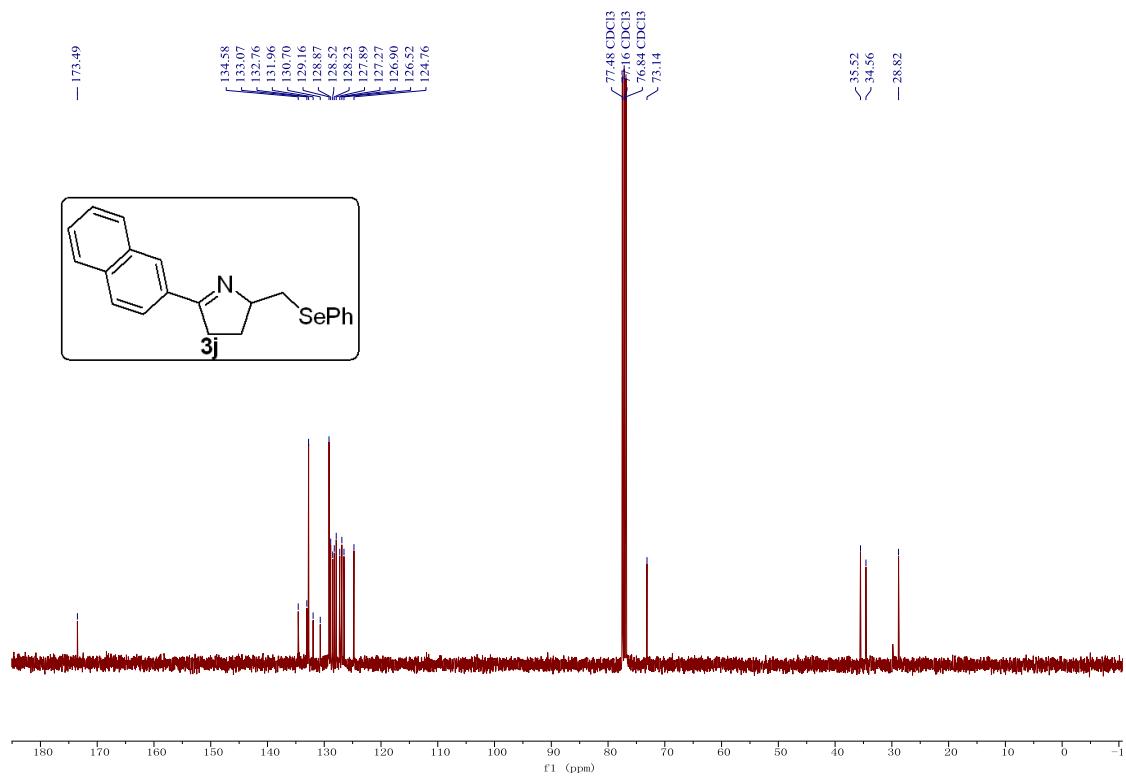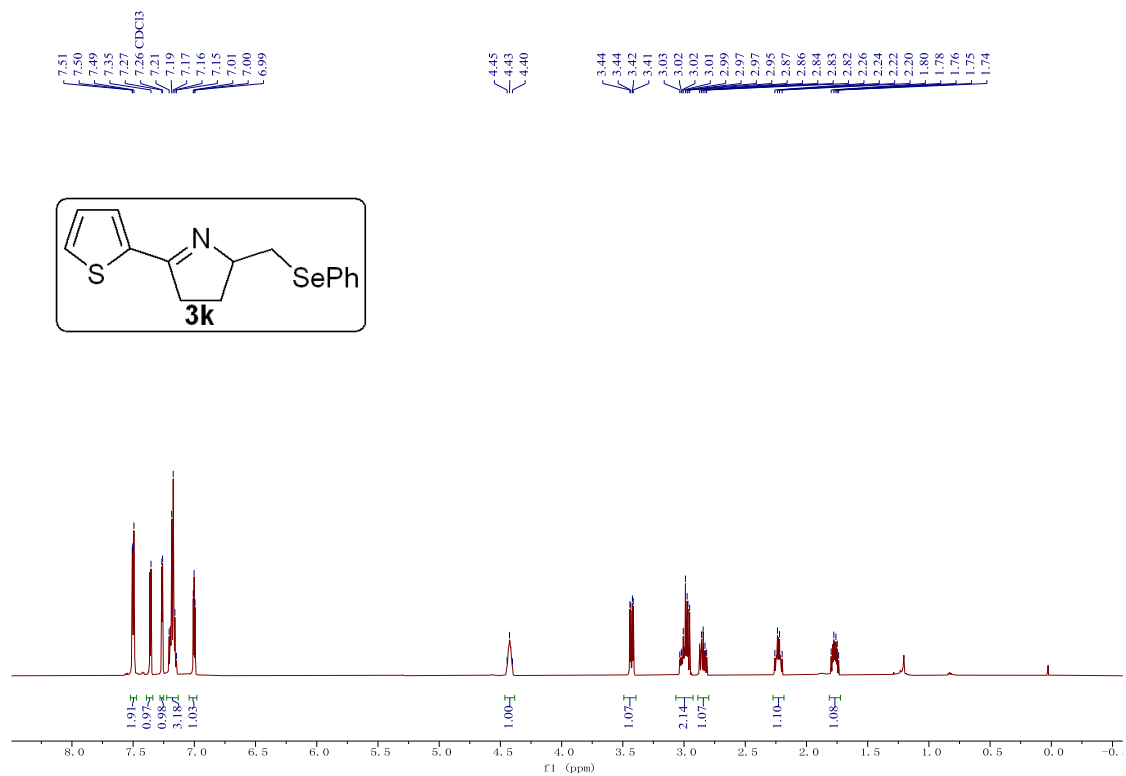

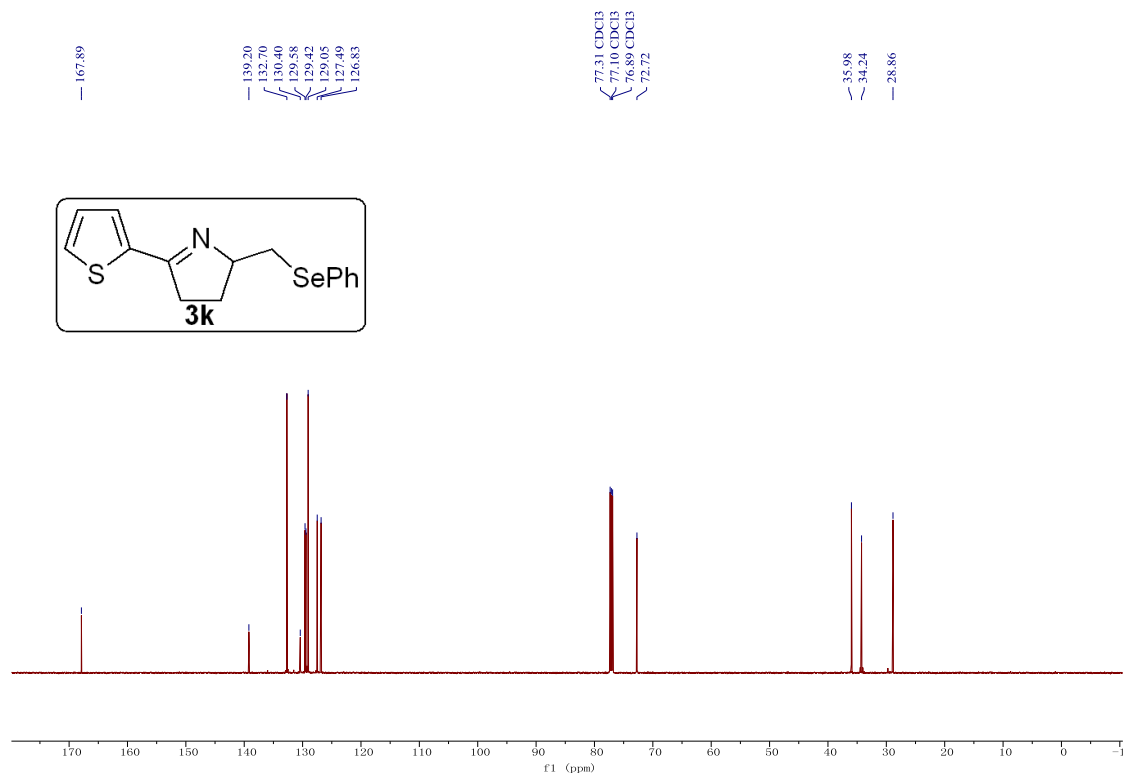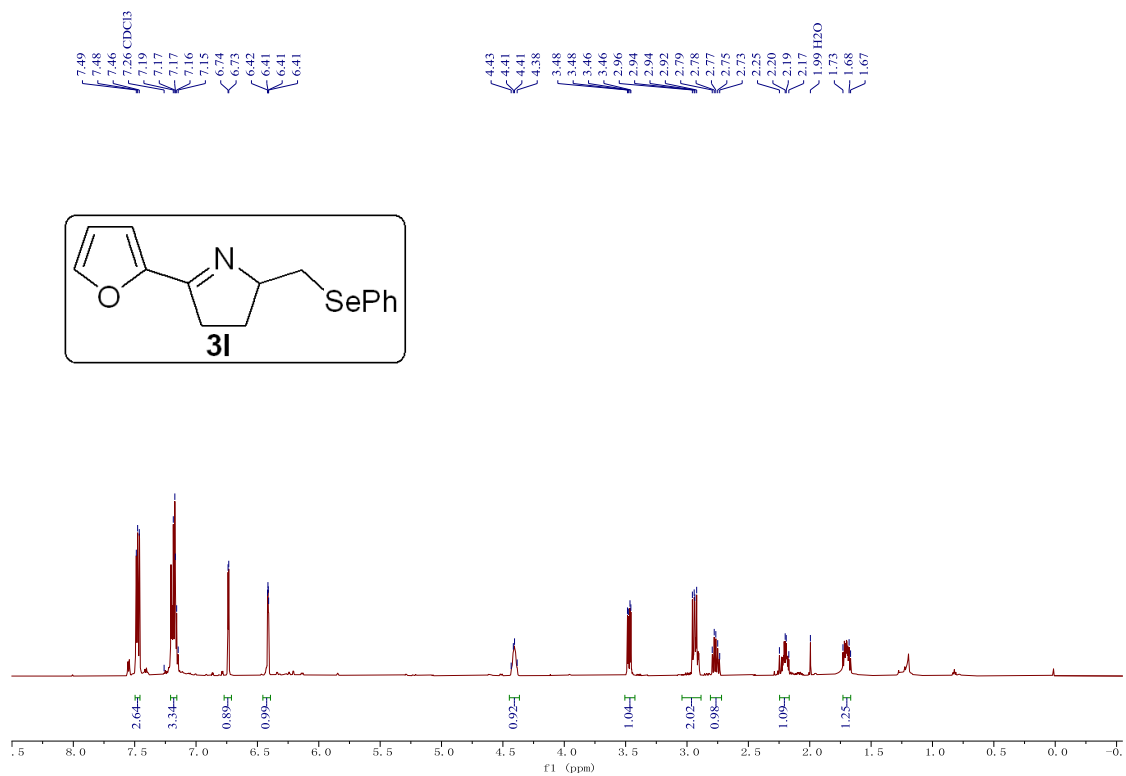

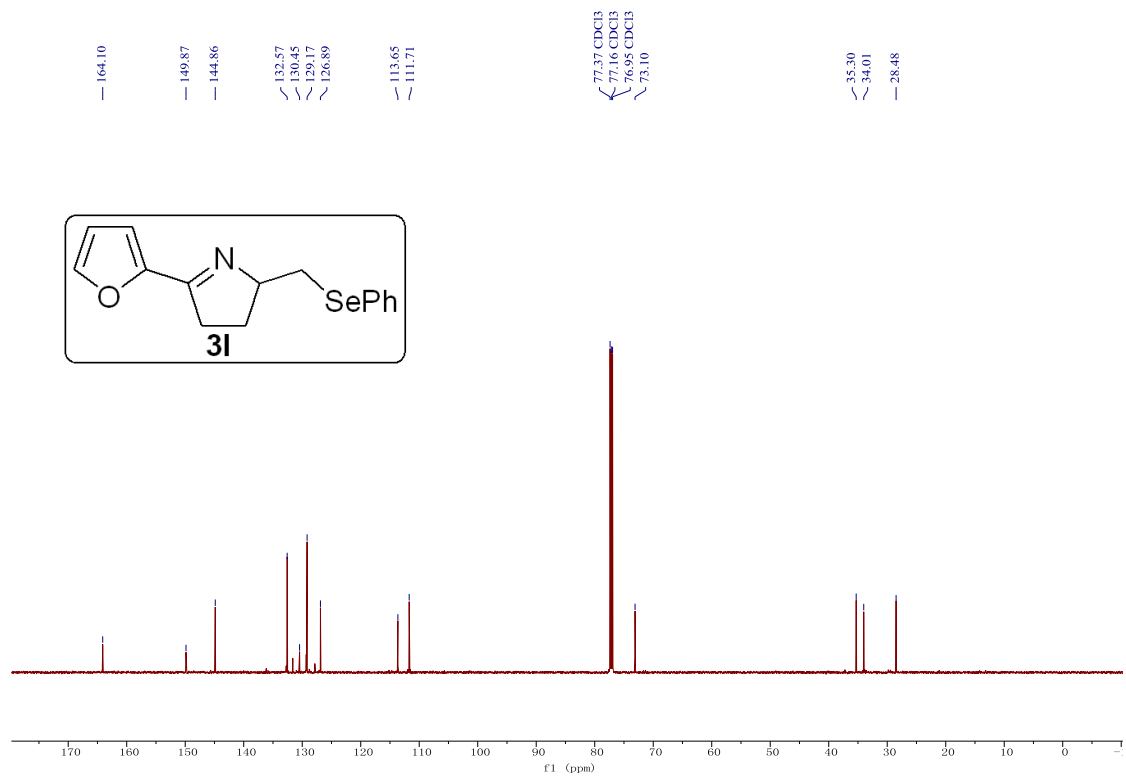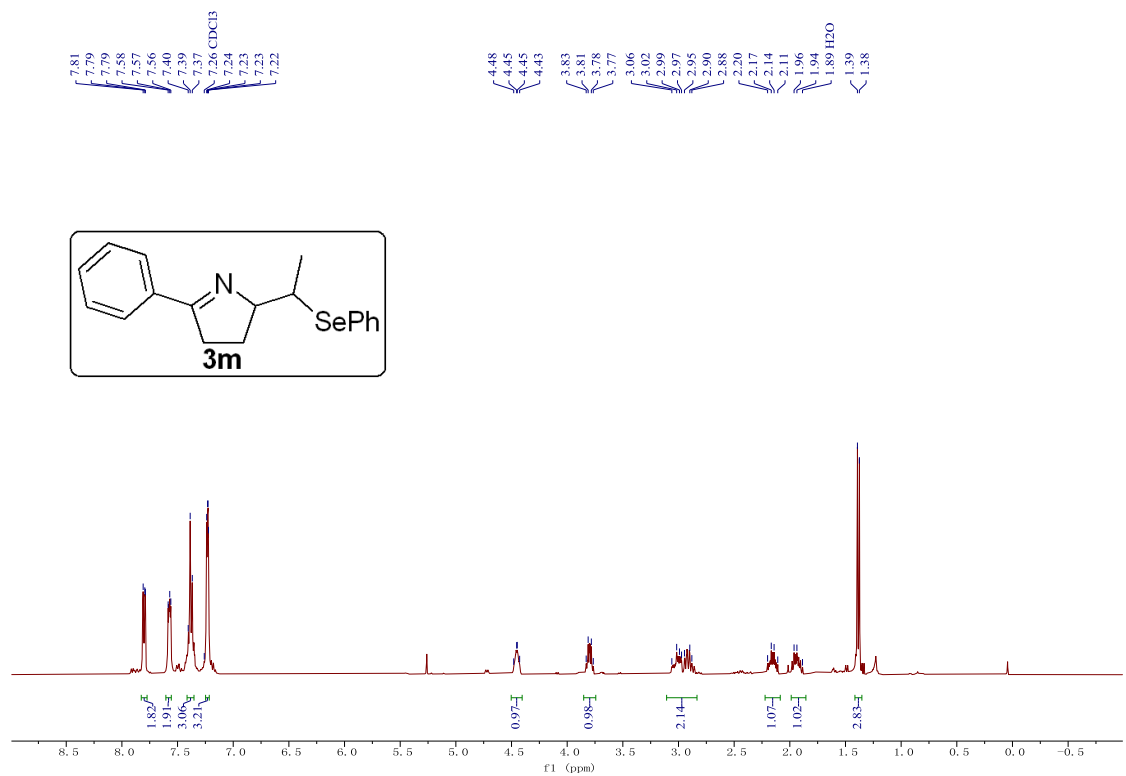

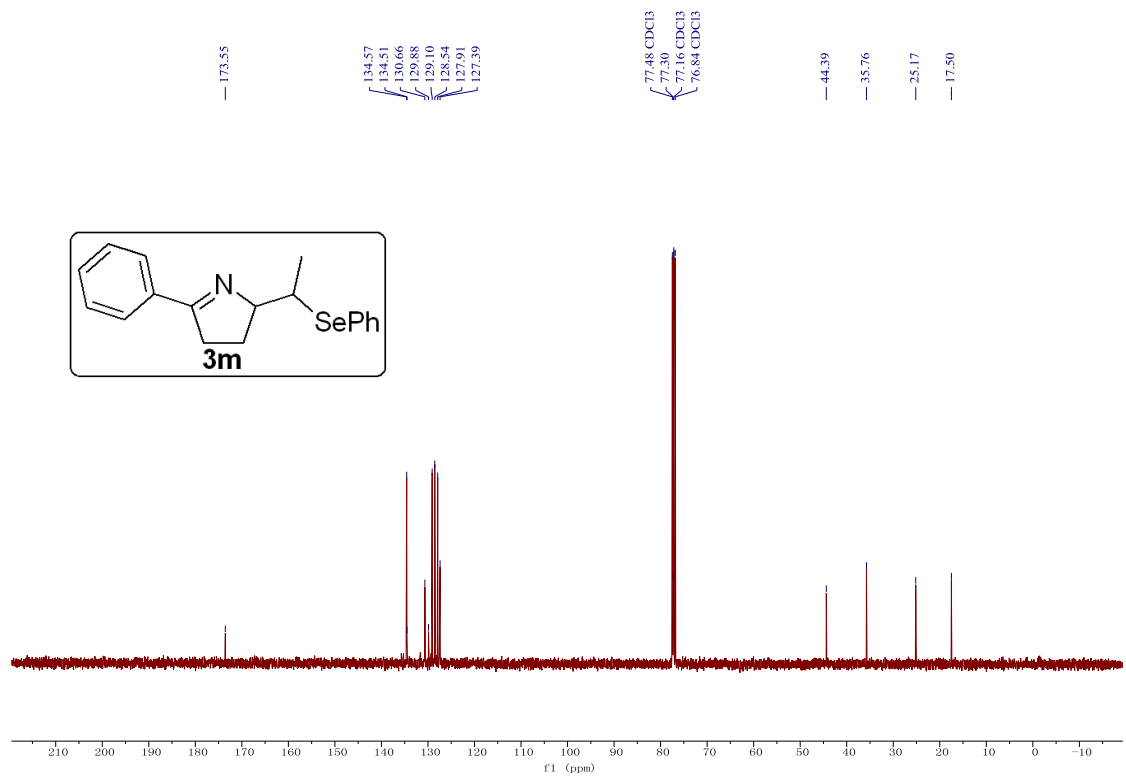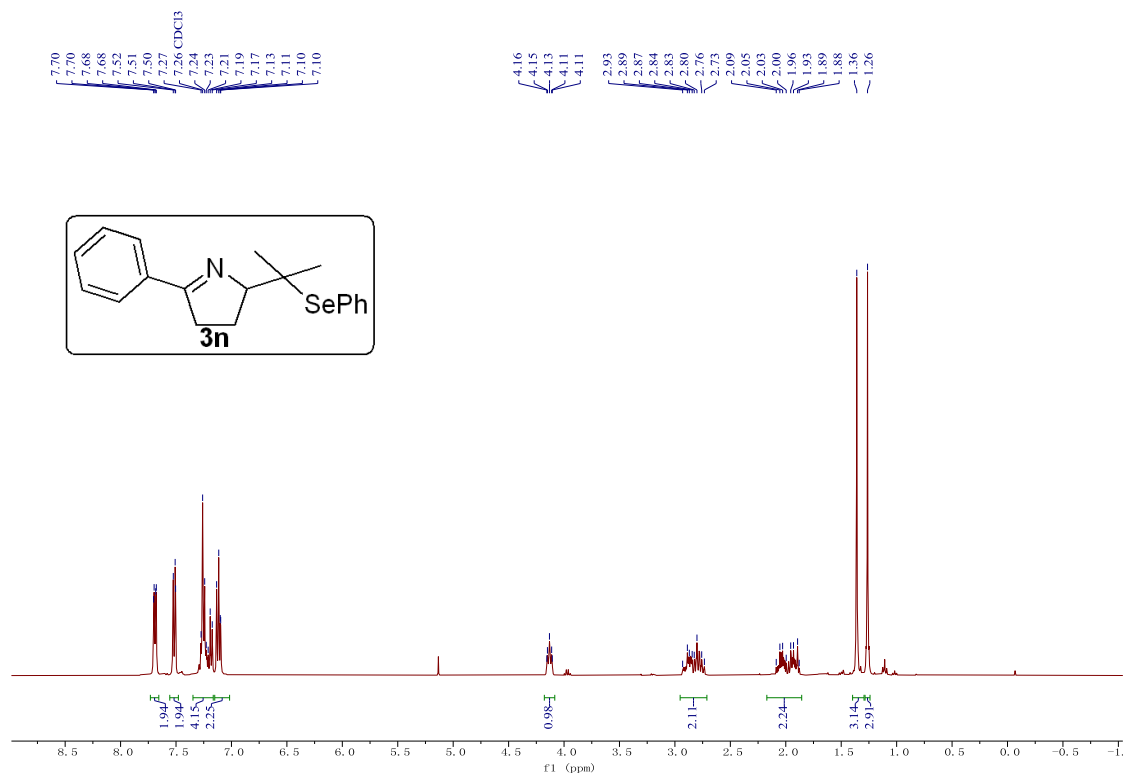

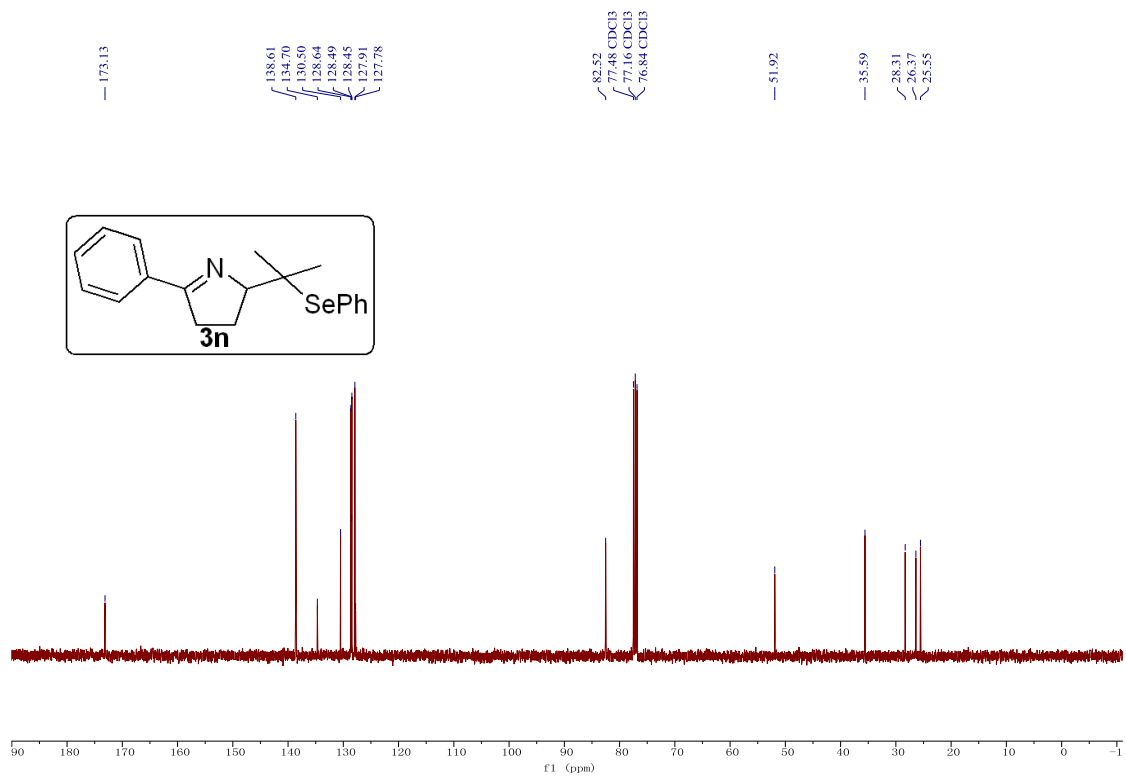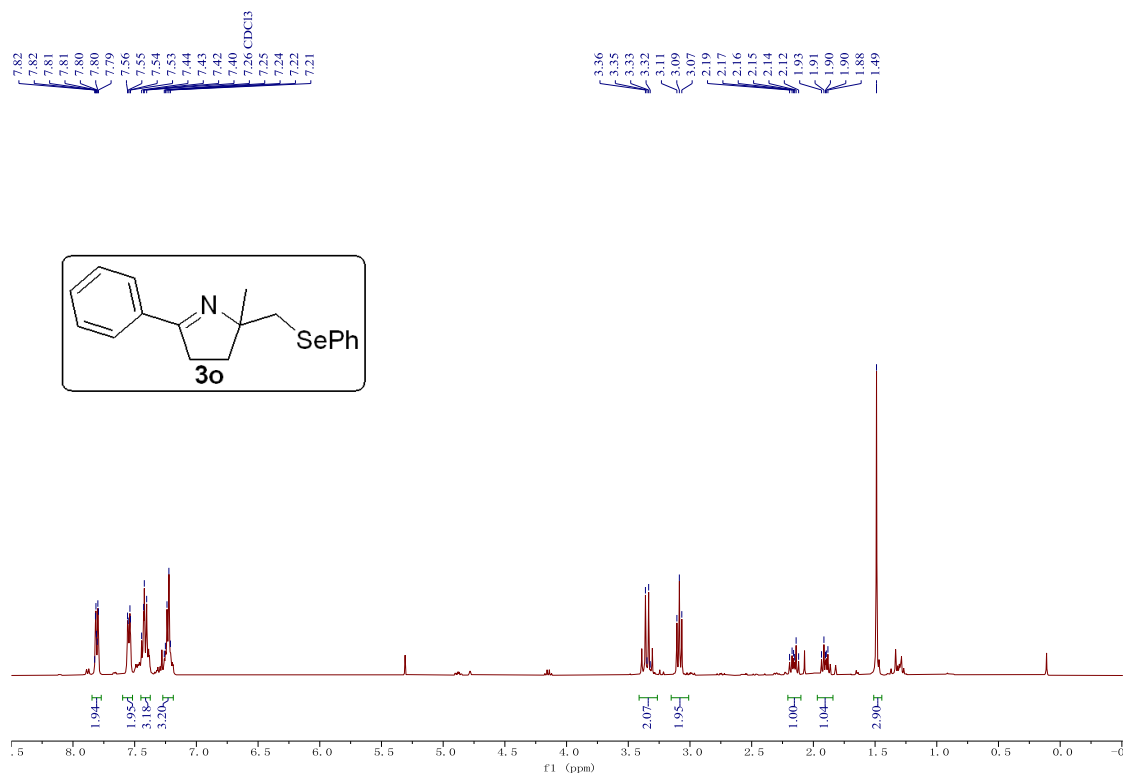



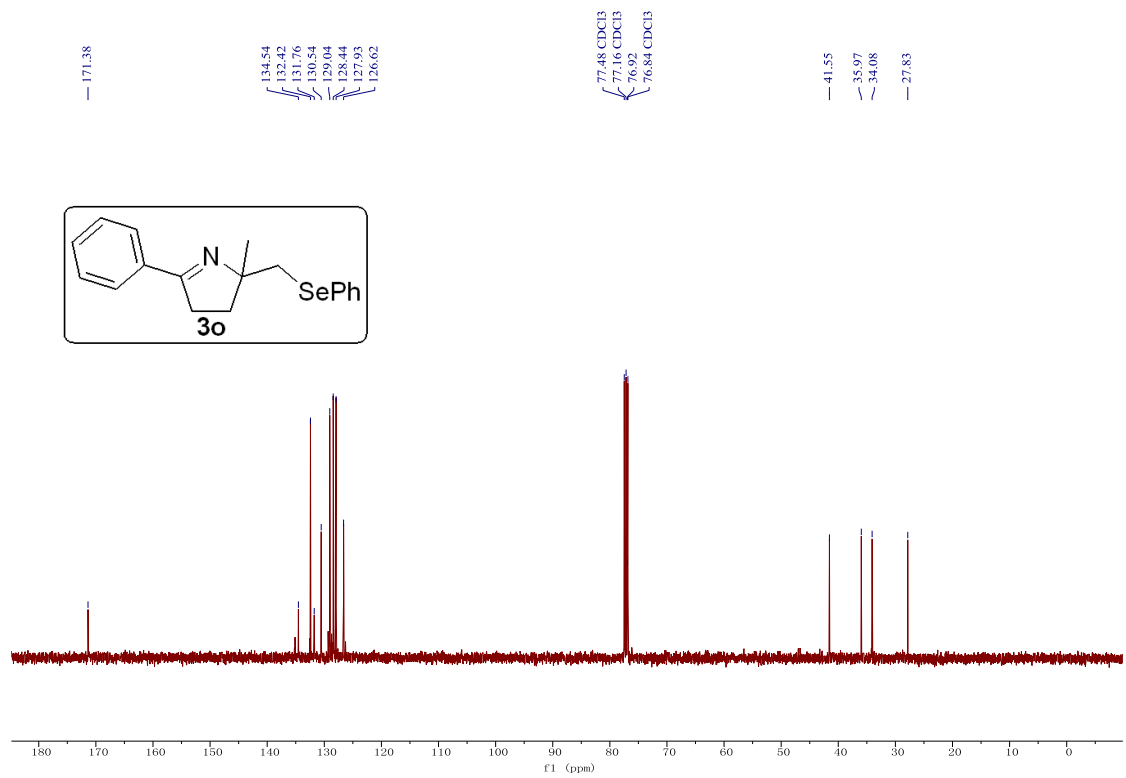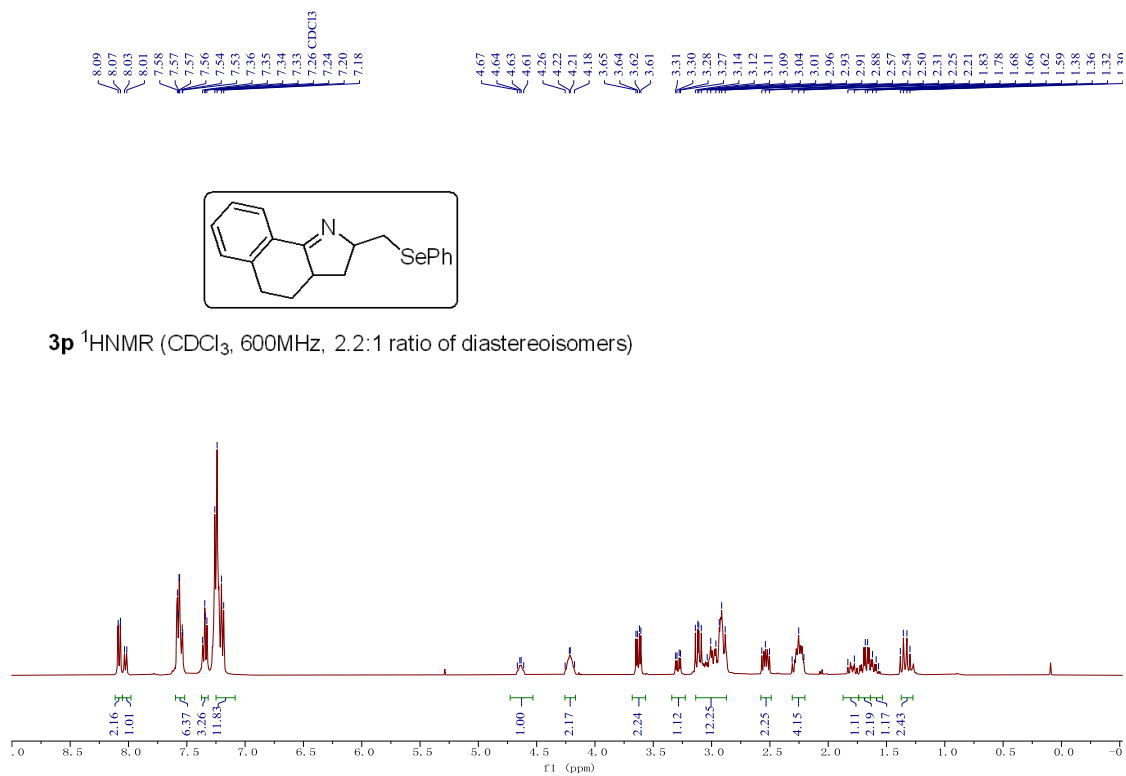

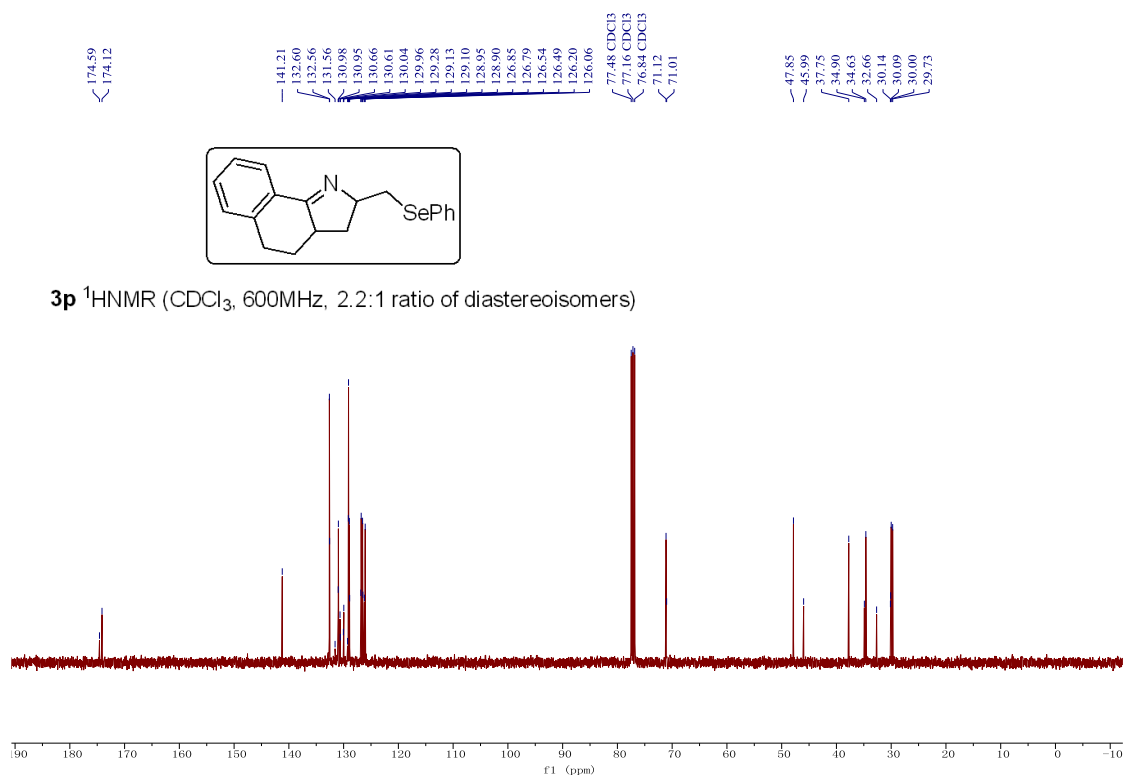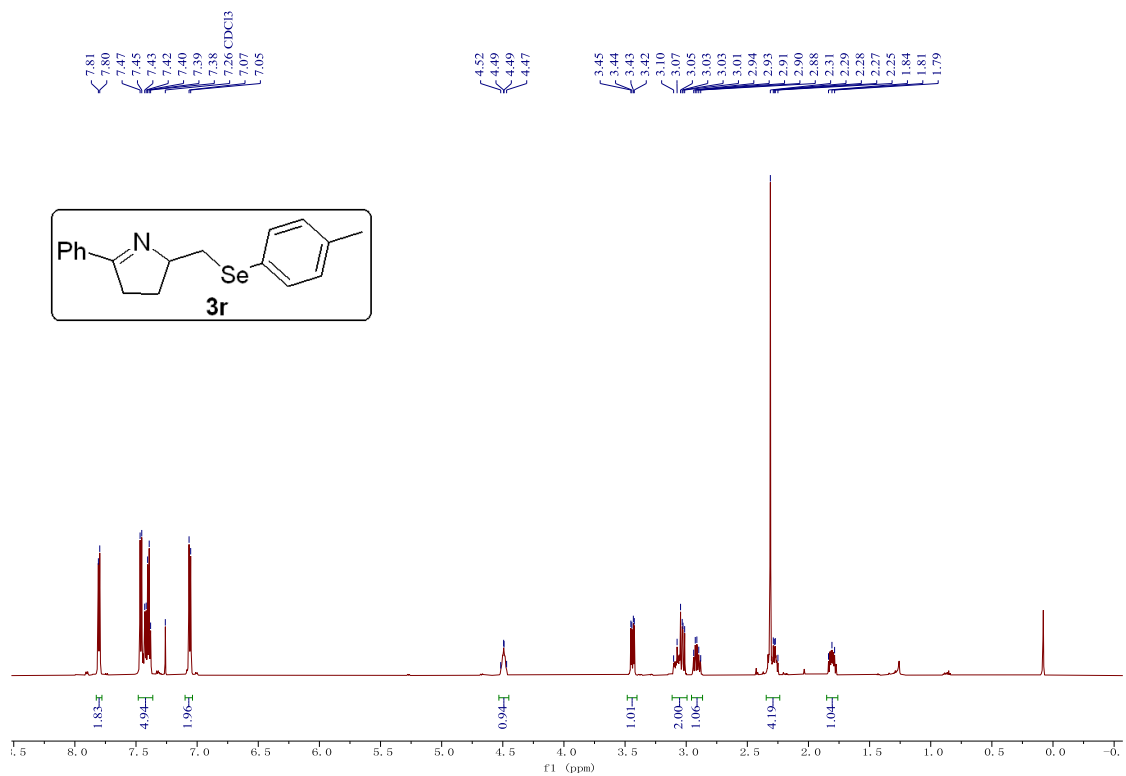

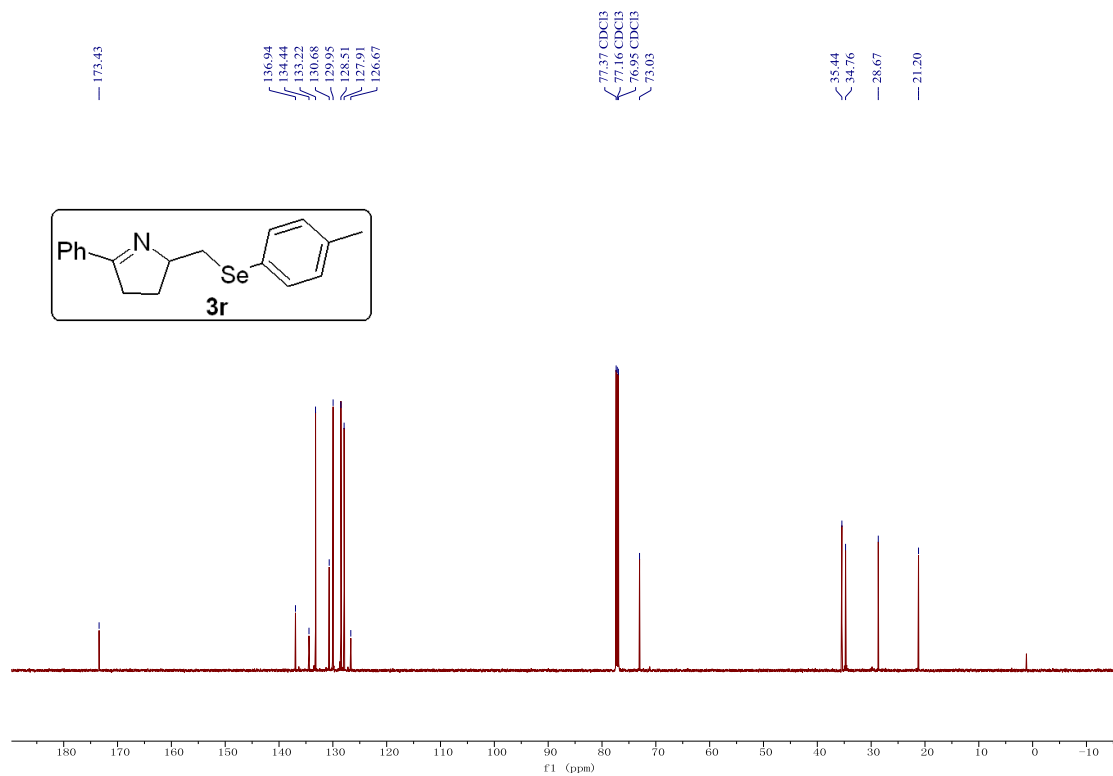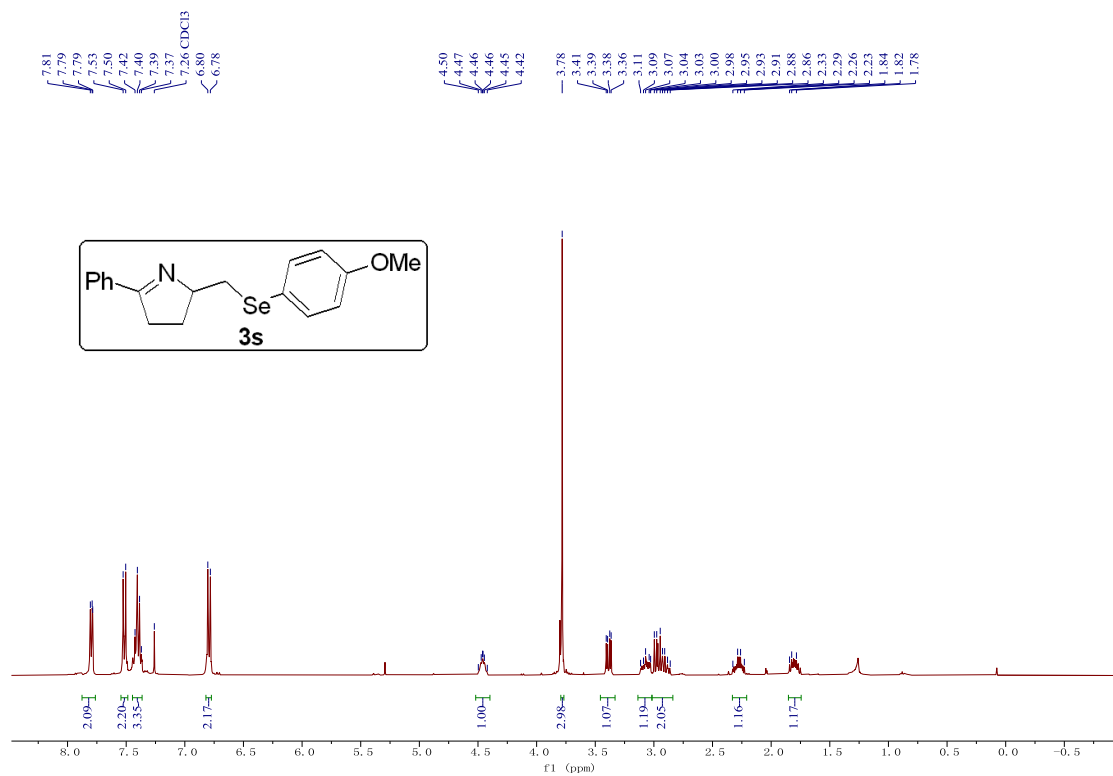

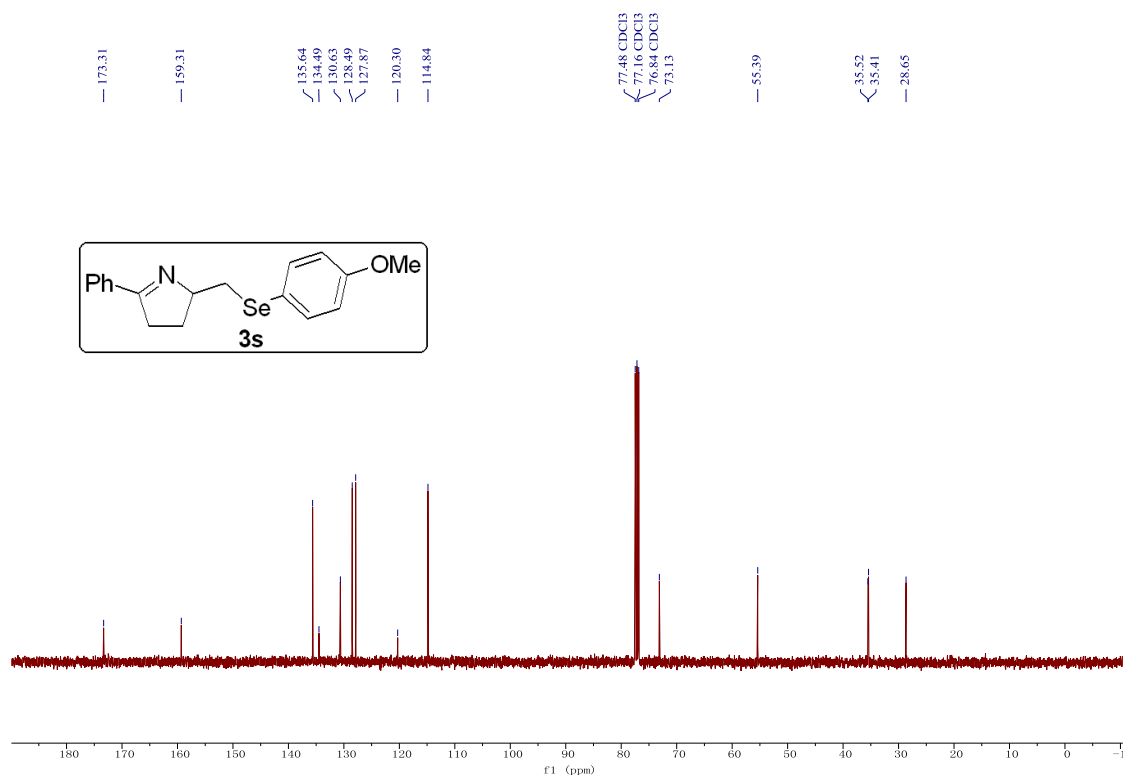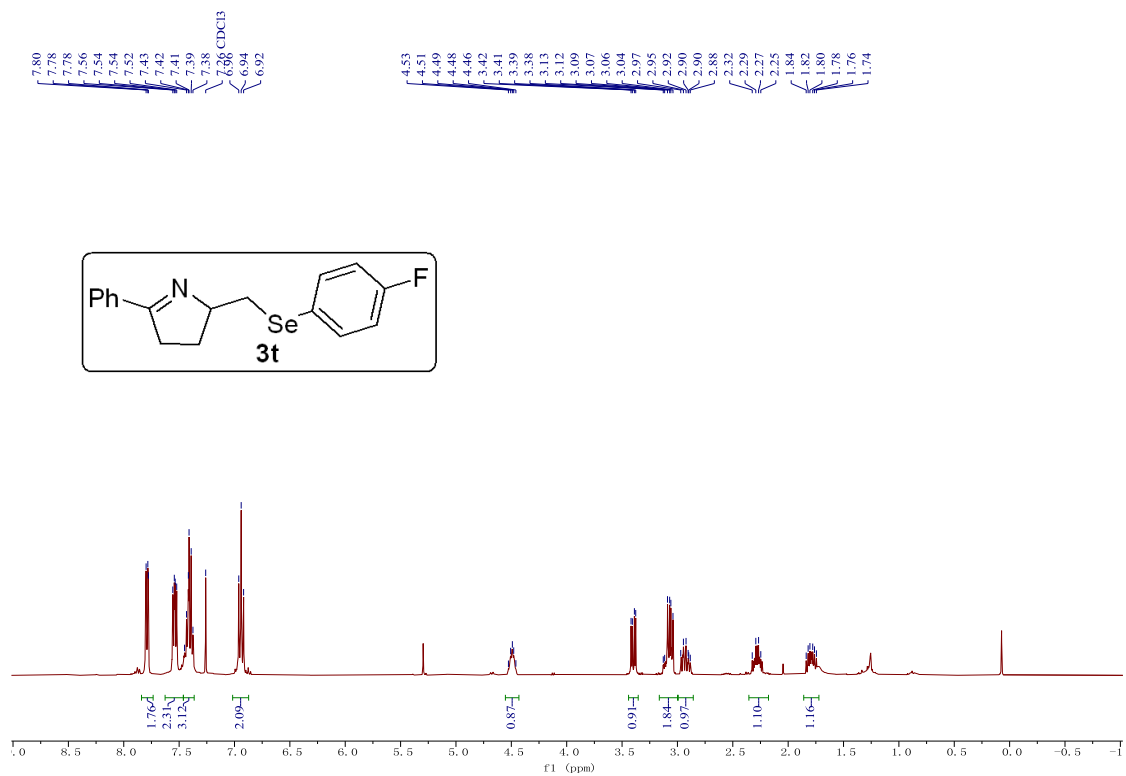

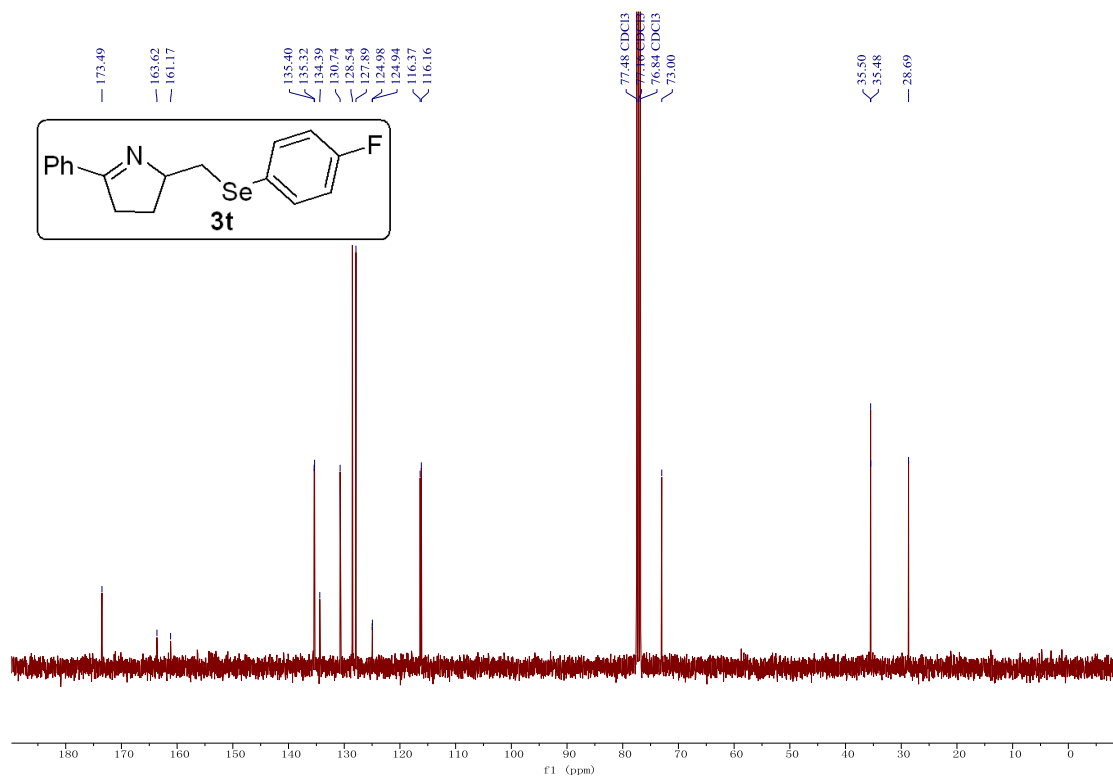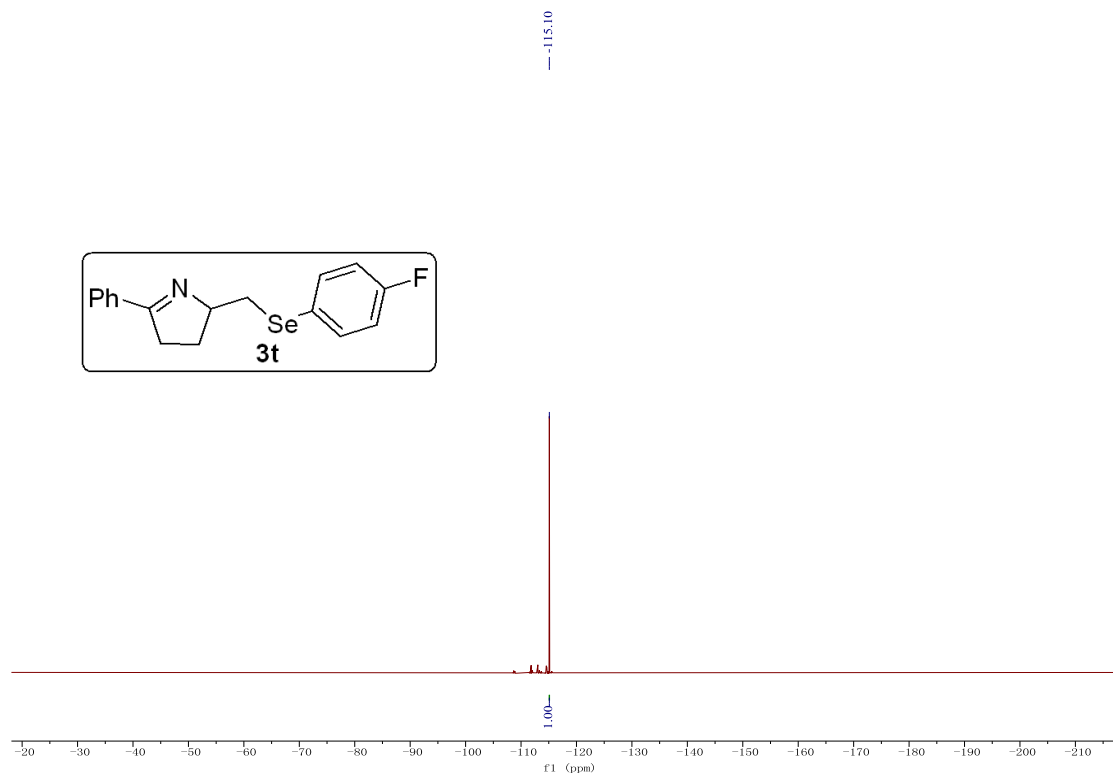

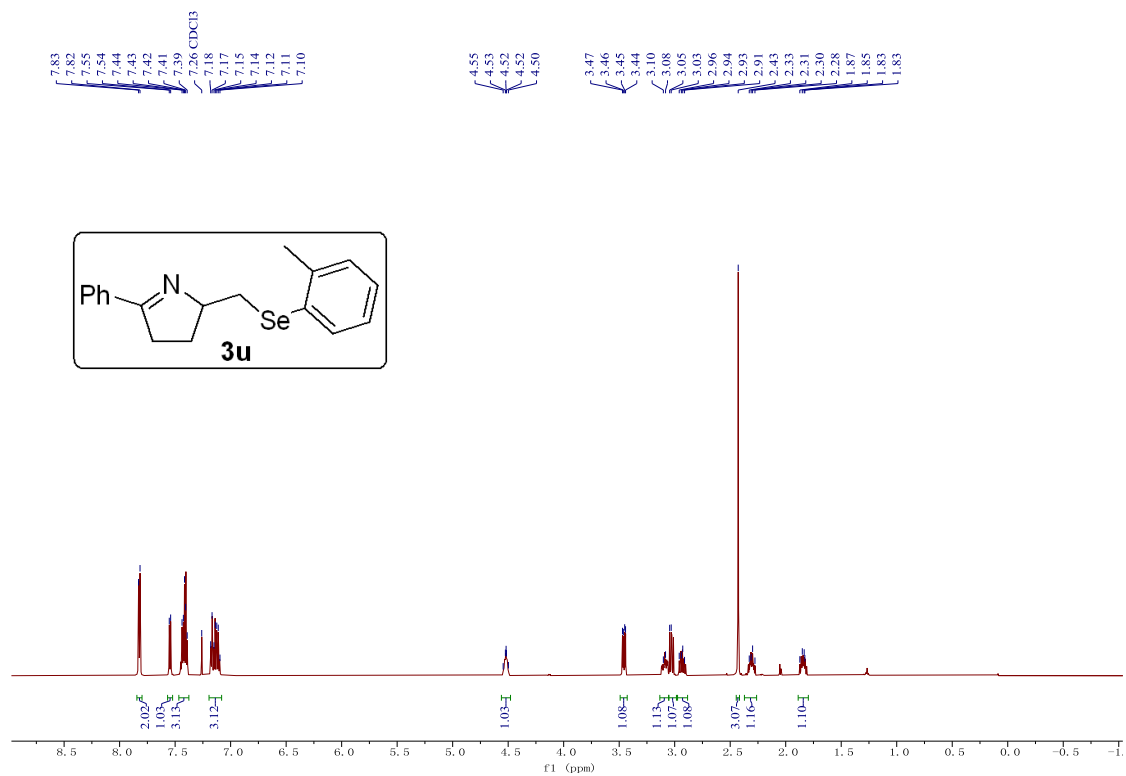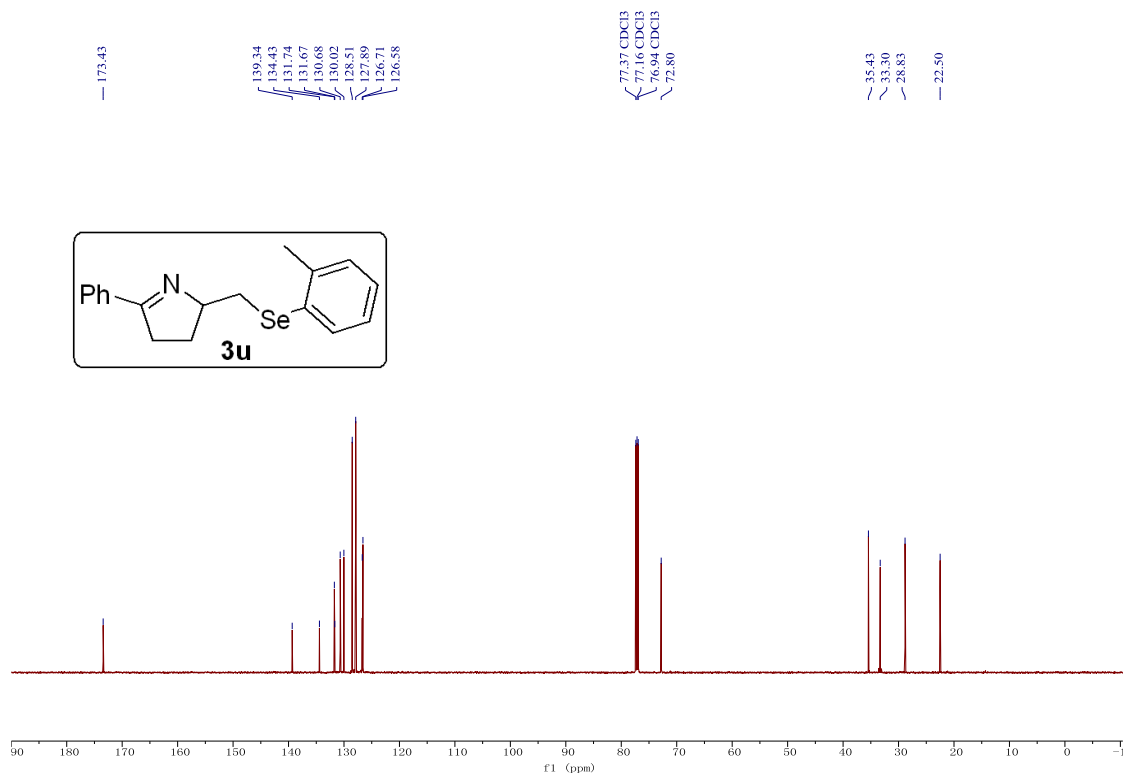

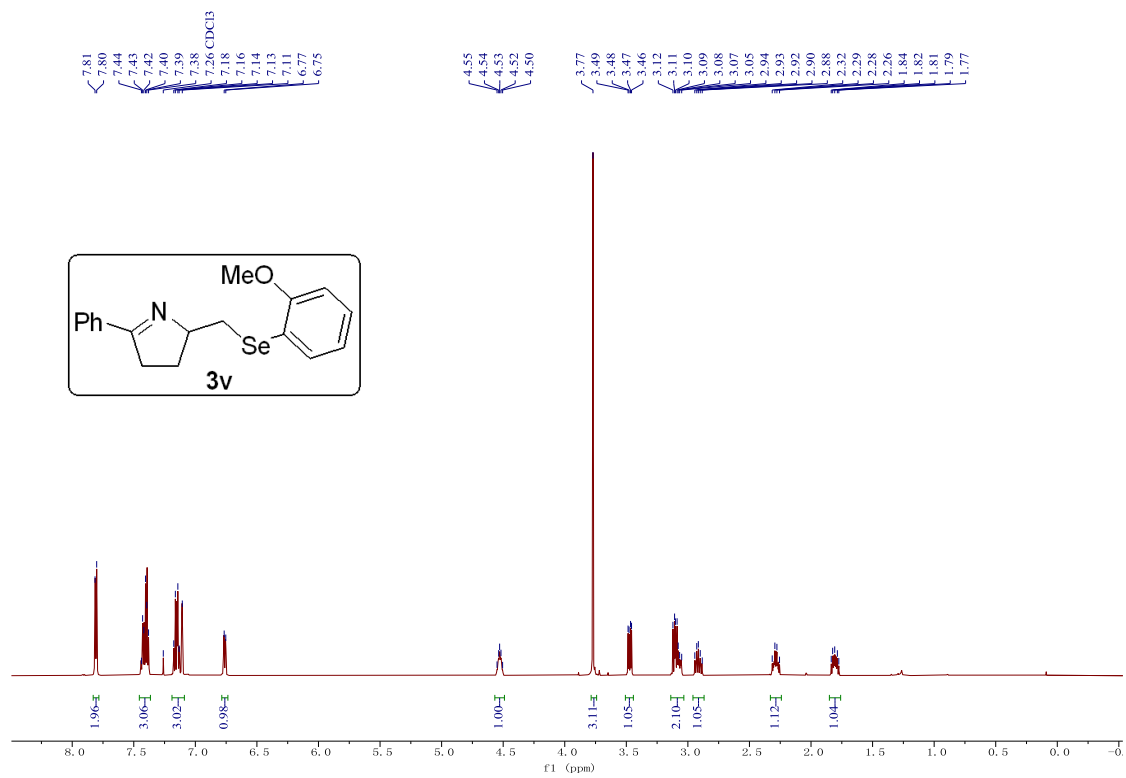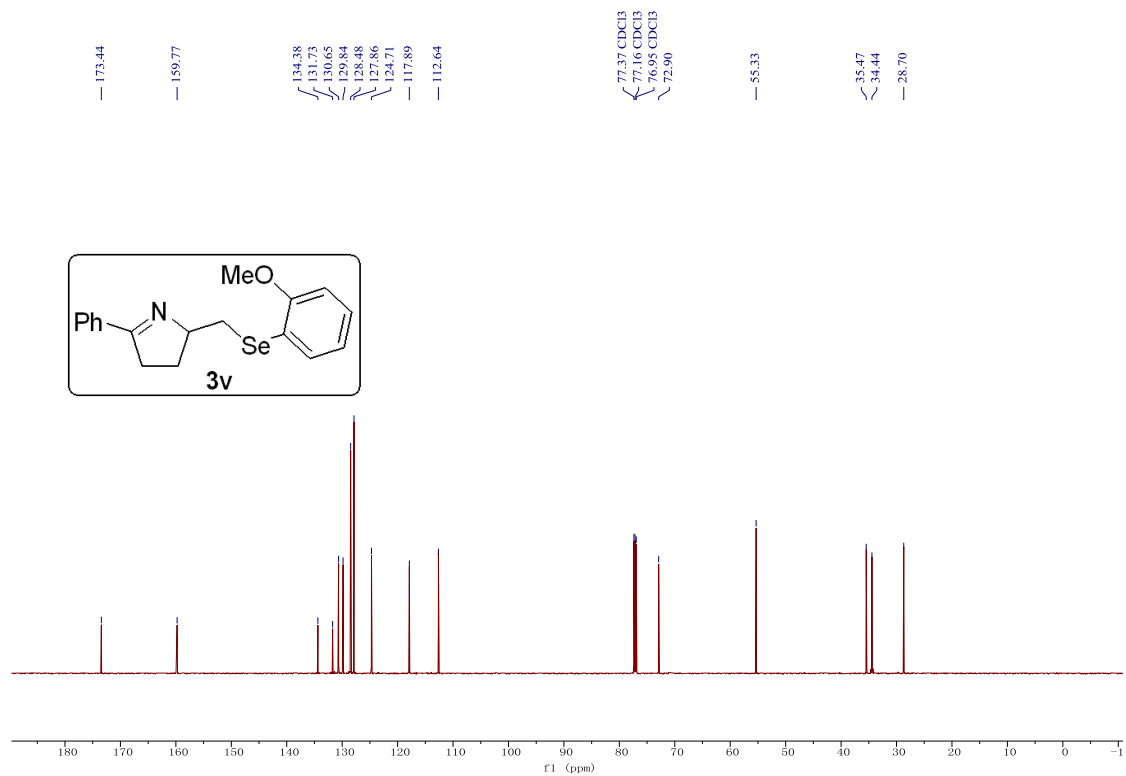

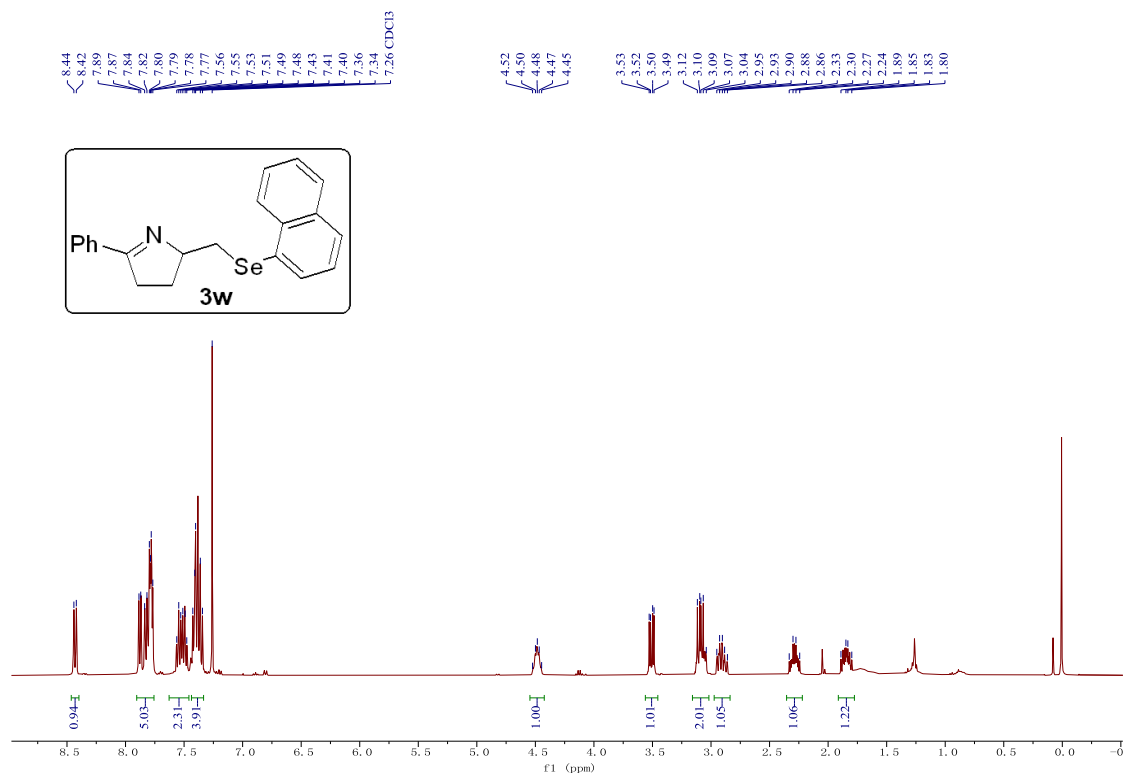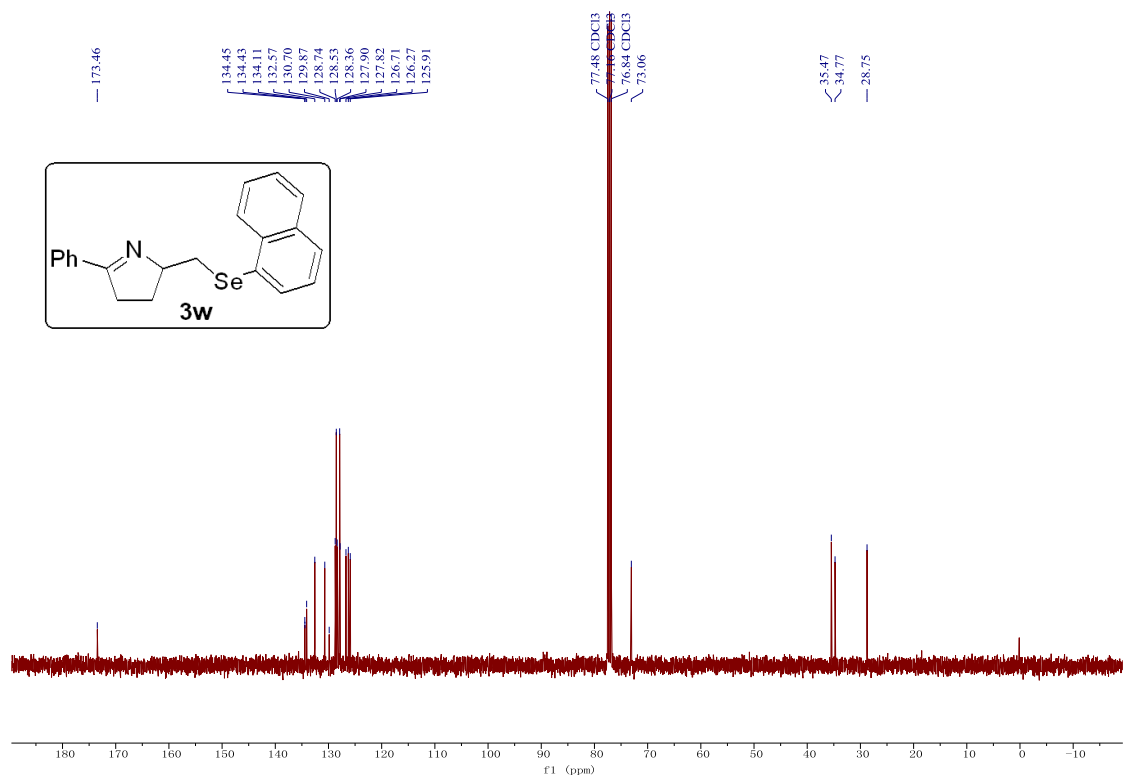



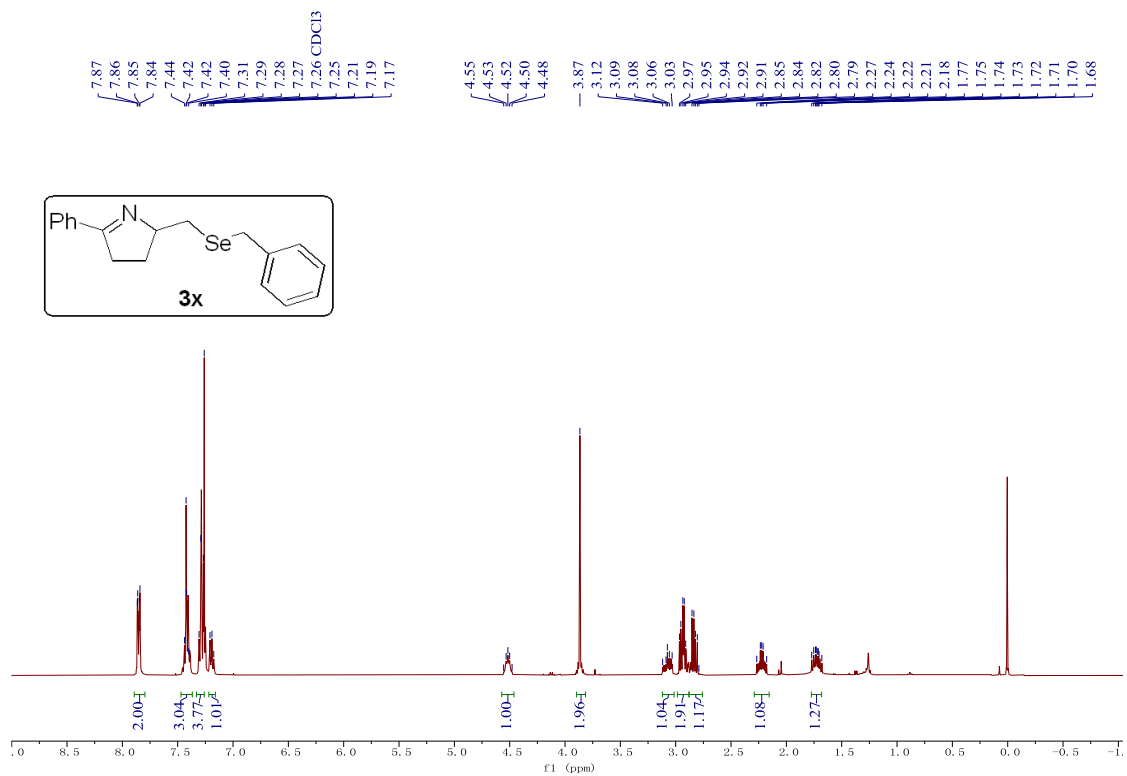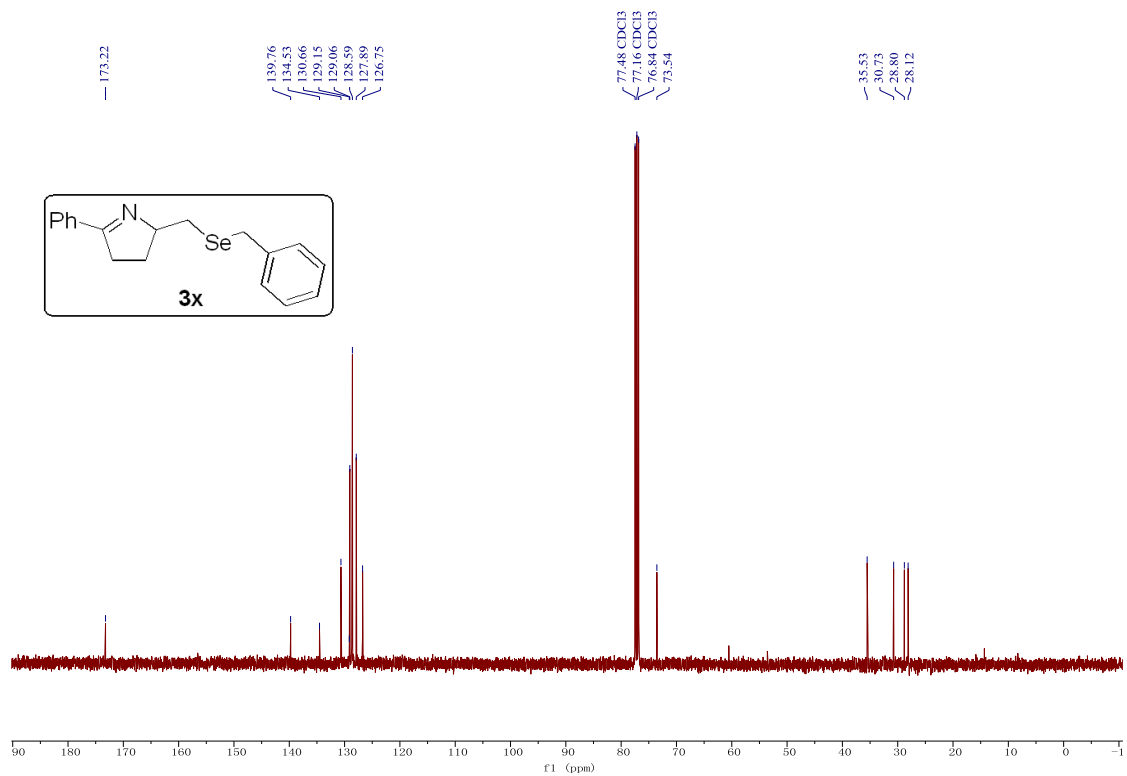

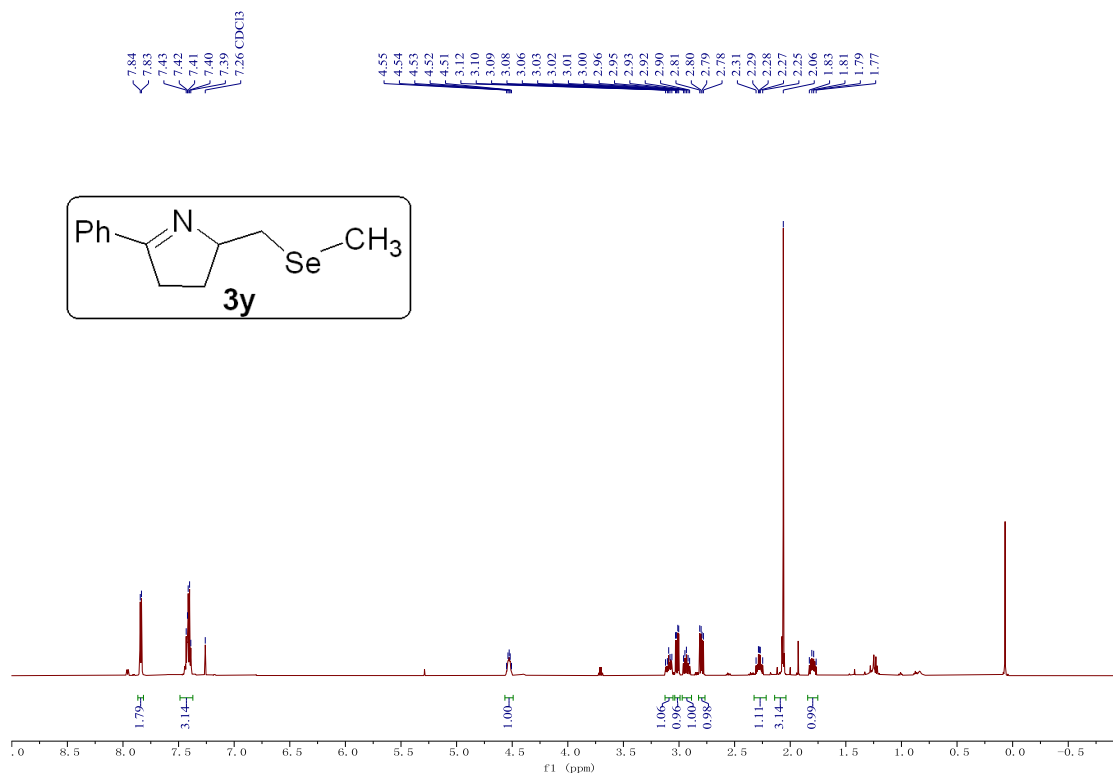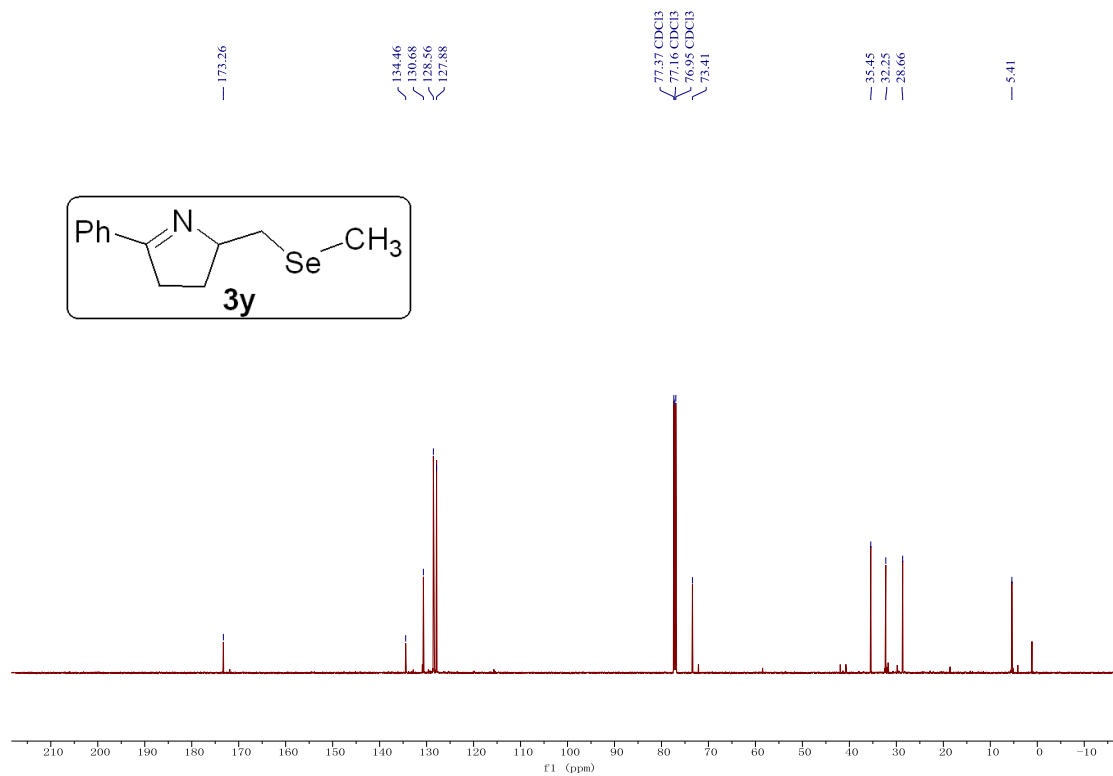

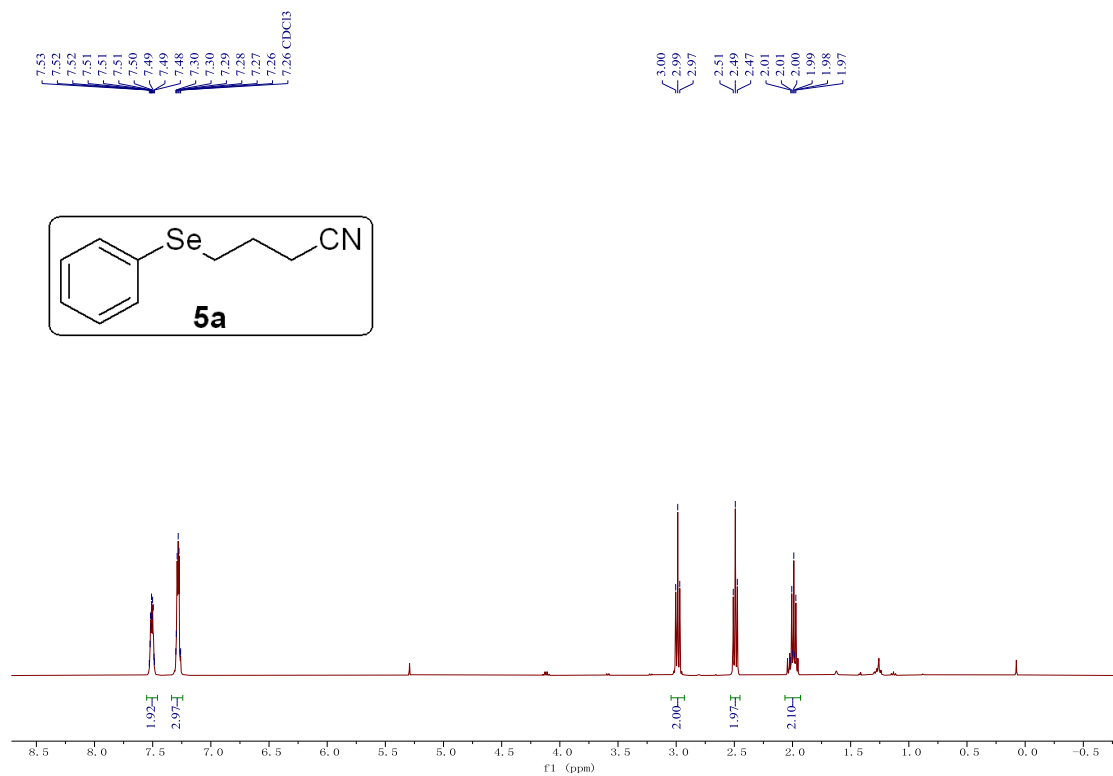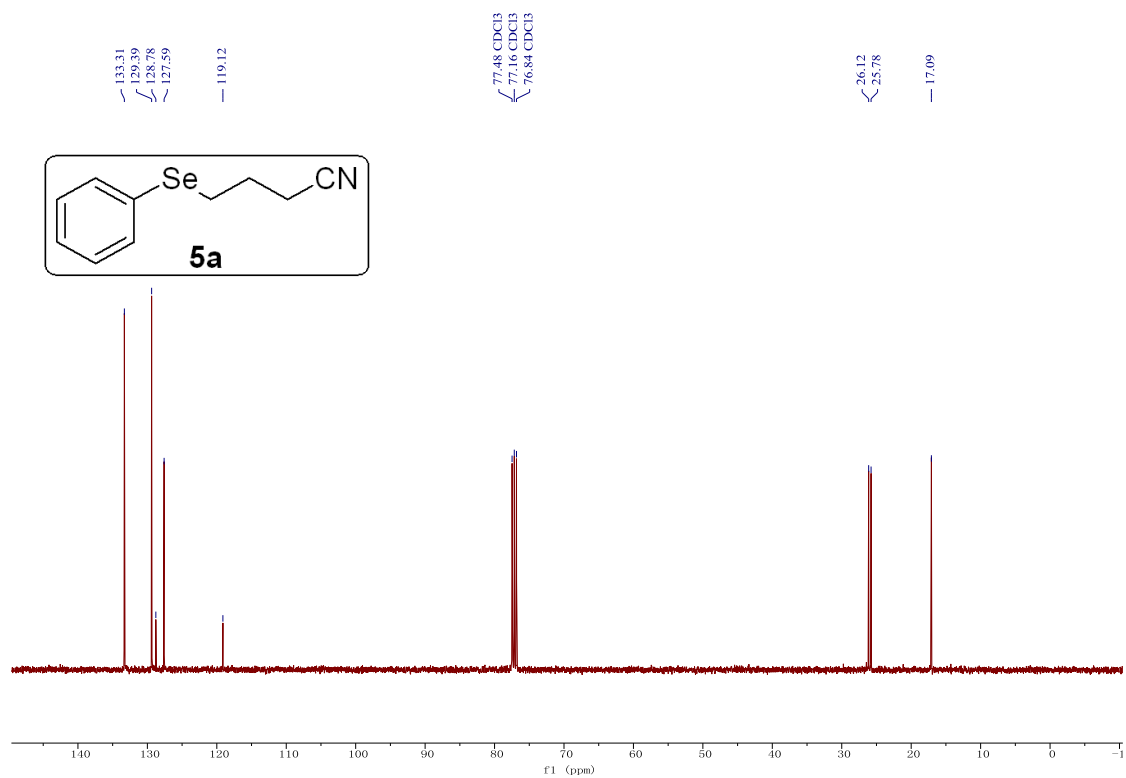

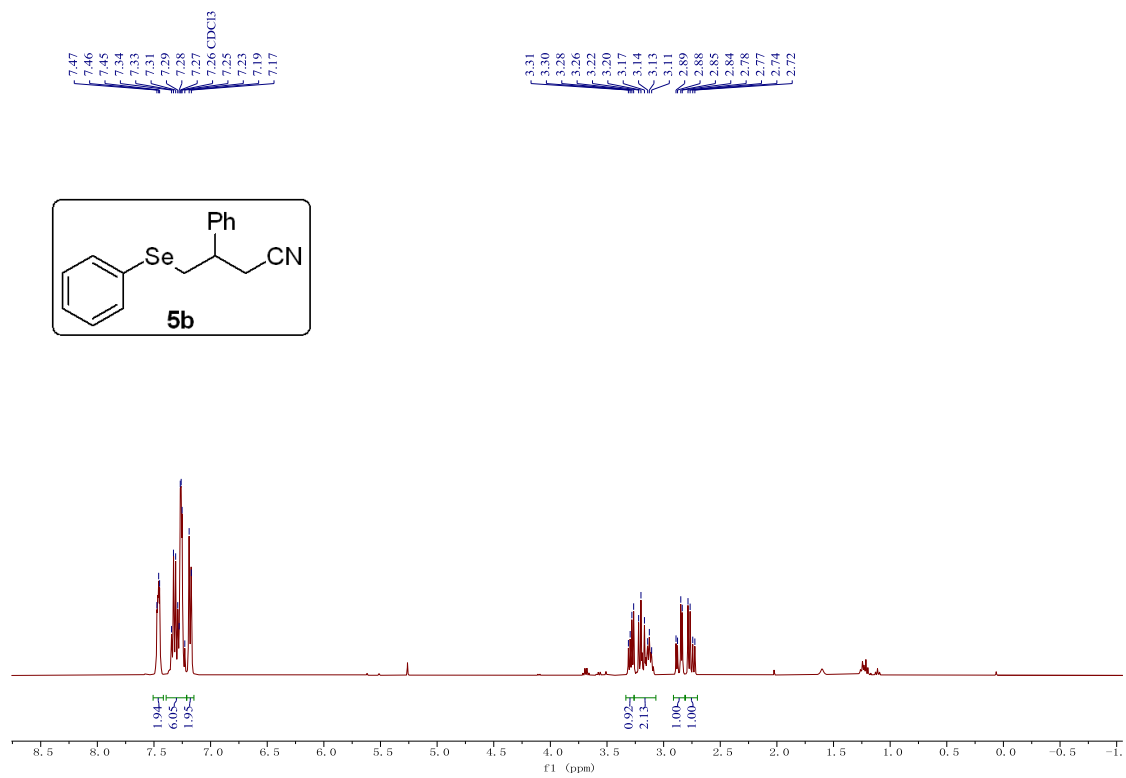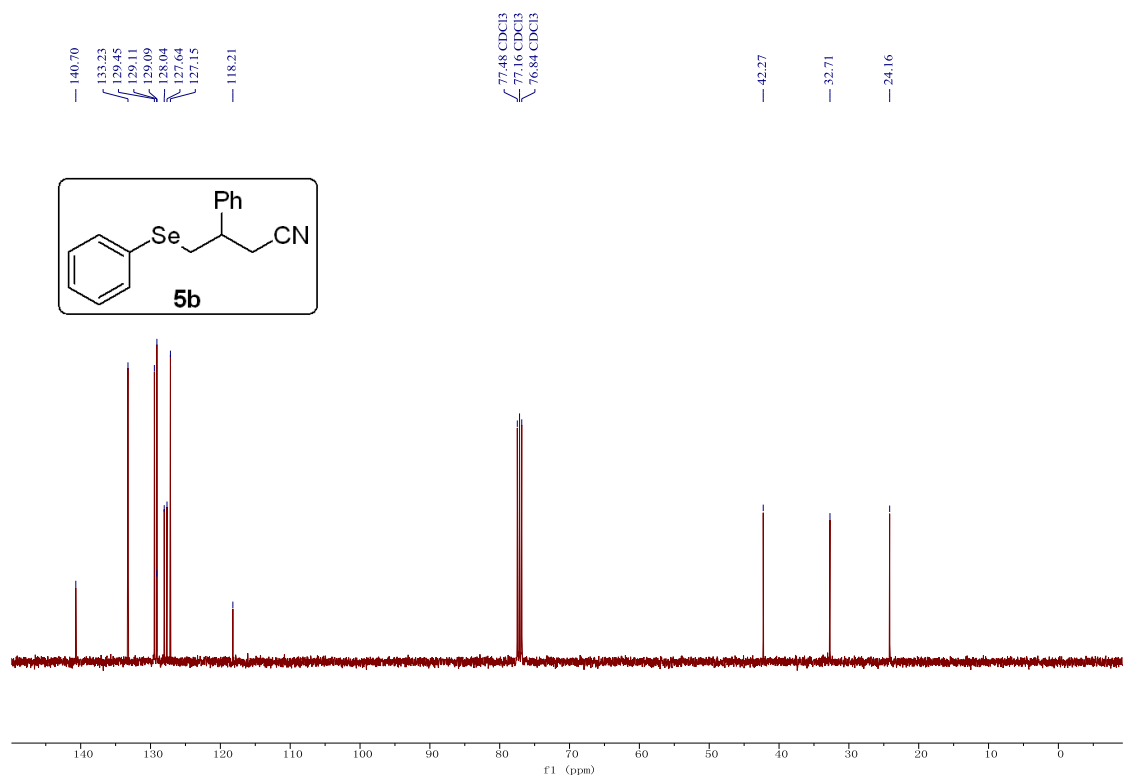

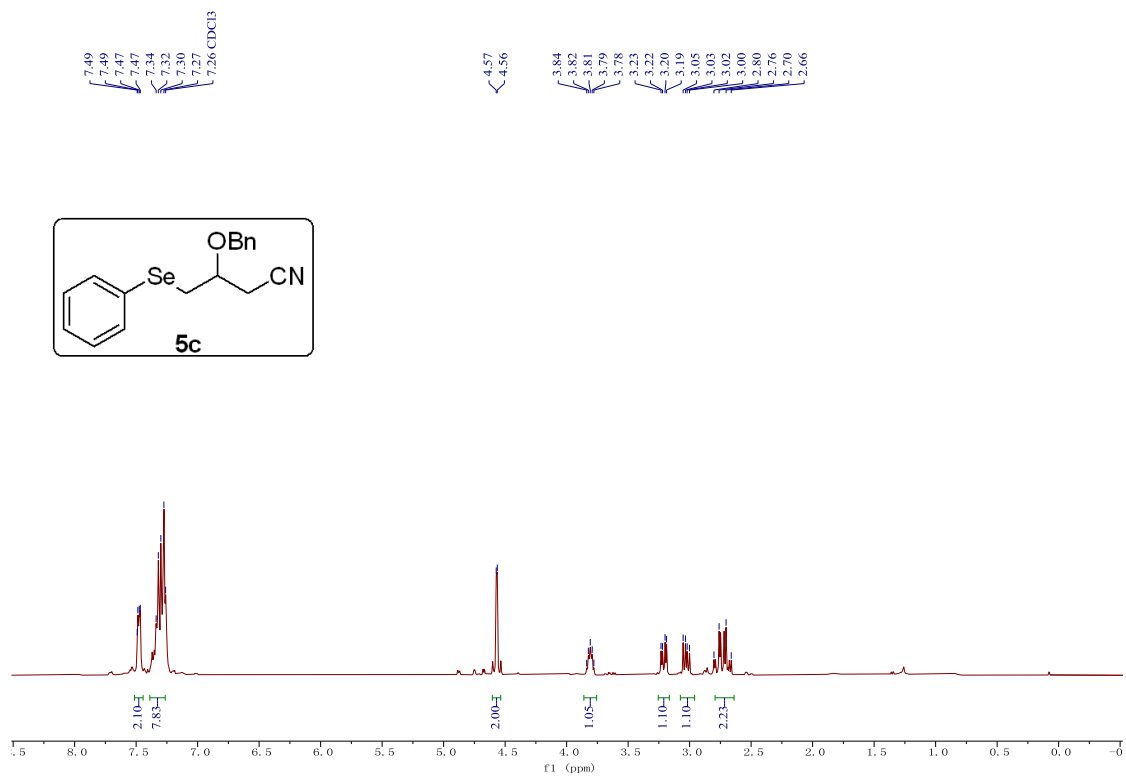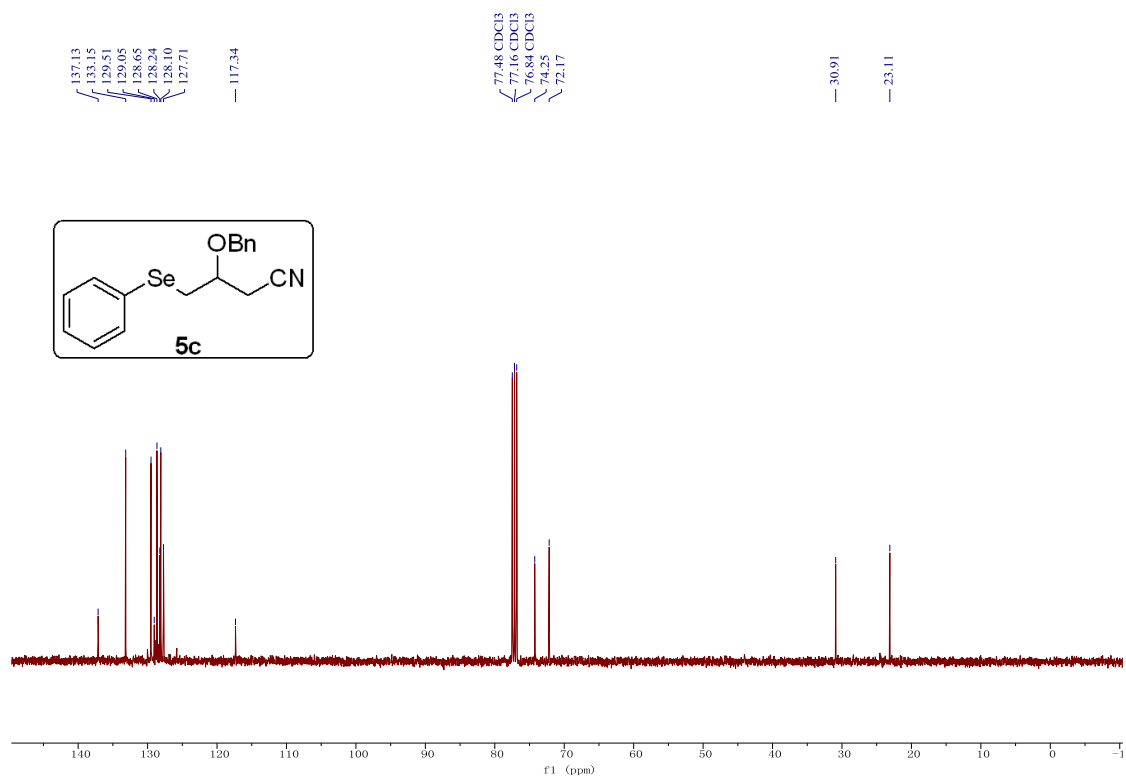

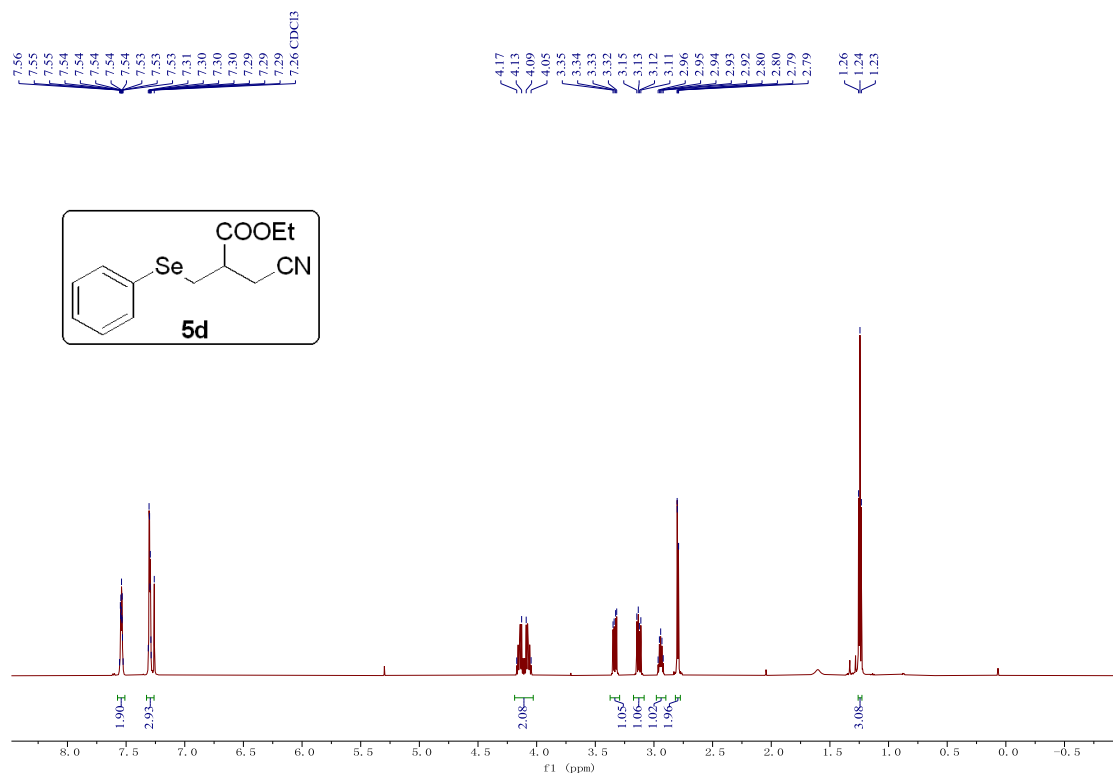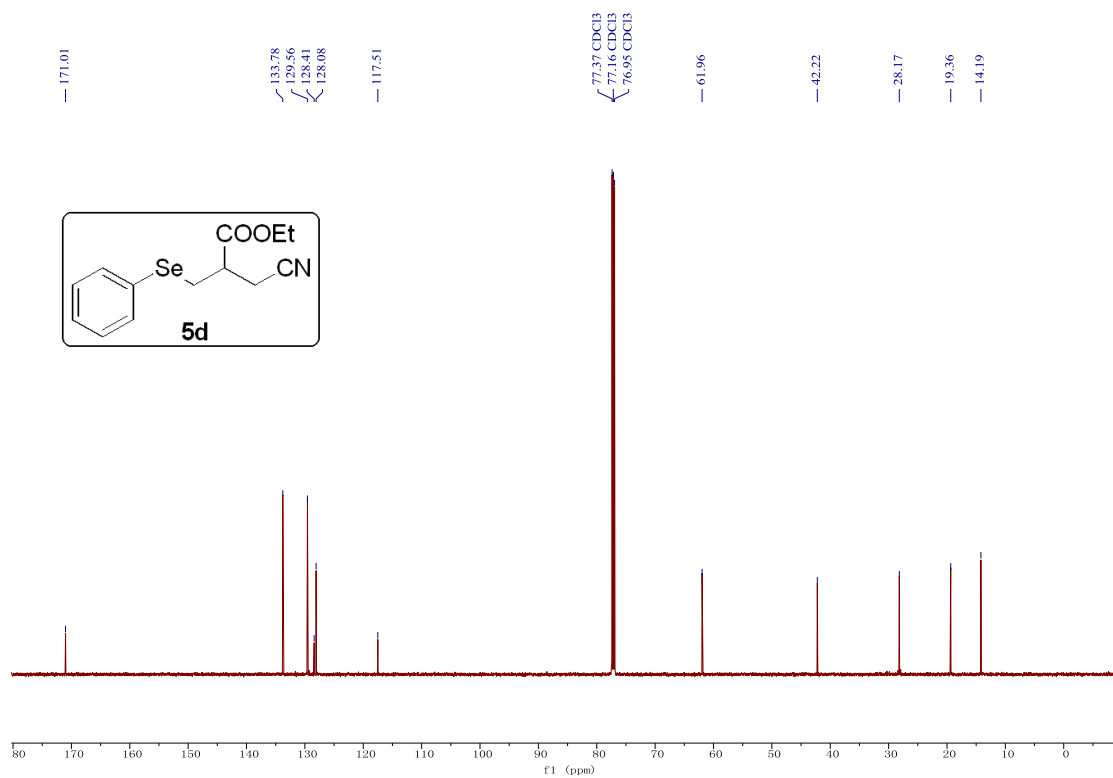

7.48  
7.47  
7.46  
7.36 CDCl<sub>3</sub>  
7.34  
7.33  
7.31  
7.19  
7.17

3.26  
3.24  
3.22  
3.21  
3.19  
3.17  
2.48  
2.46  
2.45  
2.44  
2.43  
1.83  
1.82  
1.80  
1.37  
1.35

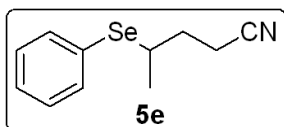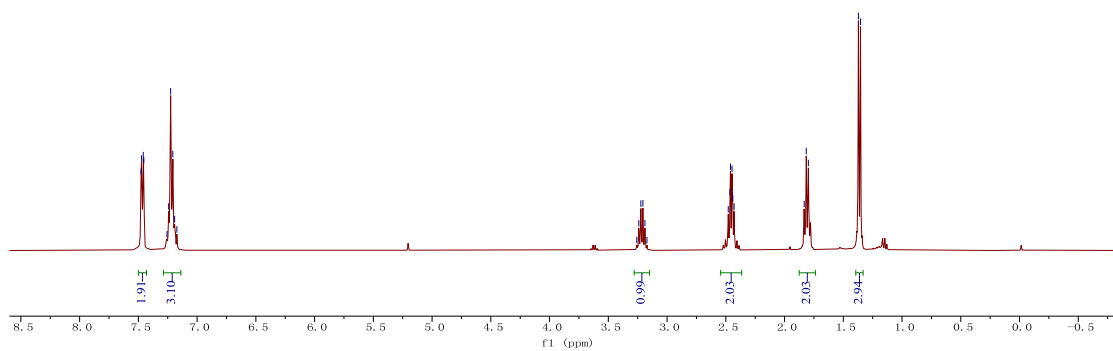

135.62  
129.27  
128.24  
127.57  
119.37

77.48 CDCl<sub>3</sub>  
77.16 CDCl<sub>3</sub>  
76.84 CDCl<sub>3</sub>

37.92  
32.96  
21.97  
15.94

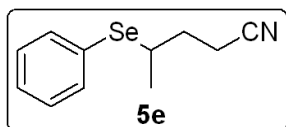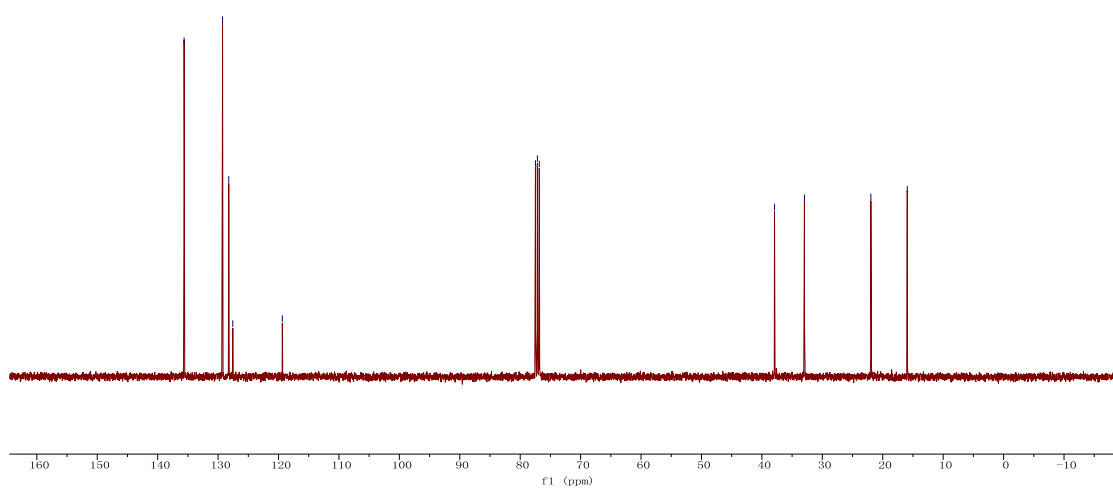

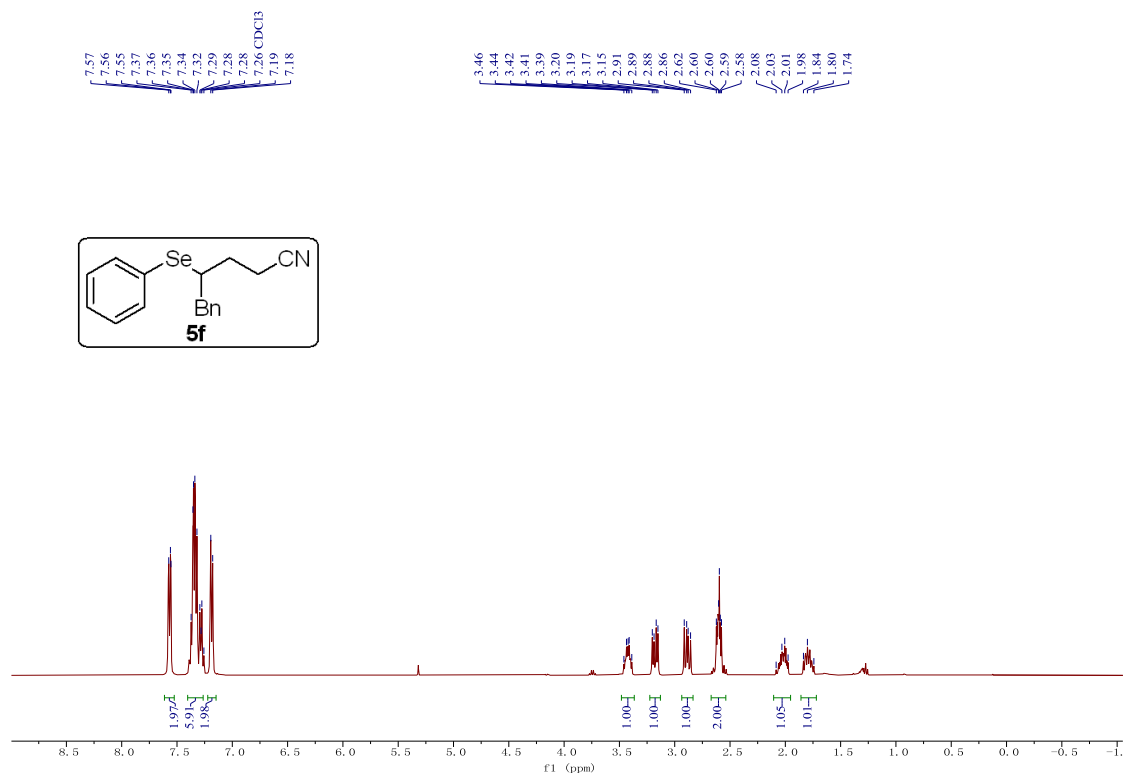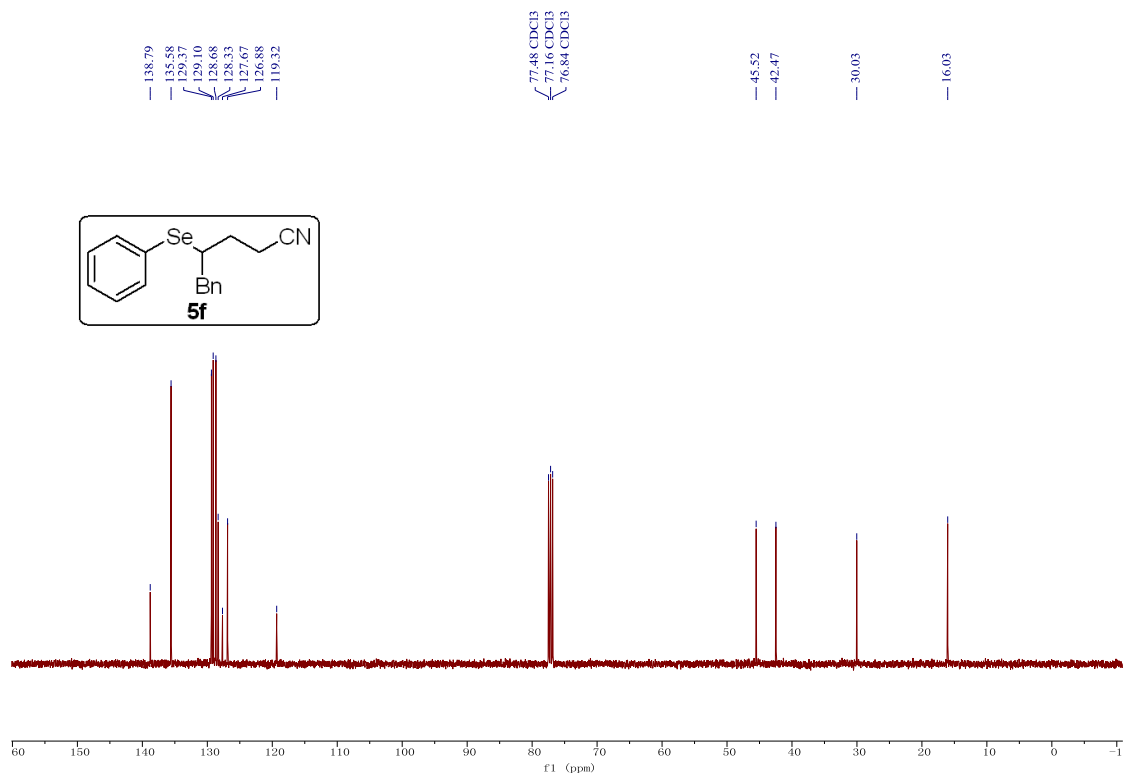



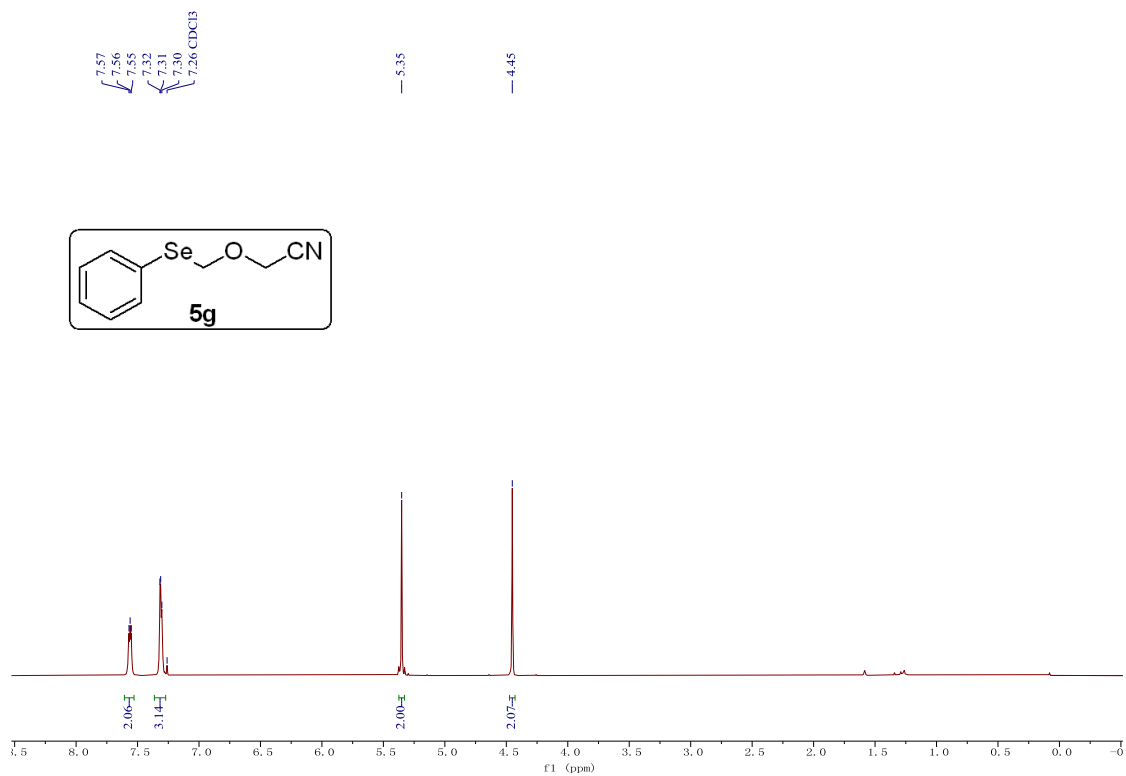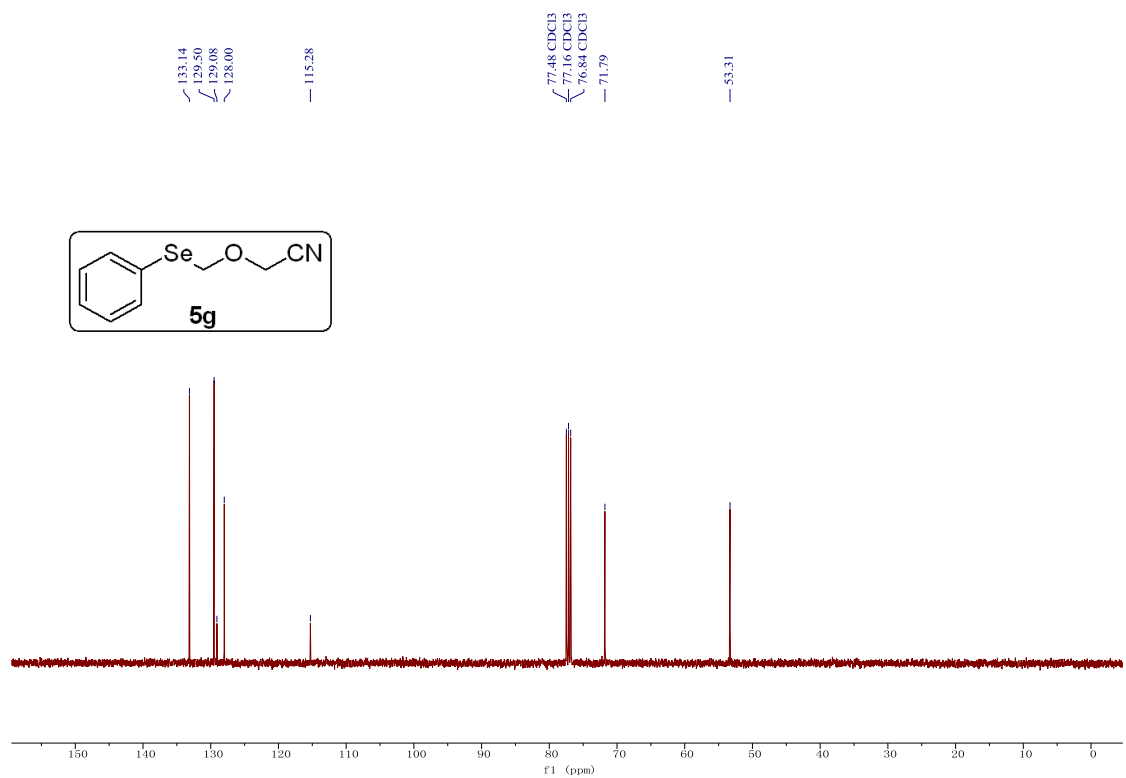

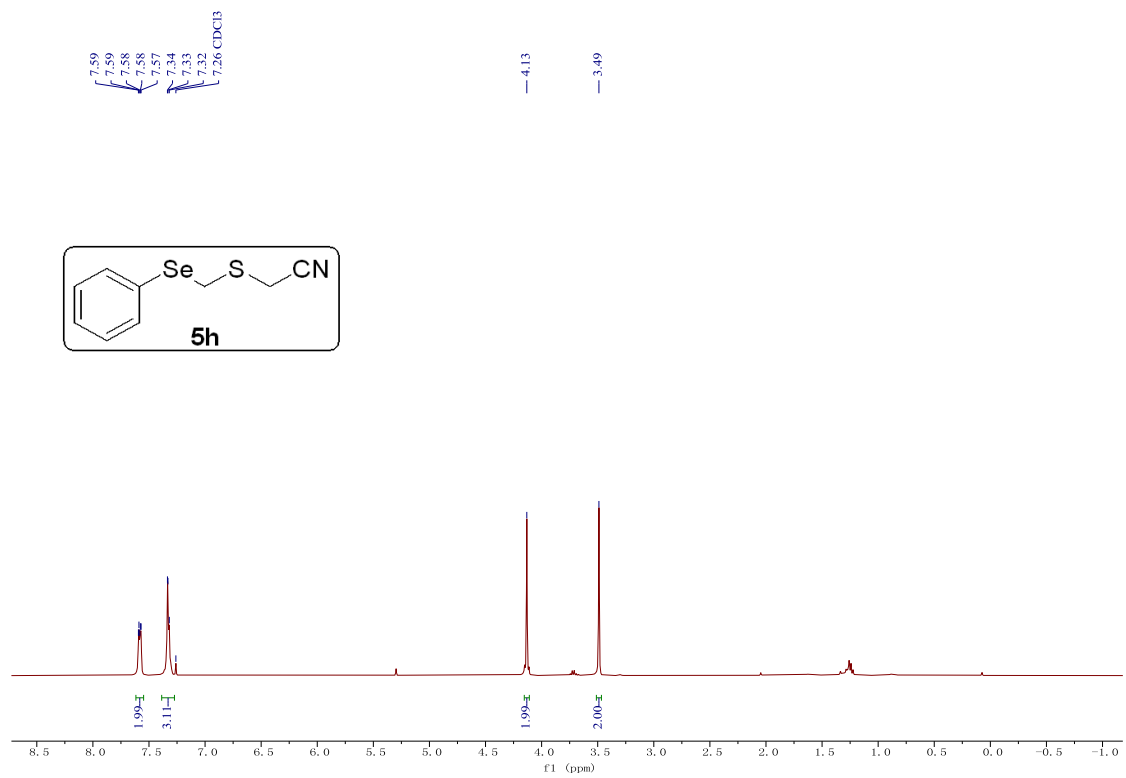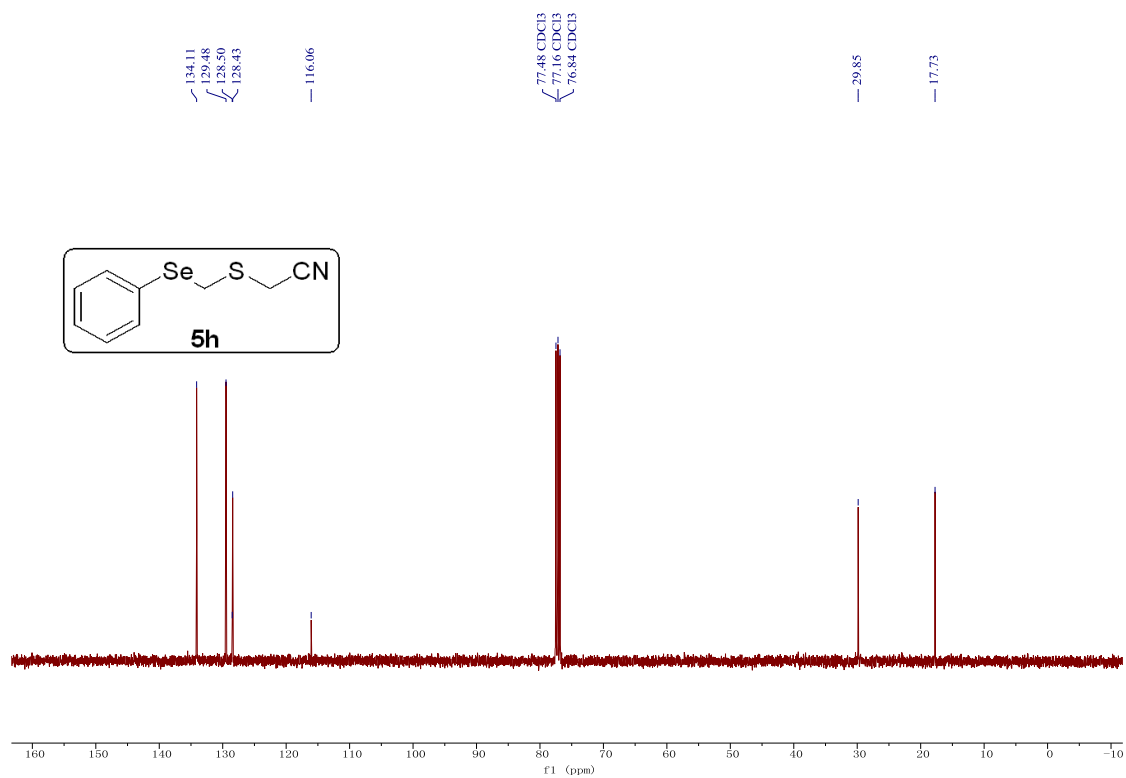

7.56  
7.55  
7.54  
7.51  
7.30  
7.28  
7.27  
7.26 CDCl<sub>3</sub>

3.30  
3.28  
3.26  
3.25  
3.23  
3.21

2.35  
2.33  
2.32  
1.86  
1.84  
1.83  
1.81  
1.79  
1.78  
1.75  
1.73  
1.72  
1.71  
1.71  
1.44  
1.43

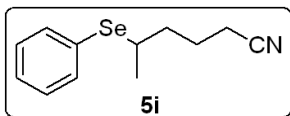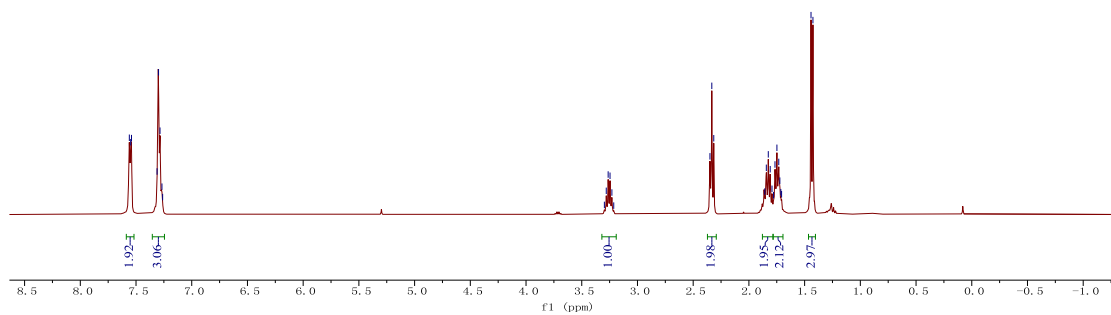

135.30  
129.11  
128.53  
127.84  
119.53

77.48 CDCl<sub>3</sub>  
77.16 CDCl<sub>3</sub>  
76.84 CDCl<sub>3</sub>

38.63  
36.43  
23.76  
22.34  
17.01

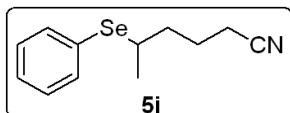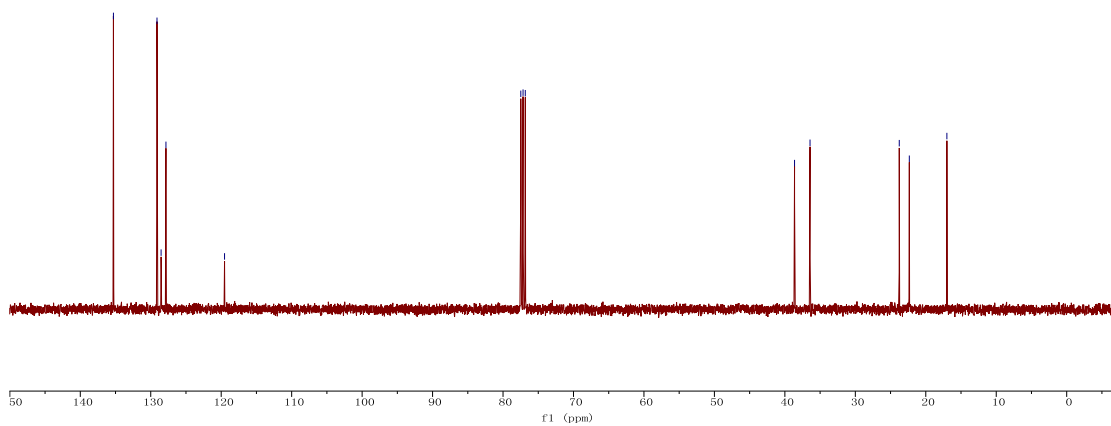

7.52  
7.50  
7.50  
7.39  
7.39  
7.37  
7.35  
7.33  
7.31  
7.29  
7.27  
7.26 CDCl<sub>3</sub>  
7.26

4.34  
4.33  
4.32  
4.30

2.40  
2.37  
2.36  
2.23  
2.20  
2.18  
2.16  
2.14  
1.76  
1.72  
1.67 H<sub>2</sub>O  
1.61  
1.61  
1.57  
1.54  
1.53

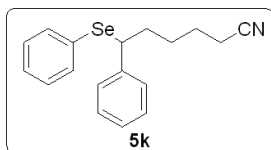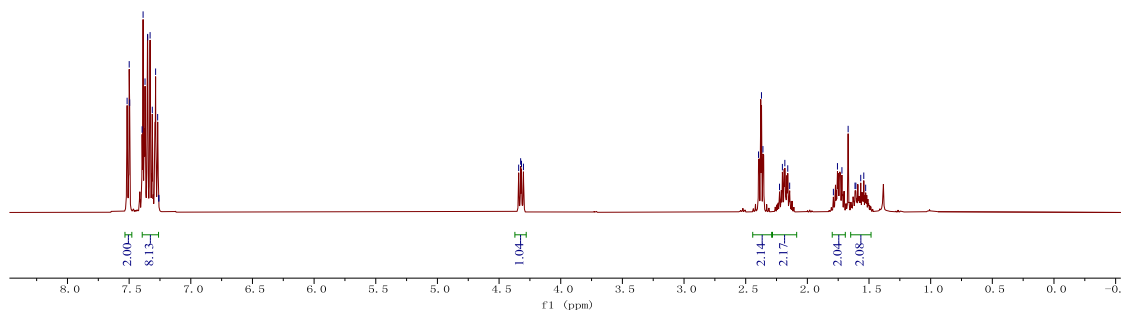

142.00  
135.62  
129.43  
128.98  
128.56  
128.04  
127.74  
127.22  
119.58

77.48 CDCl<sub>3</sub>  
77.16 CDCl<sub>3</sub>  
76.84 CDCl<sub>3</sub>

48.09

35.36

27.62

25.14

17.11

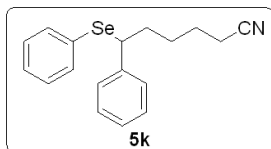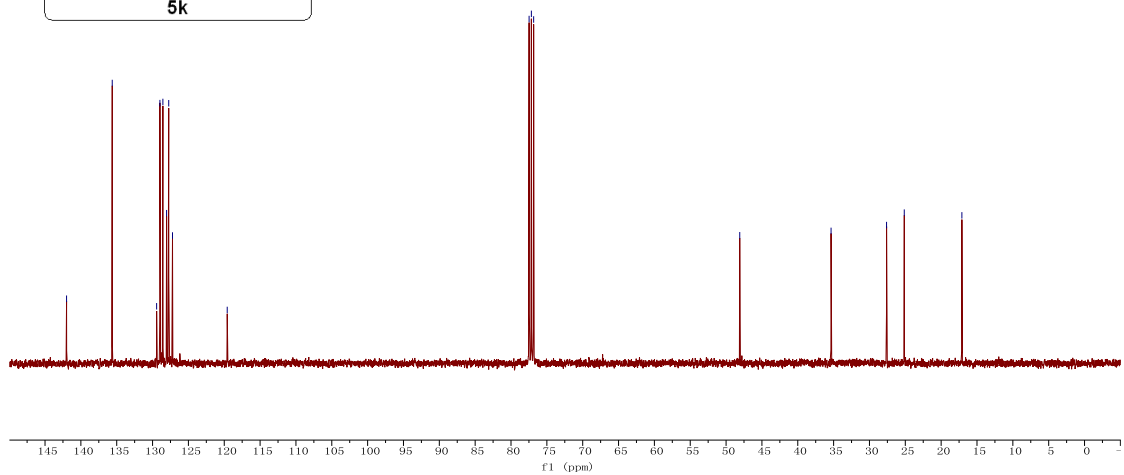

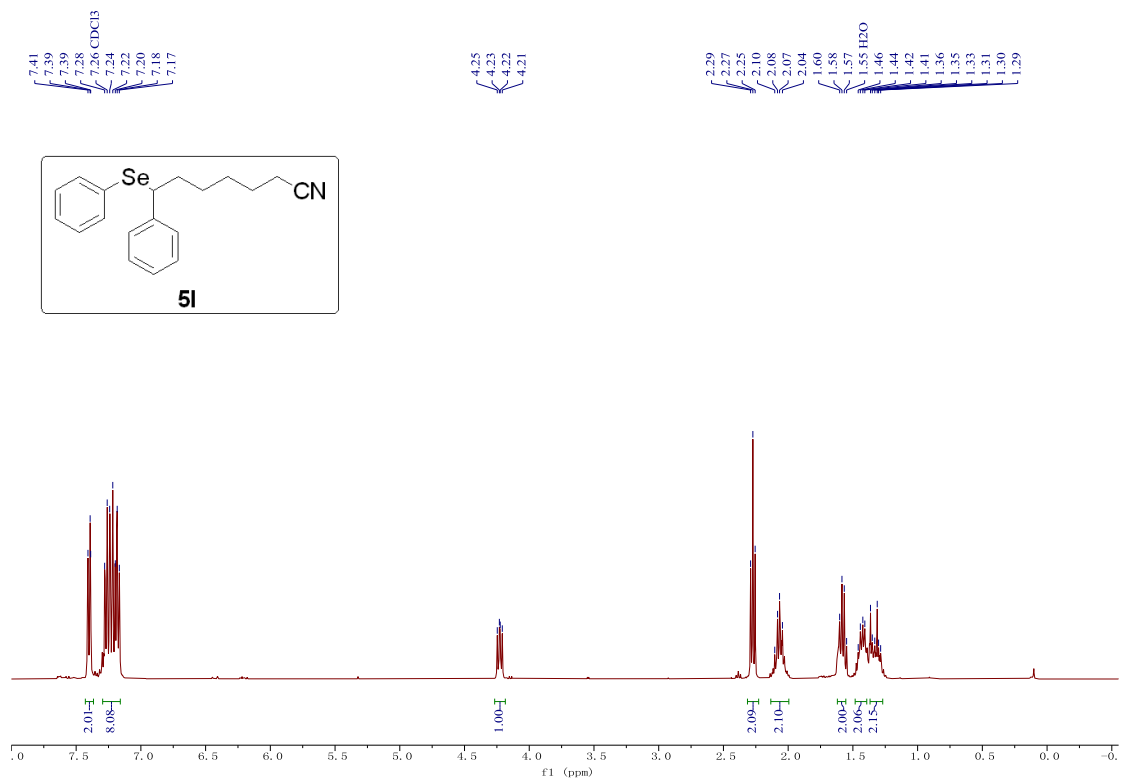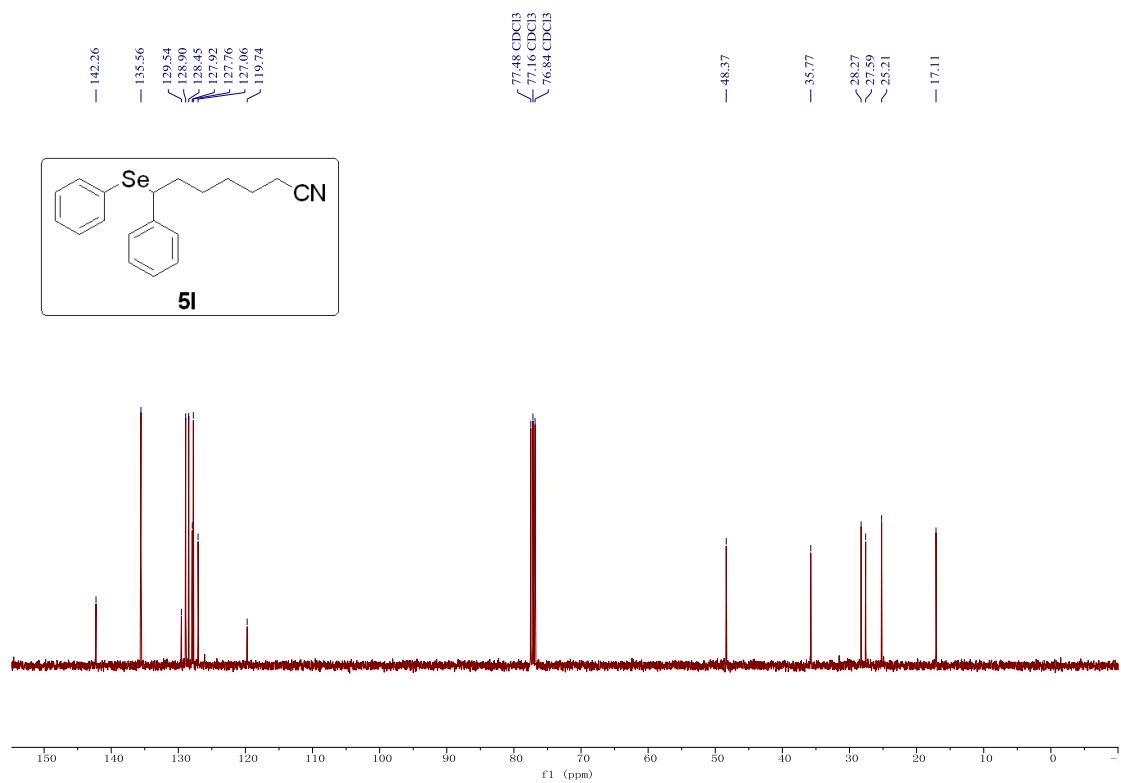

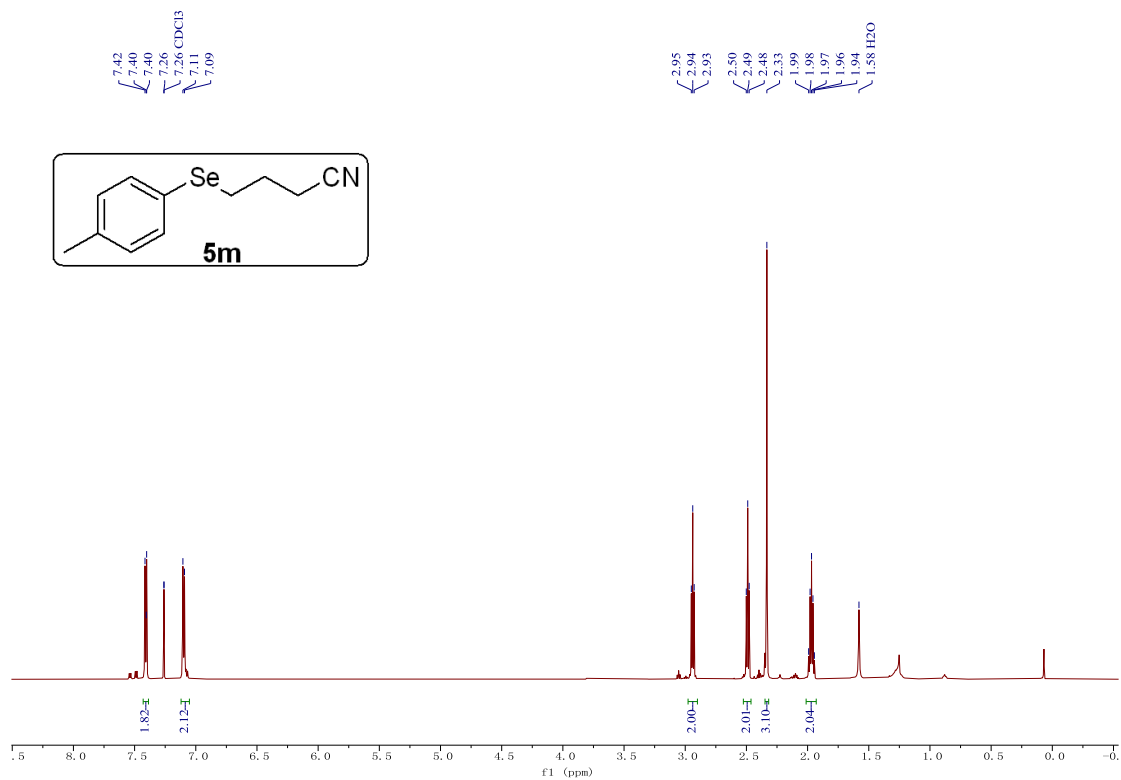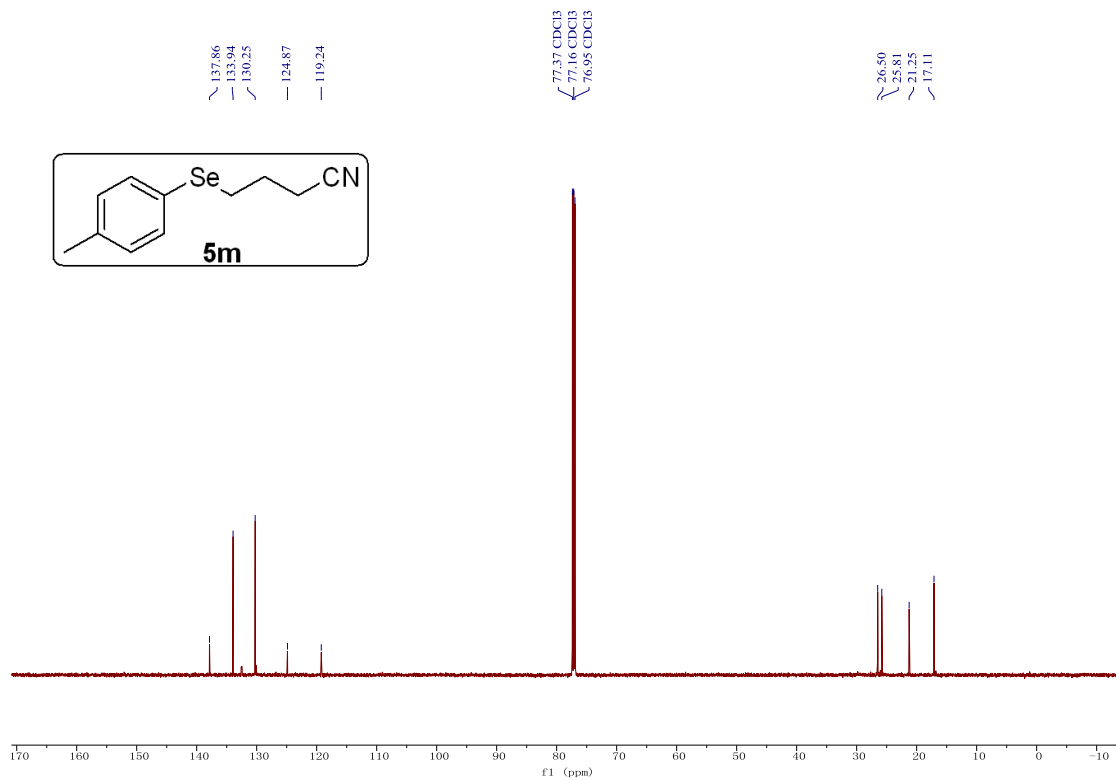

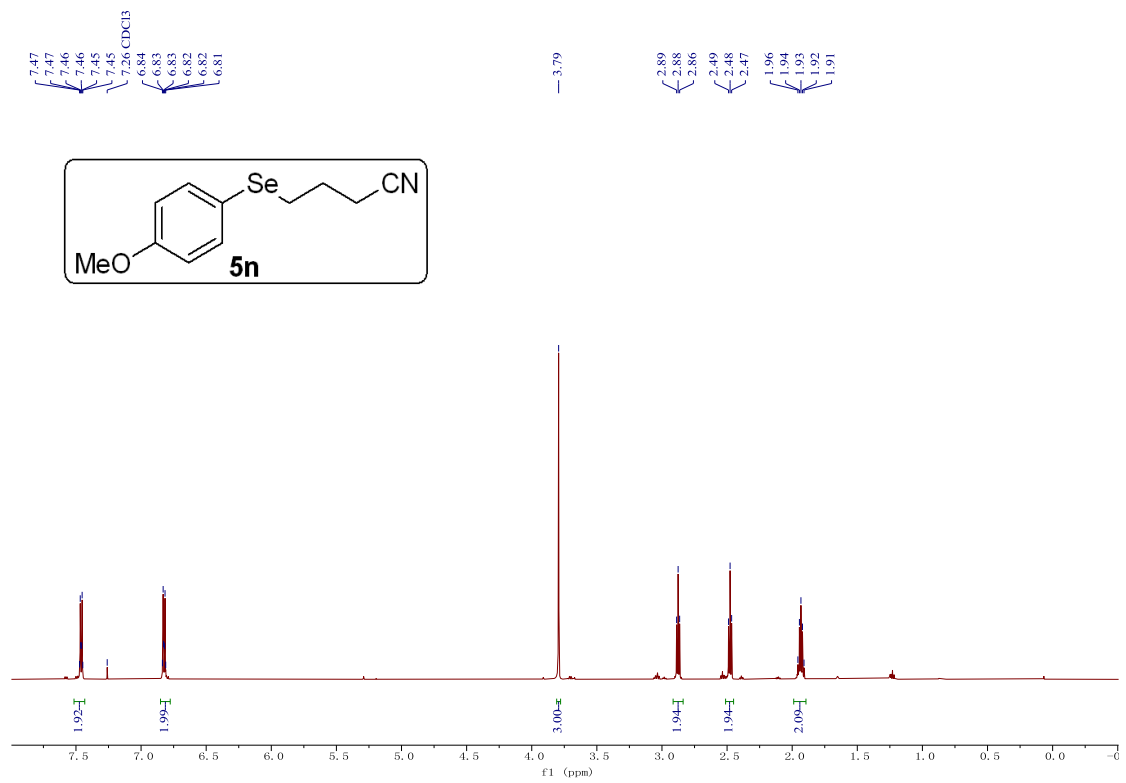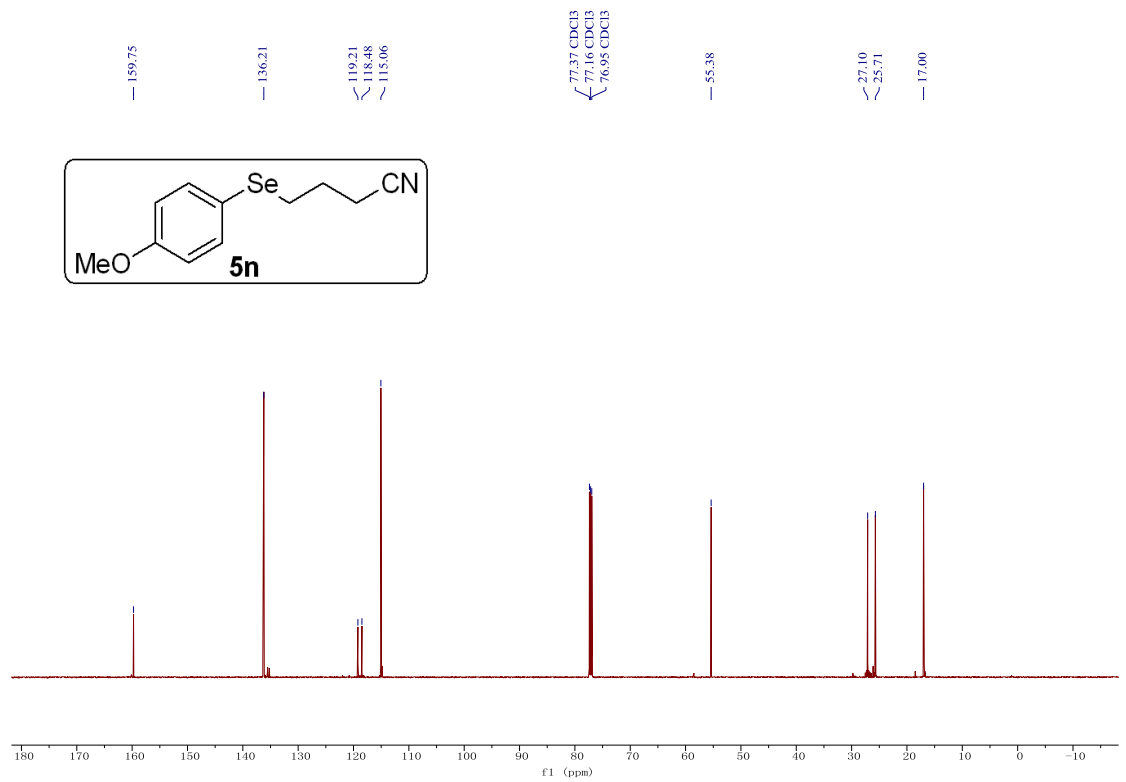

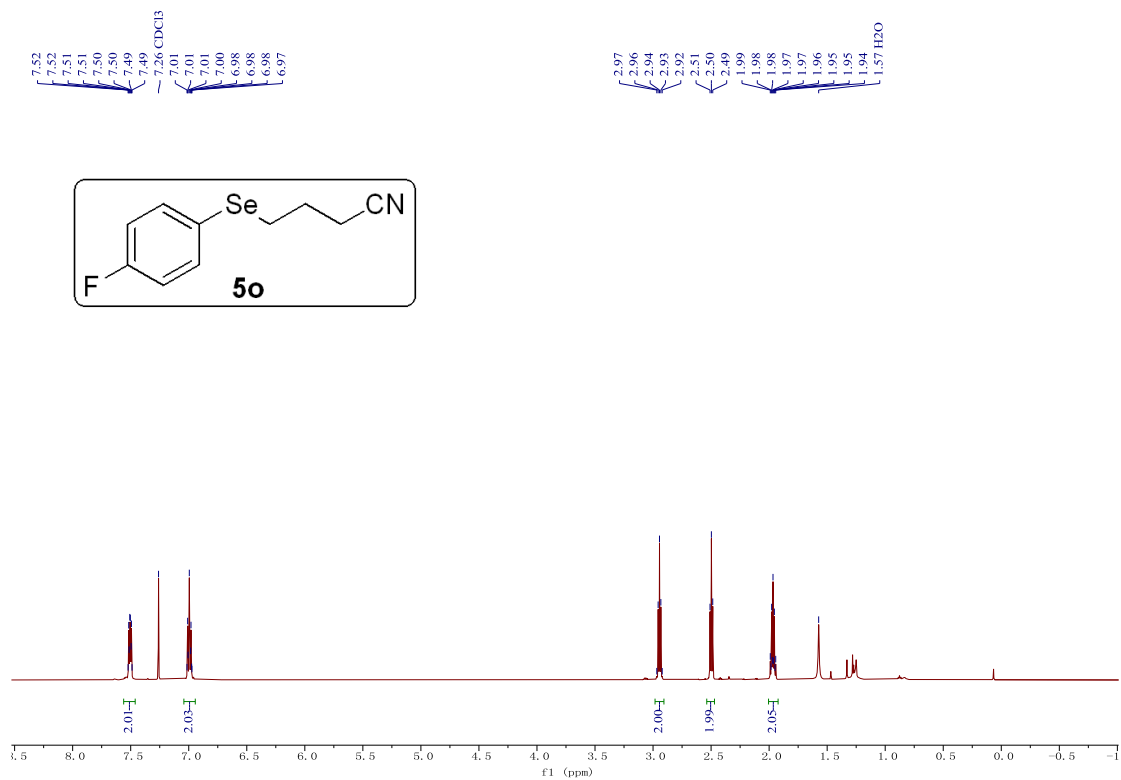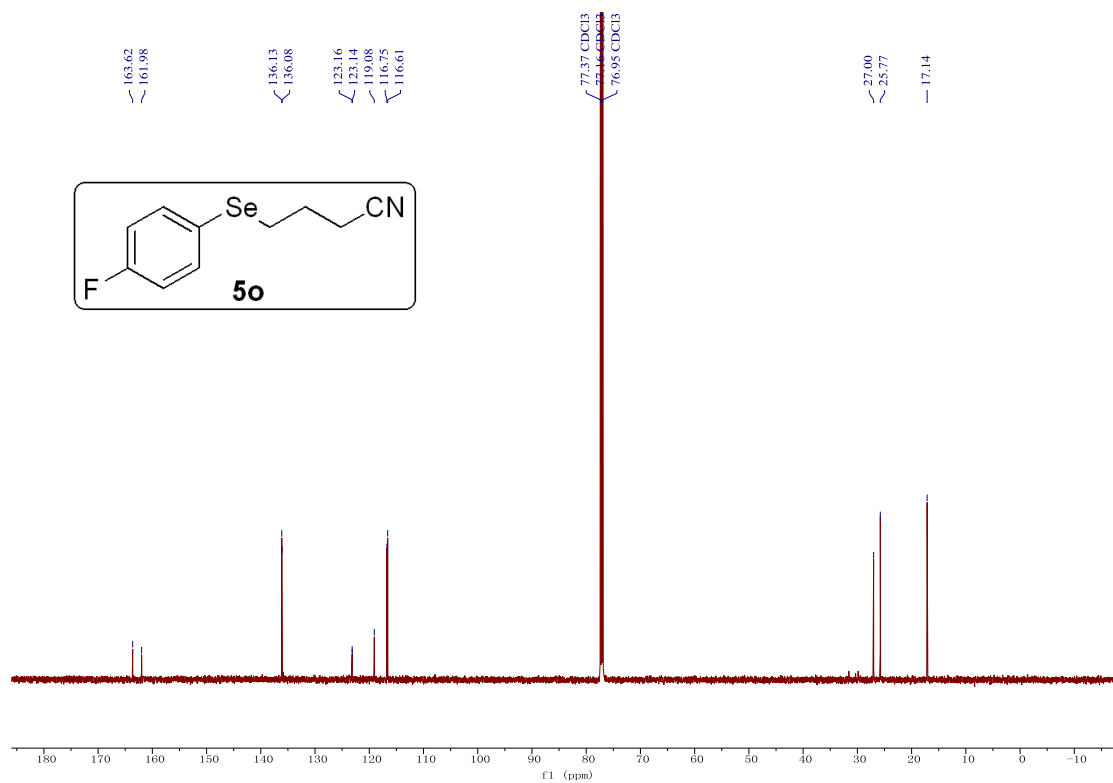



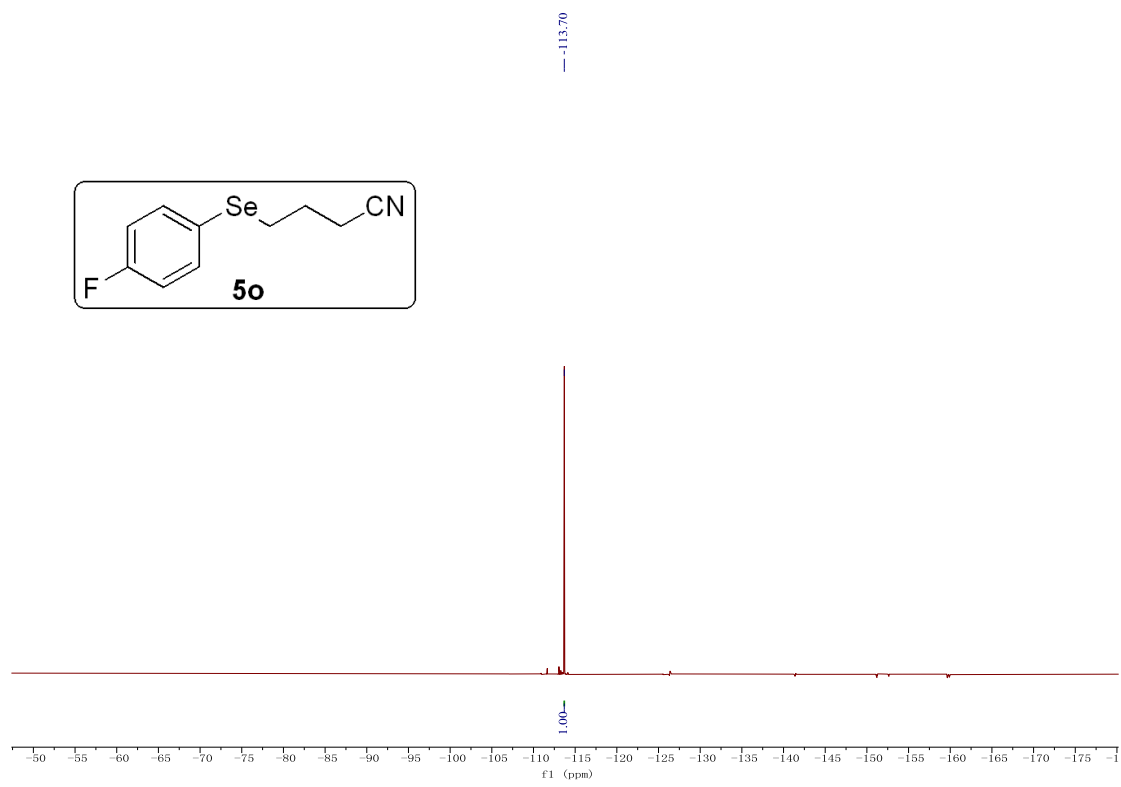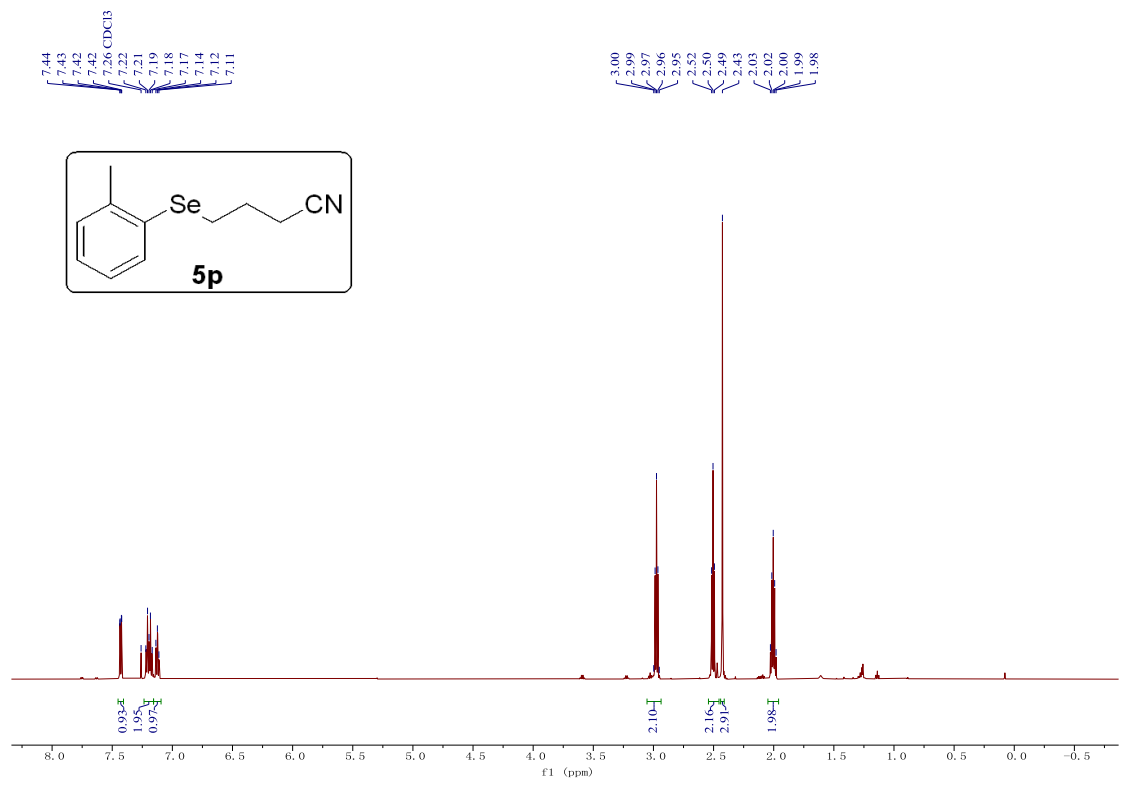

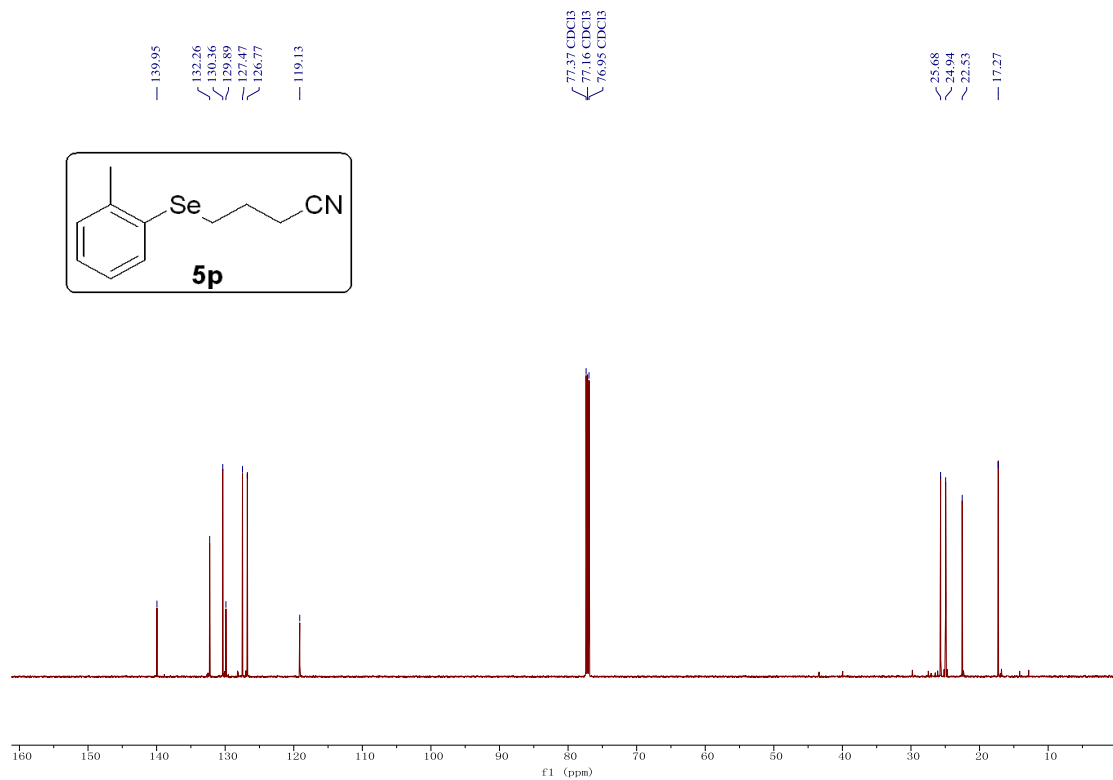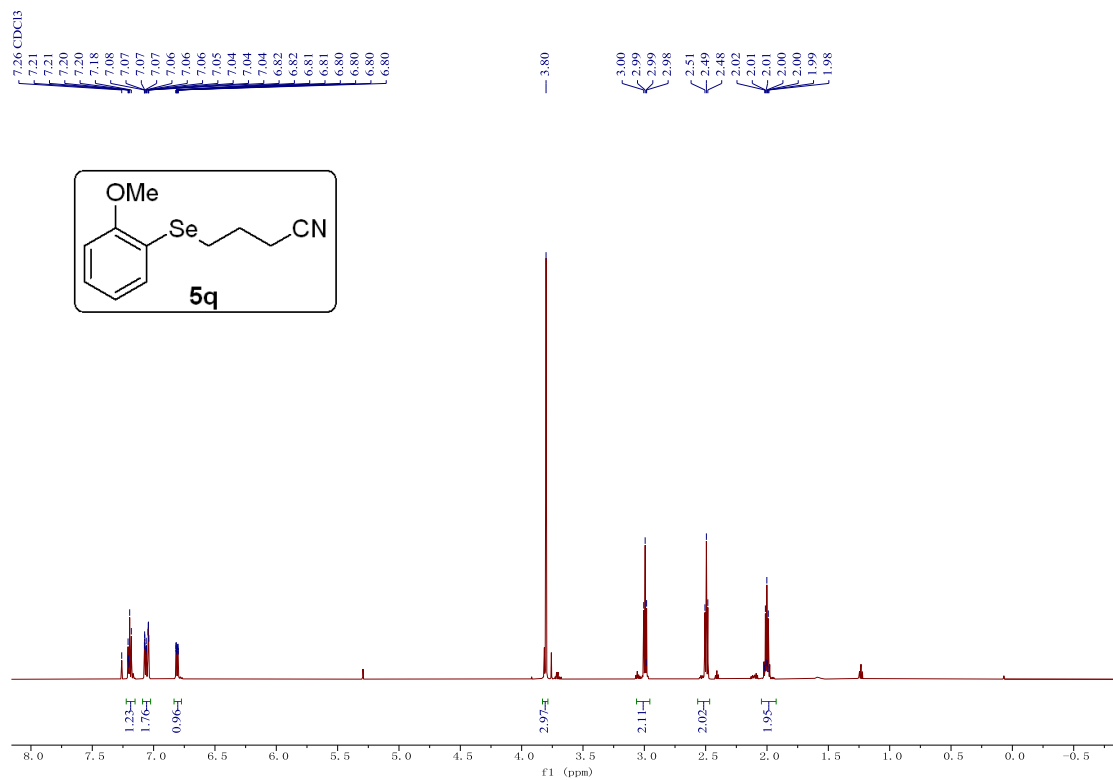

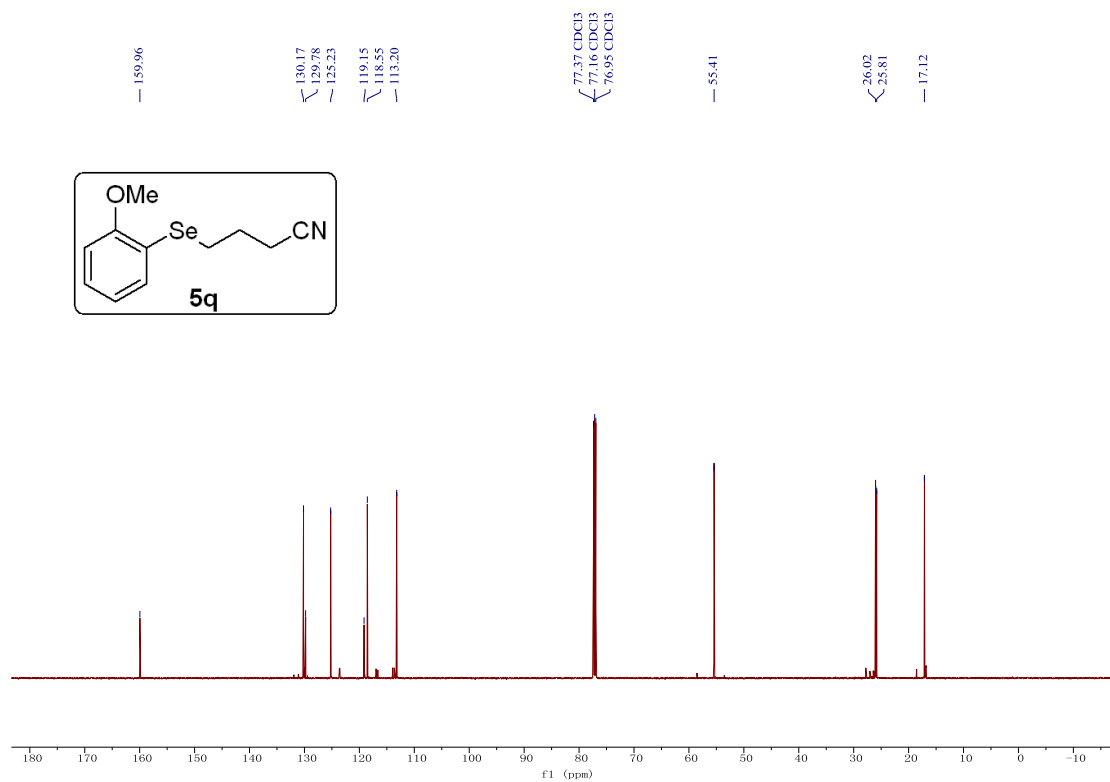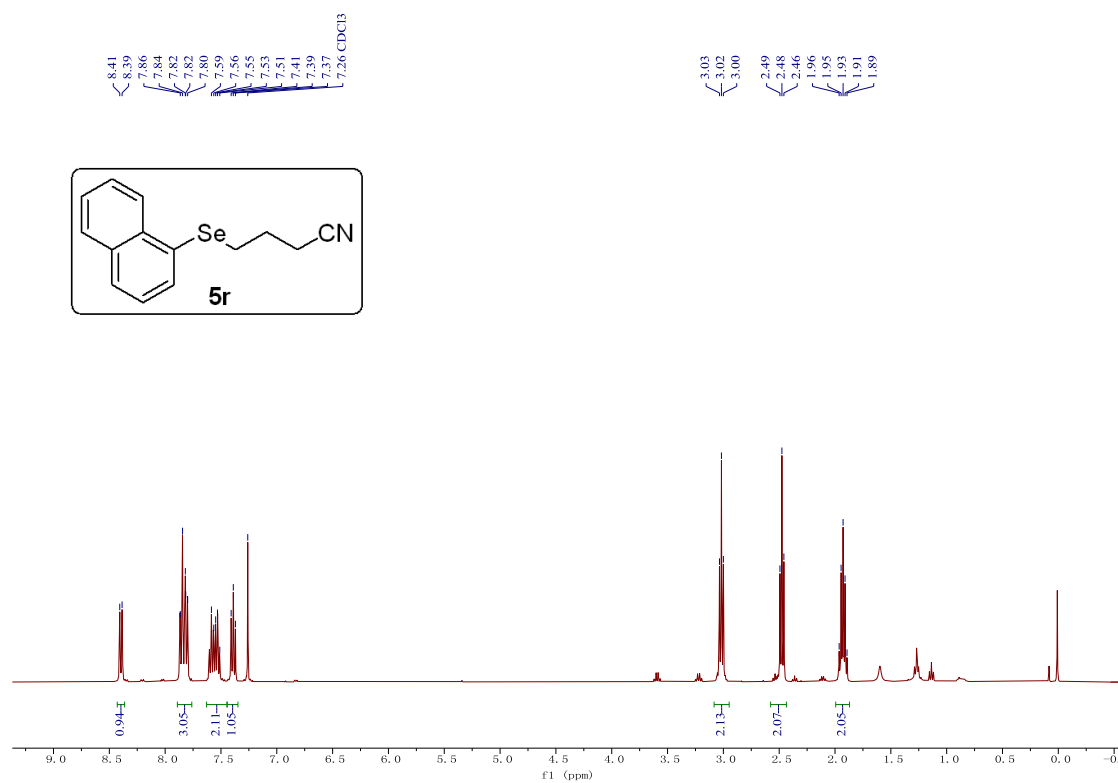

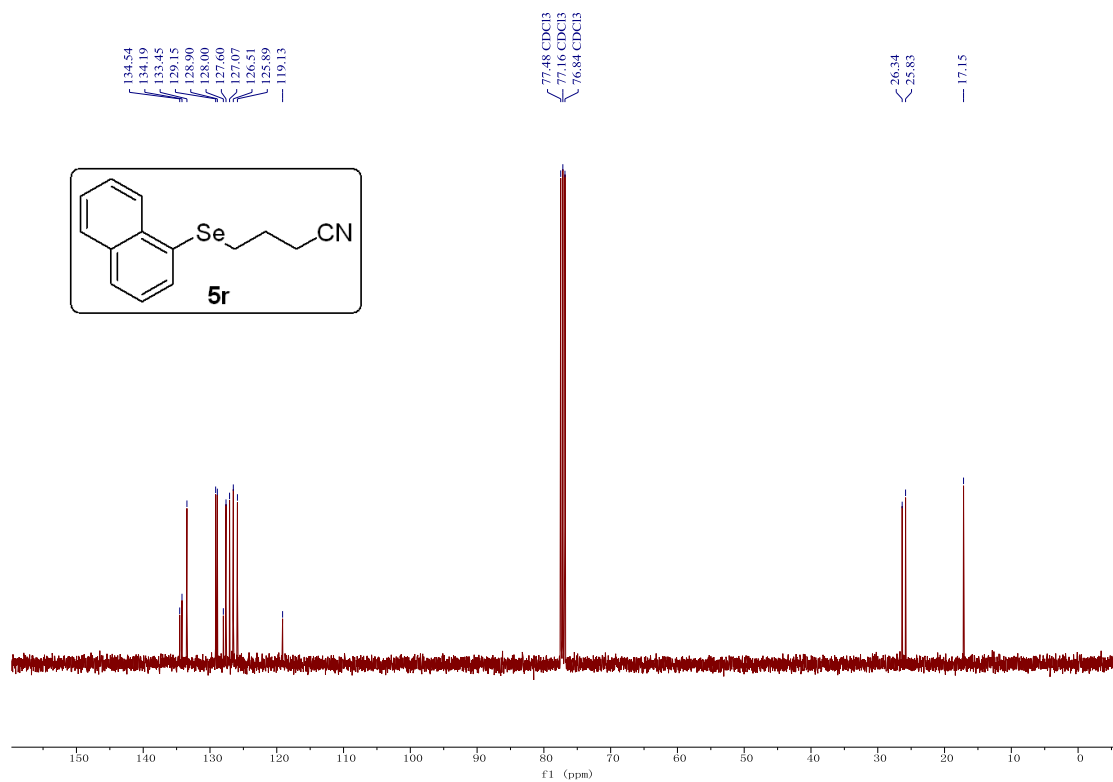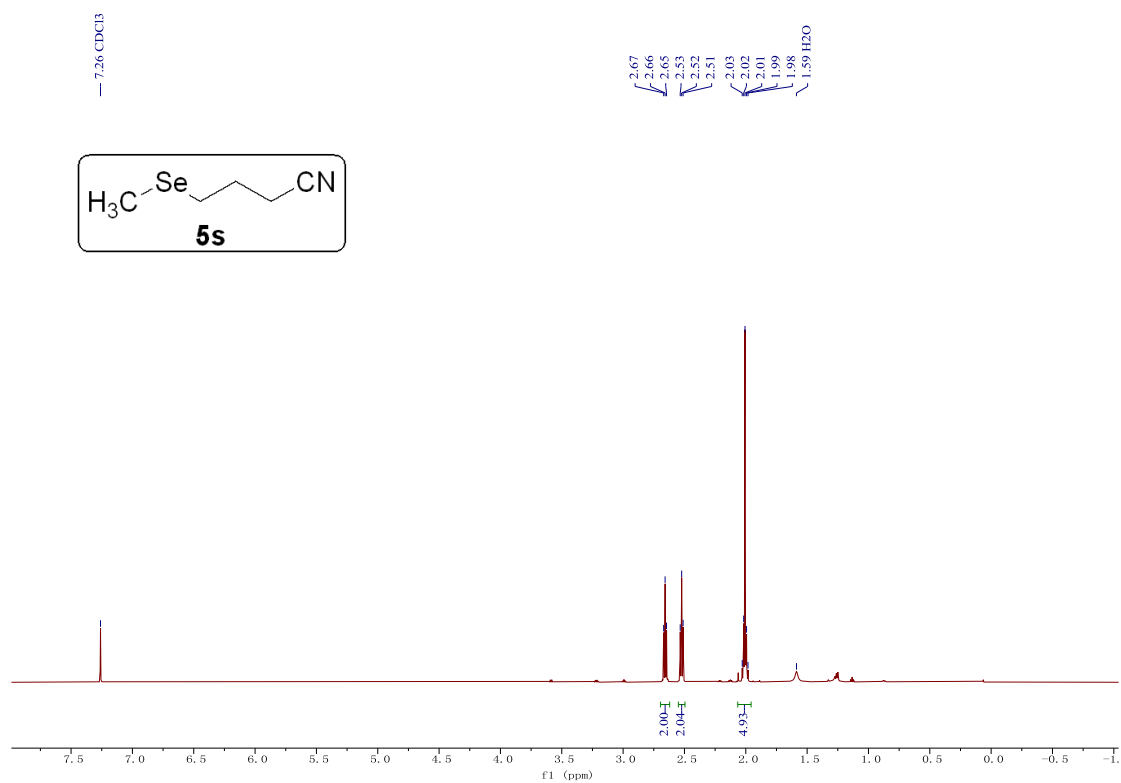

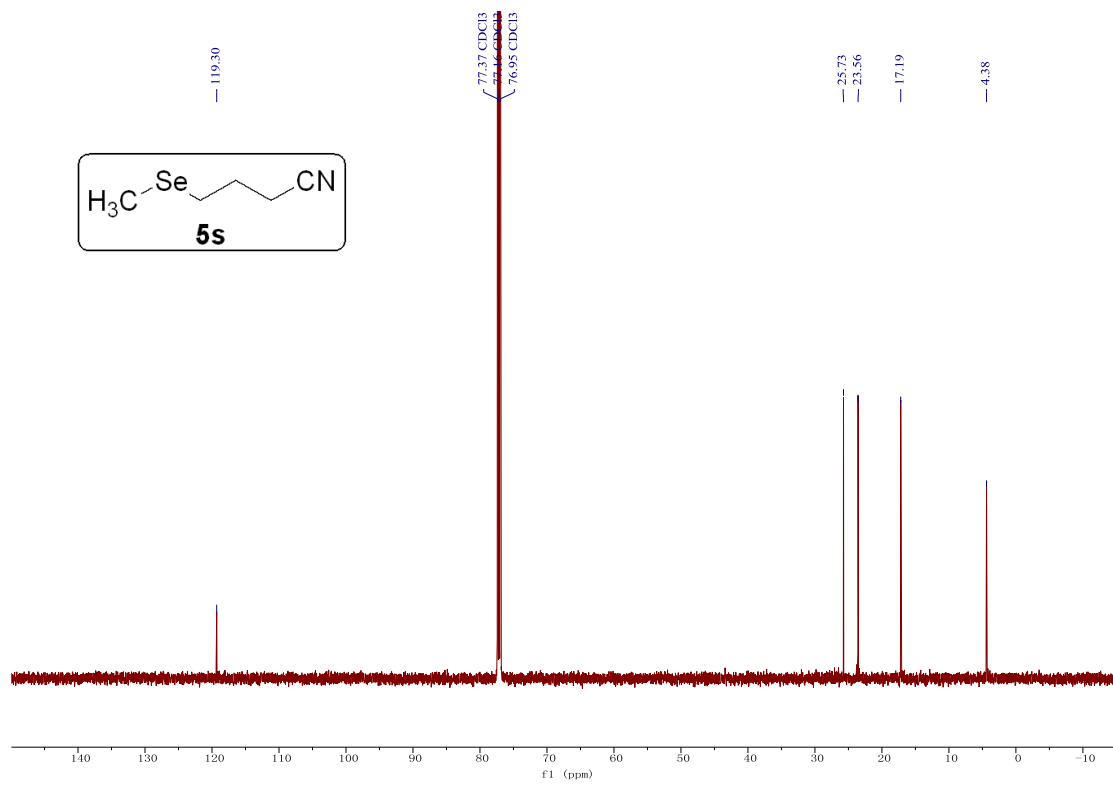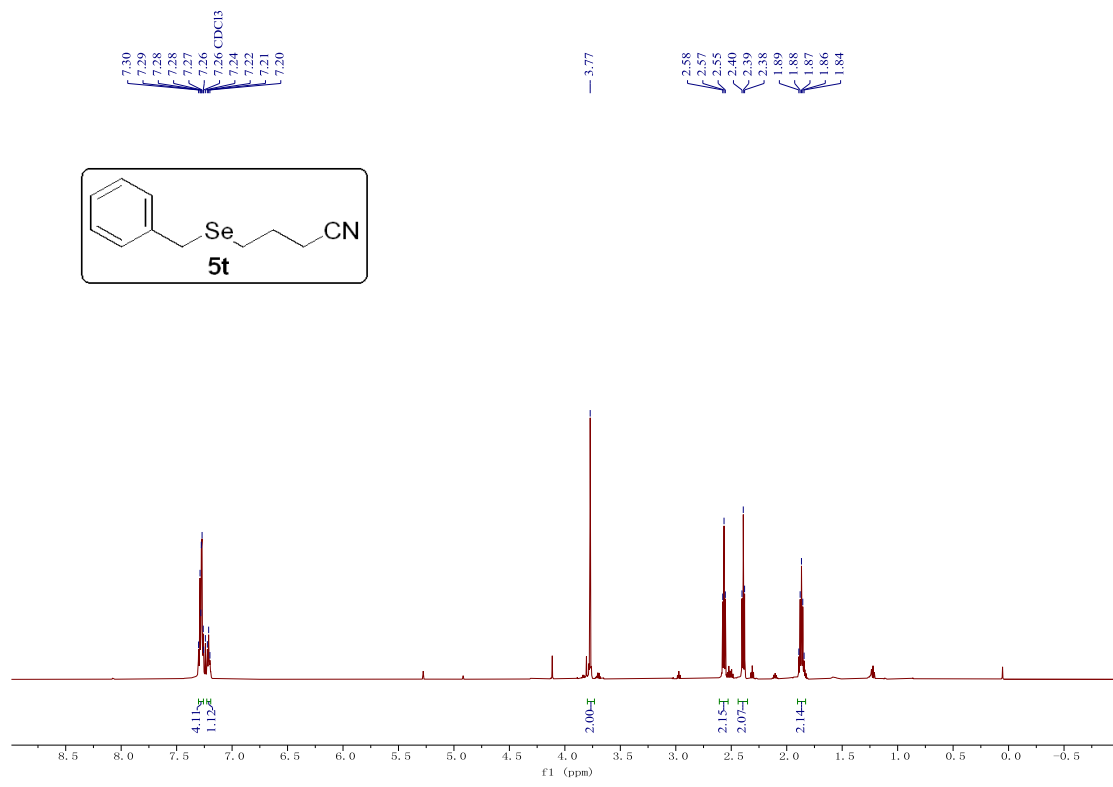

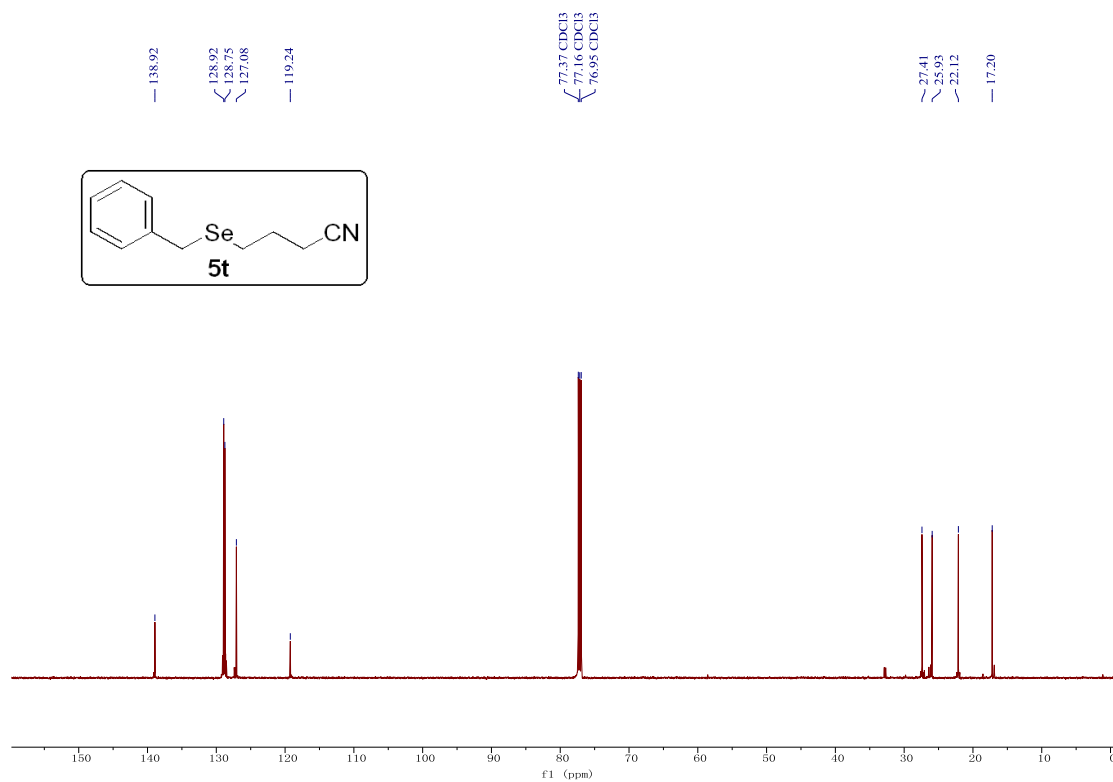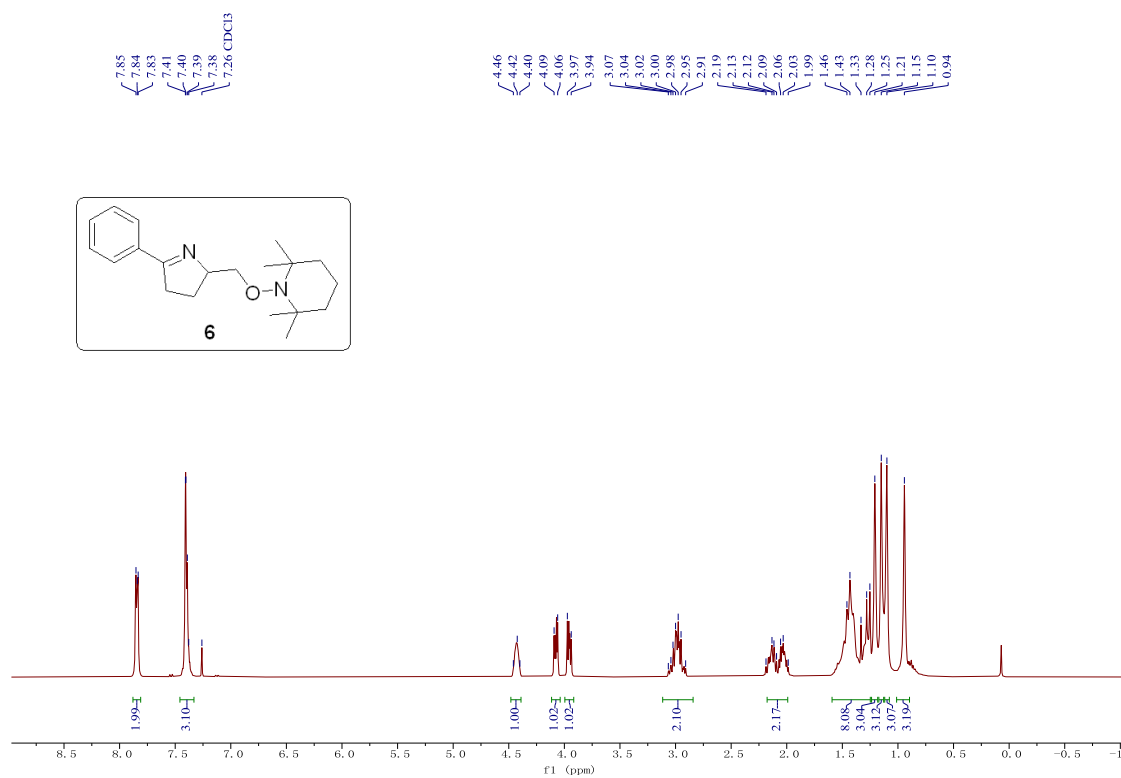

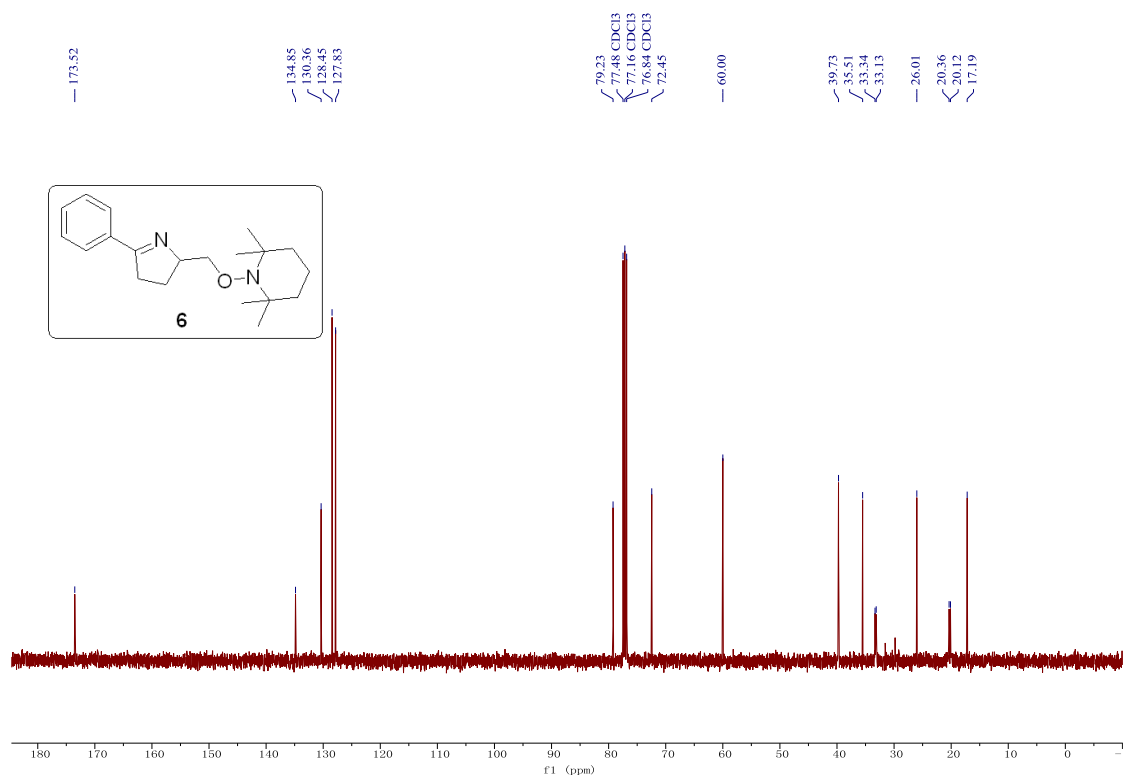

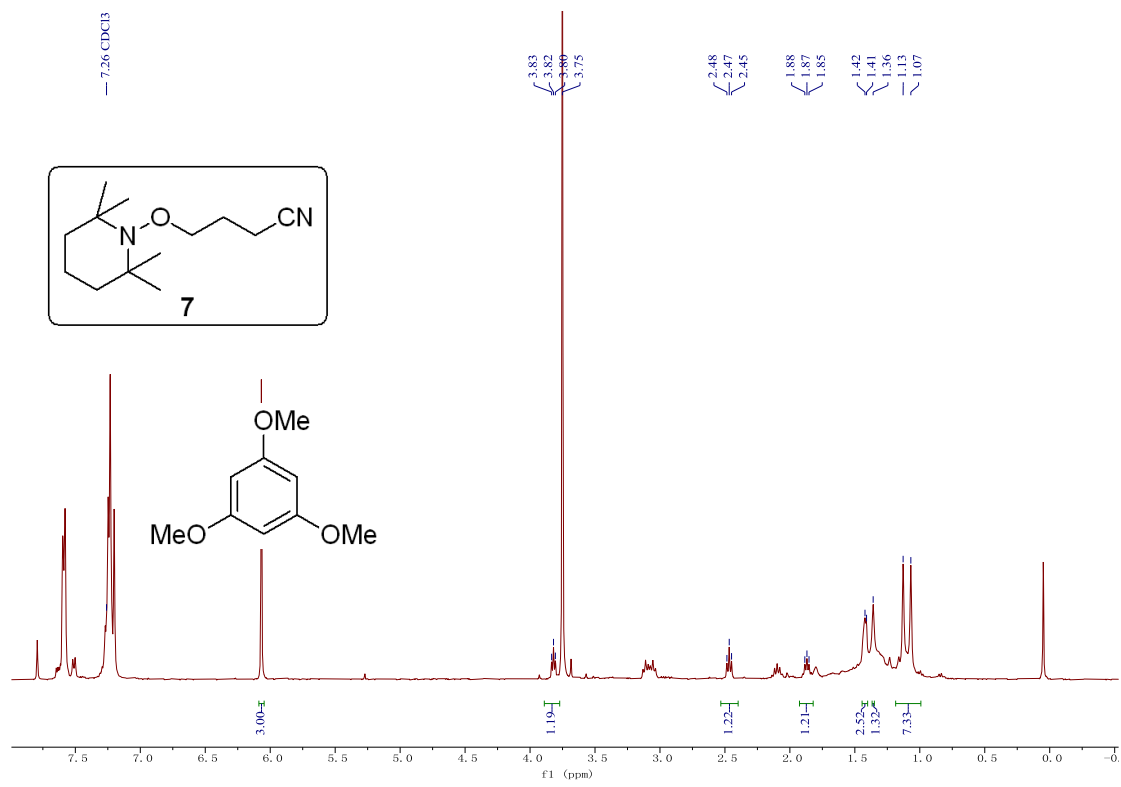



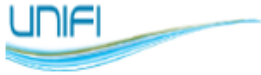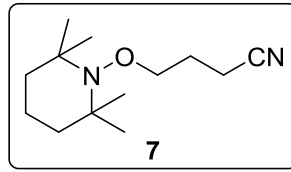

Created by: waters, waters

Created on: May 05, 2022

Created time: 14:47:08 China Standard Time

Item name: MS-20220505

Analysis Information

|                |                                           |                                    |                                           |
|----------------|-------------------------------------------|------------------------------------|-------------------------------------------|
| Item name:     | MS-20220505                               | Analysis Method Item name:         | MS-NOPDA-0929                             |
| Version:       | 2                                         | Analysis Method Version:           | 1                                         |
| Modified date: | May 05, 2022 14:44:46 China Standard Time | Sample Set Created date:           | May 05, 2022 14:27:02 China Standard Time |
| Modified by:   | waters, waters                            | Sample Set Instrument system name: | Vion UPLC                                 |
| Folder:        | Company/Sample/2022                       |                                    |                                           |

|                                           |        |            |         |
|-------------------------------------------|--------|------------|---------|
| MS Instrument Type: Waters Vion® IMS QTof |        |            |         |
| Experiment Settings:                      |        |            |         |
| Experiment type:                          | ESI+   | Scan Mode: | MS      |
| Capillary voltage:                        | 3.0kv  | Low mass:  | 50m/z   |
| Source temperature:                       | 120°C  | High mass: | 2000m/z |
| Desolvation temperature:                  | 450°C  | Scan time: | 0.200s  |
| Cone gas:                                 | 50L/h  |            |         |
| Desolvation gas:                          | 800L/h |            |         |

Item name: 20220505-CXZ-2, Sample position: 1:E.8, Replicate number: 1

|   | Formula   | Neutral mass (Da) | Observed m/z | Mass error (mDa) | Mass error (ppm) | Response | Adducts | Identification status |
|---|-----------|-------------------|--------------|------------------|------------------|----------|---------|-----------------------|
| 1 | C13H24N2O | 224.18886         | 225.19586    | -0.3             | -1.3             | 657026   | +H      | Identified            |

Item name: 20220505-CXZ-2

Channel name: Time 0.8248 +/- 0.0500 minutes

Item description:

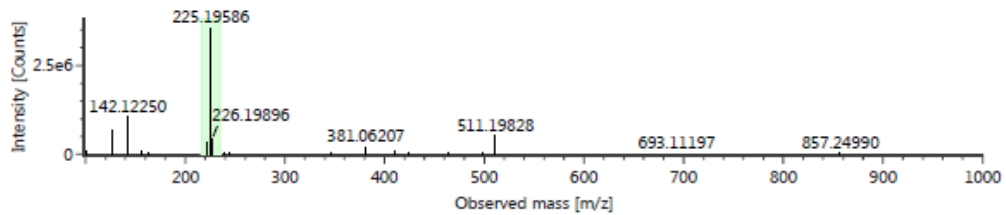

Item name: 20220505-CXZ-2

Channel name: Time 0.8248 +/- 0.0500 minutes

Item description:

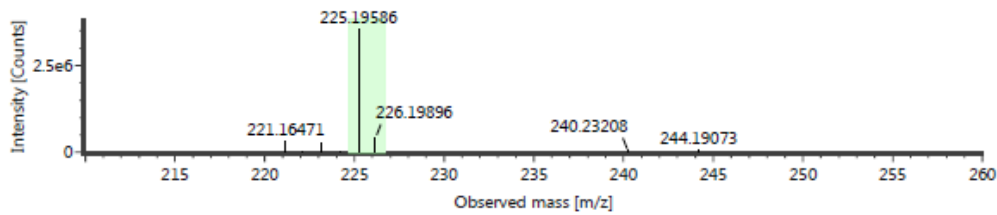

Supplement: d2qo00586g1.pdf [file d2qo00586g1.pdf]
